# Supplementary material for: STAT3 promotes RNA polymerase III-directed transcription by controlling the miR-106a-5p/TP73 axis
Source: eLife. 2023 Jan 19;12:e82826. doi: 10.7554/eLife.82826 (PMC9851613; doi:10.7554/eLife.82826)
Supplement: Figure 1—figure supplement 1—source data 2. [file elife-82826-fig1-figsupp1-data2.xlsx]

## Sheet: Figure 1-figure supplement 1
Figure 1-figure supplement 1
A		Ctrl shRNA			STAT3 shRNA
	STAT3	1.05668	0.947549	0.995774	0.40001	0.33355	0.379122
	GAPDH	1.02044	0.985283	0.994273	1.09761	0.913994	0.942558
C		Ctrl shRNA			STAT3 shRNA
	5S rRNA	0.957974	1.01772	1.02431	0.47132	0.471125	0.464566
	U6 snRNA	0.98143	1.1134	0.905168	0.425753	0.492719	0.456073
	7SL RNA	1.0839	1.03083	0.885276	0.345238	0.513385	0.46334
	GAPDH	1.05276	1.00655	0.940693	0.865703	1.09986	1.0733
E		Ctrl			mCh-STAT3
	5S rRNA	1.1282	0.953472	0.918329	2.01779	2.28134	1.7173
	U6 snRNA	0.999019	1.10312	0.89786	1.81899	1.68362	1.91372
	7SL RNA	1.13758	0.985349	0.877074	2.66572	2.45404	2.44904
	GAPDH	1.06972	1.02634	0.903945	1.08261	1.05364	1.04238
F		Ctrl shRNA			STAT3 shRNA
	tRNA-Met	1.03089	0.996855	0.972251	0.613273	0.615797	0.609011
	tRNA-Val	1.23515	0.818457	0.94639	0.472168	0.650494	0.533126
	tRNA-Thr	0.824545	1.15149	1.02397	0.593771	0.722143	0.685392
	tRNA-Leu	1.08622	0.930984	0.982795	0.286754	0.358579	0.290939
	GAPDH	0.919899	1.08055	0.999546	0.955782	0.983429	1.07836
G		Ctrl			mCh-STAT3
	tRNA-Met	1.06351	1.11949	0.817008	1.75768	1.57973	1.69613
	tRNA-Val	1.09672	0.796372	1.10691	1.70175	1.58492	1.86124
	tRNA-Thr	1.08901	1.05628	0.854703	1.48649	1.40597	1.4159
	tRNA-Leu	0.973795	1.08233	0.943879	2.4754	2.49406	2.43413
	GAPDH	0.961107	1.11279	0.9261	0.947206	1.10674	1.07454
