# Supplementary material for: STAT3 promotes RNA polymerase III-directed transcription by controlling the miR-106a-5p/TP73 axis
Source: eLife. 2023 Jan 19;12:e82826. doi: 10.7554/eLife.82826 (PMC9851613; doi:10.7554/eLife.82826)
Supplement: Figure 1—source data 2. [file elife-82826-fig1-data2.xlsx]

## Sheet: Figure 1
Figure 1
A		Ctrl shRNA			STAT3 shRNA
	STAT3	1.07036	1.01731	0.912323	0.300306	0.225155	0.184687
	GAPDH	1.07254	1.00254	0.924928	1.04803	1.06528	0.924893
C		Ctrl shRNA			STAT3 shRNA
	5S rRNA	1.04559	1.00976	0.944644	0.557086	0.49441	0.458568
	U6 snRNA	1.06773	0.998693	0.933581	0.63371	0.536359	0.655182
	7SL RNA	1.05728	1.0108	0.93192	0.309765	0.458592	0.383153
	GAPDH	1.04277	1.01507	0.942165	1.03178	0.871412	0.99734
D		Ctrl shRNA			STAT3 shRNA
	STAT3	1.03585	0.97104	0.993113	0.244179	0.216737	0.285213
	GAPDH	1.03281	0.973273	0.99392	1.01744	0.974813	1.00942
F		Ctrl shRNA			STAT3 shRNA
	5S rRNA	1.06796	1.00757	0.924468	0.378656	0.453421	0.39391
	U6 snRNA	1.06384	1.02611	0.910046	0.665013	0.613255	0.633671
	7SL RNA	1.03505	1.01926	0.94569	0.550039	0.473895	0.51417
	GAPDH	1.0673	0.923588	1.00911	1.05764	1.02211	0.95916
H		Ctrl			mCh-STAT3
	5S rRNA	0.870432	1.08855	1.04101	4.38446	4.19402	3.65513
	U6 snRNA	0.973134	0.888506	1.13836	1.83972	1.69913	1.58889
	7SL RNA	0.98387	1.16222	0.853909	2.70671	2.41536	2.3612
	GAPDH	1.0568	1.01377	0.929434	1.10851	0.91288	0.967998
J		Ctrl			mCh-STAT3
	5S rRNA	1.08579	0.929037	0.985178	3.13498	2.79752	3.01976
	U6 snRNA	0.958358	0.987002	1.05464	1.65681	1.44533	1.57965
	7SL RNA	1.08898	0.993003	0.918016	2.818	2.48988	2.60207
	GAPDH	1.01231	1.03135	0.956347	1.07039	0.948767	1.00118
K		Ctrl shRNA			STAT3 shRNA
	tRNA-Met	0.925671	1.01423	1.06009	0.436048	0.464125	0.470939
	tRNA-Val	0.956241	0.94618	1.09758	0.535094	0.609382	0.605384
	tRNA-Thr	1.06487	0.990016	0.945109	0.67191	0.648518	0.699341
	tRNA-Leu	0.986361	1.08229	0.931347	0.552964	0.598749	0.683859
	GAPDH	0.954453	0.981509	1.06404	1.0253	1.05643	0.886991
L		Ctrl shRNA			STAT3 shRNA
	tRNA-Met	0.951043	1.05505	0.99391	0.487046	0.440014	0.457908
	tRNA-Val	0.962502	1.0605	0.976995	0.633324	0.528824	0.560501
	tRNA-Thr	1.00888	1.04726	0.943856	0.485991	0.494395	0.515226
	tRNA-Leu	1.00069	1.06732	0.93199	0.627786	0.672417	0.645748
	GAPDH	1.01799	1.03789	0.944127	0.966498	1.01446	0.928958
M		Ctrl			mCh-STAT3
	tRNA-Met	0.998741	0.959628	1.04163	2.27021	1.92038	2.05748
	tRNA-Val	0.966451	0.900007	1.13354	2.45383	2.29431	2.64014
	tRNA-Thr	1.11831	0.93311	0.948581	2.36932	2.26349	2.58355
	tRNA-Leu	1.02528	1.02104	0.953676	1.51275	1.39246	1.57702
	GAPDH	1.00195	1.04547	0.952579	0.952251	0.931354	0.970019
N		Ctrl			mCh-STAT3
	tRNA-Met	0.888412	1.01976	1.09183	2.01154	1.68659	2.06616
	tRNA-Val	1.03731	1.01645	0.946248	1.54778	1.41912	1.64251
	tRNA-Thr	0.84911	0.938604	1.21229	1.28864	1.31911	1.38387
	tRNA-Leu	1.06265	1.02411	0.913241	2.15192	2.20232	1.99411
	GAPDH	0.975136	0.902655	1.12221	0.901392	0.897158	1.08718
