# Supplementary material for: STAT3 promotes RNA polymerase III-directed transcription by controlling the miR-106a-5p/TP73 axis
Source: eLife. 2023 Jan 19;12:e82826. doi: 10.7554/eLife.82826 (PMC9851613; doi:10.7554/eLife.82826)
Supplement: Figure 2—figure supplement 1—source data 1. [file elife-82826-fig2-figsupp1-data1.xlsx]

## Sheet: Figure 2-figure supplement 1
Figure 2-figure supplement 1
A	Time(day)	Ctrl shRNA			STAT3 shRNA
	0	2	2	2	2	2	2
	1	2	3	5	2	3	3
	2	5	5	7	4	4	4
	3	8	10	11	5	6	4
	4	11	13	16	7	8	6
	5	26	25	32	13	11	15
B	Time(day)	Ctrl shRNA			STAT3 shRNA
	1	0.2375	0.2772	0.2555	0.2375	0.2455	0.2561
	2	0.3561	0.2966	0.3646	0.2755	0.2698	0.2721
	3	0.5077	0.5499	0.5868	0.3567	0.3587	0.3552
	4	0.9915	0.9248	0.8818	0.4938	0.4901	0.5021
C	Time(day)	Ctrl shRNA			STAT3 shRNA
	0	2	2	2	2	2	2
	1	3	3	5	3	4	3
	2	7	8	8	6	8	7
	3	18	22	25	12	14	17
	4	39	43	53	22	25	31
	5	102	119	126	41	48	53
D	Time(day)	Ctrl shRNA			STAT3 shRNA
	1	0.2954	0.3042	0.3128	0.2895	0.3104	0.3064
	2	0.4521	0.4682	0.4704	0.3973	0.4063	0.4266
	3	0.8581	0.8757	0.8978	0.5133	0.5621	0.5925
	4	1.6725	1.7754	1.9047	0.96732	1.0364	1.1352
E	Time(day)	Ctrl			mCh-STAT3
	0	2	2	2	2	2	2
	1	4	2	3	4	5	4
	2	4	6	6	8	9	8
	3	7	11	9	15	13	14
	4	12	13	15	30	33	28
	5	27	25	33	56	62	51
F	Time(day)	Ctrl			mCh-STAT3
	1	0.2569	0.2487	0.2536	0.2684	0.2694	0.2822
	2	0.3677	0.3589	0.3682	0.3732	0.3849	0.3851
	3	0.5136	0.5344	0.5793	0.7921	0.8044	0.8182
	4	0.9473	0.9946	1.1383	1.5322	1.6217	1.6678
G	Time(day)	Ctrl			mCh-STAT3
	0	2	2	2	2	2	2
	1	3	4	5	4	5	5
	2	8	7	10	10	13	16
	3	21	17	25	27	31	37
	4	37	44	49	62	67	78
	5	97	93	107	143	157	165
H	Time(day)	Ctrl			mCh-STAT3
	1	0.3027	0.3144	0.3063	0.3074	0.3153	0.3245
	2	0.4069	0.4258	0.4126	0.5351	0.5512	0.5683
	3	0.8452	0.8871	0.8515	1.0634	1.1785	1.2485
	4	1.5926	1.7532	1.6943	1.9384	2.0763	2.3761
