# Supplementary material for: STAT3 promotes RNA polymerase III-directed transcription by controlling the miR-106a-5p/TP73 axis
Source: eLife. 2023 Jan 19;12:e82826. doi: 10.7554/eLife.82826 (PMC9851613; doi:10.7554/eLife.82826)
Supplement: Figure 2—figure supplement 2—source data 1. [file elife-82826-fig2-figsupp2-data1.xlsx]

## Sheet: Figure 2-figure supplement 2
Figure 2-figure supplement 2
A	Time(day)	Ctrl			Ctrl+ML-60218			mCh-STAT3			mCh-STAT3+ML-60218
	0	2	2	2	2	2	2	2	2	2	2	2	2
	1	3	3	3	2	2	3	4	5	5	3	4	3
	2	6	6	7	4	4	5	8	8	11	6	6	7
	3	14	15	18	6	5	7	24	25	27	12	14	15
	4	30	31	35	8	11	12	49	53	61	21	25	26
B		Ctrl			Ctrl+ML-60218			mCh-STAT3			mCh-STAT3+ML-60218
	5S rRNA	1.10426	0.86481	1.03093	0.42796	0.48764	0.49942	5.68318	6.72089	6.02678	2.22223	2.03194	1.95277
	U6 snRNA	0.99991	1.16268	0.83741	0.72011	0.69426	0.63987	2.06854	1.8695	1.67836	0.81495	0.97664	0.82007
	7SL RNA	0.94545	0.94819	1.10636	0.54082	0.53004	0.56936	2.0177	1.70141	1.71364	0.68685	0.80365	0.74601
	tRNA-Met	1.03123	0.87933	1.08943	0.54689	0.51502	0.43664	2.89003	2.75868	2.16663	1.49874	1.08549	1.38393
	tRNA-Val	0.90188	1.1616	0.93653	0.46845	0.53218	0.63712	1.50077	1.40728	1.11884	0.73511	0.70316	0.68368
	tRNA-Thr	0.91117	0.99608	1.09274	0.30821	0.34611	0.33486	2.1102	1.79359	1.86186	0.8119	0.64829	0.70214
	tRNA-Leu	0.9401	1.09531	0.96459	0.71699	0.66611	0.63232	1.75433	1.44403	1.53755	0.61355	0.52501	0.46411
	GAPDH	1.03197	0.94595	1.02208	0.96251	0.93015	0.94243	0.9831	0.80352	0.99815	0.99074	0.96297	0.8597
