# Supplementary material for: STAT3 promotes RNA polymerase III-directed transcription by controlling the miR-106a-5p/TP73 axis
Source: eLife. 2023 Jan 19;12:e82826. doi: 10.7554/eLife.82826 (PMC9851613; doi:10.7554/eLife.82826)
Supplement: Figure 2—figure supplement 3—source data 1. [file elife-82826-fig2-figsupp3-data1.xlsx]

## Sheet: Figure 2-figure supplement 3
Figure 2-figure supplement 3
B	Ctrl shRNA	STAT3 shRNA
	57	2
	70	17
	48	14
C	Ctrl shRNA	STAT3 shRNA
	1.94753	0.234242
	1.83352	0.208331
	1.57544	0.15858
	1.3754	0.156507
	1.1878	0.106756
	1.16603	0.10572
	1.14634	0.100538
	1.09244	0.098465
	1.11317	0.096392
	1.09244	0.080845
	1.09451	0.069444
	1.03232	0.058042
	0.988793	0.057006
	0.988793	0.059079
	0.977392	0.046641
E	Ctrl	mCh-STAT3
	57	105
	64	121
	50	97
F	Ctrl	mCh-STAT3
	2.54753	3.60277
	2.84546	3.52504
	1.93613	3.44212
	2.73509	3.37579
	1.82004	3.33951
	2.30864	3.28458
	2.50657	3.18922
	1.78998	3.16745
	1.74749	3.15813
	1.73505	2.93843
	1.71329	3.12185
	1.66146	3.09594
	1.64902	2.5835
	1.64488	2.87417
	1.6397	3.07521
