# Supplementary material for: STAT3 promotes RNA polymerase III-directed transcription by controlling the miR-106a-5p/TP73 axis
Source: eLife. 2023 Jan 19;12:e82826. doi: 10.7554/eLife.82826 (PMC9851613; doi:10.7554/eLife.82826)
Supplement: Figure 2—source data 1. [file elife-82826-fig2-data1.xlsx]

## Sheet: Figure 2
Figure 2
A	Time(day)	Ctrl shRNA			STAT3 shRNA
	0	2	2	2	2	2	2
	1	4	5	3	4	4	3
	2	8	7	8	7	8	6
	3	20	19	17	13	15	13
	4	45	40	42	20	23	21
	5	89	93	86	45	47	44
B	Time(day)	Ctrl shRNA			STAT3 shRNA
	1	0.3252	0.3491	0.3452	0.3259	0.3301	0.3362
	2	0.7221	0.7592	0.6783	0.5972	0.5893	0.6102
	3	1.5721	1.5014	1.5421	1.0853	1.1024	1.1036
	4	2.9875	2.9216	2.8057	2.0682	1.9576	1.9753
C	Time(day)	Ctrl			mCh-STAT3
	0	2	2	2	2	2	2
	1	3	4	4	4	4	5
	2	8	9	6	10	11	11
	3	18	15	17	31	28	30
	4	47	43	44	74	72	75
	5	80	83	85	123	134	128
D	Time(day)	Ctrl			mCh-STAT3
	1	0.3521	0.3352	0.3405	0.3425	0.3521	0.3473
	2	0.7012	0.6953	0.7021	0.8521	0.8753	0.8862
	3	1.4672	1.4689	1.4795	1.9521	1.8753	1.8926
	4	2.8523	2.8653	2.7632	3.5101	3.5769	3.4356
F	Ctrl shRNA	STAT3 shRNA
	55.0562	38.2353
	52.1127	35.7143
	57.2917	39.759
H	Ctrl	mCh-STAT3
	28.5714	51.5151
	32.7103	50.8929
	26.0417	47.7273
I	Time(week)	Ctrl shRNA		STAT3 shRNA
		Mean	SD	Mean	SD
	1	69.2527	21.2386	59.6249	9.77417
	2	141.38	26.8941	64.0835	12.8091
	3	281.69	56.6081	91.8758	25.9947
	4	438.165	99.4861	175.999	48.1389
	5	732.067	239.156	233.75	81.4395
K	Ctrl shRNA	STAT3 shRNA
	1.033	0.292
	0.678	0.181
	0.373	0.151
	0.262	0.126
	0.244	0.086
	0.201	0.076
