# Supplementary material for: STAT3 promotes RNA polymerase III-directed transcription by controlling the miR-106a-5p/TP73 axis
Source: eLife. 2023 Jan 19;12:e82826. doi: 10.7554/eLife.82826 (PMC9851613; doi:10.7554/eLife.82826)
Supplement: Figure 3—source data 2. [file elife-82826-fig3-data2.xlsx]

## Sheet: Figure 3
Figure 3
A		Ctrl shRNA		STAT3 shRNA
		Mean	SD	Mean	SD
	0.02% Input	1	0.08259	1	0.06786
	TBP	1.22601	0.10422	0.40588	0.06191
	GTF3C2	0.94014	0.07324	0.42971	0.04292
	GTF3C3	0.76104	0.05386	0.32559	0.0613
	BRF1	0.97531	0.12065	0.70852	0.05203
	POLR3A	1.15489	0.06293	0.57805	0.04107
	IgG	0.12064	0.037	0.12966	0.03141
B	0.02% Input	TBP	GTF3C2	GTF3C3	BRF1	POLR3A	IgG
	1	3.02064	2.18783	2.33738	1.37654	1.99789	0.930437
C		Ctrl shRNA		STAT3 shRNA
		Mean	SD	Mean	SD
	0.02% Input	1	0.07467	1	0.09089
	TBP	1.62362	0.14182	0.42827	0.05653
	GTF3C2	0.28049	0.0641	0.26606	0.10522
	GTF3C3	0.29029	0.07497	0.3088	0.06539
	BRF1	0.21972	0.07009	0.231776	0.04255
	BRF2	0.76924	0.044851	0.507713	0.06284
	POLR3A	2.17558	0.13761	0.85277	0.06235
	IgG	0.12021	0.04562	0.12703	0.03293
D	0.02% Input	TBP	GTF3C2	GTF3C3	BRF1	BRF2	POLR3A	IgG
	1	3.79111	1.05424	0.940058	0.947984	1.51511	2.55119	0.946312
E		Ctrl shRNA		STAT3 shRNA
		Mean	SD	Mean	SD
	0.02% Input	1	0.09395	1	0.06753
	TBP	1.32796	0.15054	0.29466	0.07068
	GTF3C2	0.92561	0.11146	0.31018	0.05091
	GTF3C3	1.1343	0.09752	0.45523	0.04568
	BRF1	0.81467	0.16156	0.57953	0.04911
	POLR3A	2.19263	0.24494	1.24334	0.15792
	IgG	0.20778	0.04975	0.17846	0.0296
F	0.02% Input	TBP	GTF3C2	GTF3C3	BRF1	POLR3A	IgG
	1	4.50679	2.98414	2.4917	1.40573	1.7635	1.16432
G		Ctrl shRNA		STAT3 shRNA
		Mean	SD	Mean	SD
	0.02% Input	1	0.02198	1	0.01382
	TBP	0.84168	0.01638	0.2747	0.04413
	GTF3C2	1.01418	0.03274	0.57014	0.03933
	GTF3C3	0.81032	0.02703	0.31985	0.04306
	BRF1	0.55817	0.04465	0.33712	0.02301
	POLR3A	2.25727	0.24128	1.22057	0.09333
	IgG	0.15415	0.0556	0.13638	0.02588
H	0.02% Input	TBP	GTF3C2	GTF3C3	BRF1	POLR3A	IgG
	1	3.06398	1.77881	2.53345	1.6557	1.84936	1.13031
I		Input		IgG		STAT3
		Mean	SD	Mean	SD	Mean	SD
	BCL2P	1	0.082633	0.180808	0.020144	0.702139	0.049608
	5S rRNA GL	1	0.09208	0.12901	0.01738	0.12251	0.02574
	U6 snRNA GL	1	0.08055	0.2937	0.05454	0.32317	0.02086
	7SL RNA GL	1	0.08449	0.1552	0.03779	0.1923	0.02938
	tRNA-Met GL	1	0.13192	0.1751	0.02834	0.16266	0.02658
