# Supplementary material for: STAT3 promotes RNA polymerase III-directed transcription by controlling the miR-106a-5p/TP73 axis
Source: eLife. 2023 Jan 19;12:e82826. doi: 10.7554/eLife.82826 (PMC9851613; doi:10.7554/eLife.82826)
Supplement: Figure 4—figure supplement 1—source data 1. [file elife-82826-fig4-figsupp1-data1.xlsx]

## Sheet: Figure 4-figure supplement 1
Figure 4-figure supplement 1
A	GO_class	GO ID	GO_term	Hit_number	Background number	P-Value	Q-Value	Gene IDs
	Biological Process	GO:0042127	regulation of cell proliferation	129	2724	9.96578e-12	1.85397e-09	SULF2,GAREM1,BMPR1B,PRKCH,CD33,DPT,SERPINE2,DUX4L45,GKN2,MFGE8,PTH1R,BDKRB2,ADORA1,GAB2,RERG,TP73,SERPINF2,EPCAM,NPR3,C5AR2,NRP2,MBD5,FGFR4,IL1RAP,TLR4,DUX4L26,FABP3,SCIN,SLC7A7,STAT3,APLN,P3H2,BMP6,PLAG1,COL4A5,NCCRP1,PDE5A,STOX1,PTGS2,S1PR3,SKAP2,PIM2,IFITM1,PAX6,HNF4A,FGFR3,FN1,ALDH3A1,SPINT2,CNTNAP3B,PRSS23,CLDN7,AKR1C1,SLC39A10,CCN2,DNAJB2,HIPK2,PRDM1,VEGFC,EFNB2,CTSH,WFDC1,CABP4,ICOSLG,KRT4…
	Biological Process	GO:0008283	cell proliferation	152	3534	1.40298e-10	2.03234e-08	HOXD13,CDH2,P3H3,VASH1,BHLHE41,NMB,MVD,ETV4,CAMK2D,PTK2B,EBI3,NES,FTH1,ITGA1,BMP4,NPR1,ARX,TBX3,LGALS9C,EGR3,DAB2,TLR5,F2R,SNAI2,CHRM1,NR5A2,MELTF,FZD5,GPR37L1,PID1,HDAC4,HNF1B,IGFBP6,ETV5,FOXF1,NR4A3,ARNT2,FP565260.3,HOXA5,KALRN,INHA,IGFBP7,TGM2,PDK1,CARD11,FGF7,DOCK8,LMX1B,EDN2,TGFA,BOK,EHF,DHRS2,SPRY2,PLCE1,IL20RB,COPS9,FAP,DISC1,HEY2,ID1,NOG,BMP2,TFAP2C,KIF20B,F2RL1,KLF9,NGFR,VIPR2,BCAT1,ENG,…
	Biological Process	GO:0008285	negative regulation of cell proliferation	58	1028	2.74853e-08	1.89292e-06	PTGS2,DUX4L45,BDKRB2,SKAP2,PTH1R,KLF9,TP73,PAX6,IFITM1,PIM2,ADORA1,NGFR,RERG,HNF4A,VIPR2,IGFBP7,P3H2,BMP2,HDAC4,IGFBP6,BMPR1B,SPRY2,F2R,IL20RB,DPT,CD33,SERPINE2,SNAI2,FAP,PDE5A,FZD5,NOG,NPR1,ITGA1,BMP4,PRDM1,VEGFC,DNAJB2,DHRS2,LGALS9C,DAB2,EFNB2,SCIN,STAT3,PTK2B,SLC7A7,DUX4L26,FABP3,WFDC1,LIMS2,KRT4,FTH1,NPR3,CNTNAP3B,SPINT2,ETV4,P3H3,VASH1
	Biological Process	GO:0008284	positive regulation of cell proliferation	73	1614	2.60886e-06	0.000107969	MAP3K5,ICOSLG,CABP4,EFNB2,CTSH,HIPK2,VEGFC,CCN2,SLC39A10,AKR1C1,EDN2,CLDN7,PRSS23,ALDH3A1,TGFA,FGFR3,FN1,PAX6,S1PR3,PTGS2,STOX1,DISC1,HEY2,ID1,NOG,PLCE1,COPS9,BMP6,COL4A5,NCCRP1,PLAG1,KIF20B,BMP2,APLN,NES,PTK2B,STAT3,CAMK2D,SLC7A7,EBI3,TLR4,LGALS9C,EGR3,IL1RAP,BMP4,ITGA1,TBX3,FGFR4,MBD5,MVD,NRP2,C5AR2,SERPINF2,EPCAM,NMB,TGM2,ARNT2,FP565260.3,GAB2,MFGE8,PTH1R,CARD11,FGF7,CHRM1,PRKCH,F2R,ETV5,FOXF1…
	Biological Process	GO:0033002	muscle cell proliferation	22	374	0.000329376	0.00588442	NPR3,HDAC4,SERPINF2,PRSS23,NR4A3,PLCE1,NOG,HEY2,ITGA1,PTGS2,NPR1,BMP4,FOXC2,MFGE8,SLC7A7,CAMK2D,TP73,CABP4,VIPR2,KALRN,MAP3K5,TGM2
	Biological Process	GO:0050678	regulation of epithelial cell proliferation	26	481	0.000369605	0.00646236	EFNB2,EGR3,DAB2,FGF7,BMP4,VEGFC,KRT4,LIMS2,NGFR,WFDC1,KLF9,HOXA5,PAX6,ETV4,NRP2,BMP6,NR4A3,BMP2,TGFA,SULF2,C5AR2,ID1,NOG,VASH1,STOX1,SNAI2
	Biological Process	GO:0050673	epithelial cell proliferation	29	564	0.000396681	0.00685604	FGF7,BMP4,VEGFC,DAB2,EGR3,EFNB2,EHF,WFDC1,NGFR,KLF9,HOXA5,PAX6,KRT4,LIMS2,BMP2,TGFA,SULF2,C5AR2,ETV4,BMP6,NRP2,NR4A3,HNF1B,SNAI2,FAP,ID1,VASH1,NOG,STOX1
	Biological Process	GO:2000177	regulation of neural precursor cell proliferation	11	137	0.000882192	0.0126536	PAX6,CDH2,MBD5,NES,LIMS2,NOG,DISC1,VEGFC,GPR37L1,IL1RAP,SPINT2
	Biological Process	GO:0061351	neural precursor cell proliferation	17	276	0.000911902	0.0129155	NES,LIMS2,RERG,PAX6,IL1RAP,AC019068.1,VEGFC,ZEB2,ARX,NOG,DISC1,CDH2,MBD5,SPINT2,HNF4G,GPR37L1,HDAC4
	Biological Process	GO:0048659	smooth muscle cell proliferation	18	310	0.00127976	0.0168025	PLCE1,NR4A3,PRSS23,HDAC4,SERPINF2,NPR3,TGM2,VIPR2,KALRN,MAP3K5,CABP4,CAMK2D,SLC7A7,MFGE8,ITGA1,NPR1,BMP4,PTGS2
B		CtrlshRNA1	CtrlshRNA2	CtrlshRNA3	STAT3shRNA1	STAT3shRNA2	STAT3shRNA3
	MAP3K5	2.64	2.16	2.01	0.91	1.01	0.93
	ICOSLG	3.04	3.48	2.52	1.07	1	0.7
	CABP4	0.31	0.95	0.3	0.12	0.08	0.13
	EFNB2	1.33	1.58	1.26	3.59	3.56	3.88
	CTSH	3.84	2.38	4.32	26.79	31.26	29.94
	HIPK2	1.74	1.08	1.04	0.97	0.83	0.59
	VEGFC	1.35	1.14	0.96	0.65	0.45	0.34
	CCN2	7.3	7.44	6.81	12.83	15.03	21.89
	SLC39A10	25.34	20.27	16.46	10.11	10.58	12.23
	AKR1C1	31.08	24.07	26.8	1.02	1.36	1.63
	EDN2	0.92	0.83	1.04	2.42	3.73	2.97
	CLDN7	48.14	50.16	77.16	25.38	30.04	29.29
	PRSS23	51.67	56.83	45.25	24.27	25.94	28
	ALDH3A1	31.17	40	44.36	85.56	109.22	88.18
	TGFA	1.91	1.58	1.3	3.34	2.77	2.79
	FGFR3	10.74	12.04	13.33	2.5	2.71	3.18
	FN1	2.39	1.96	1.49	0.56	0.7	0.13
	PAX6	5.4	2.7	2.87	0.08	0.17	0.37
	S1PR3	2.12	1.61	1.42	5.22	5.65	5.4
	PTGS2	3.69	1.98	1.96	13.11	12.87	16.11
	STOX1	0.64	0.27	0.43	2.23	1.42	2.31
	DISC1	0.63	0.08	0.14	0.53	0.69	0.68
	HEY2	0.36	0.24	0.53	3.31	3	2.37
	ID1	152.78	160.54	243.96	78.15	89.5	83.43
	NOG	5.79	6.81	8.15	1.61	1.88	1.2
	PLCE1	0.65	1.12	0.5	3.76	3.45	3.93
	COPS9	193.11	241.51	393.06	86.53	138.32	117.19
	BMP6	9.73	9.2	10.58	4.43	5	4.04
	COL4A5	22.99	19.61	17.85	12.32	9.47	12.48
	NCCRP1	2.97	2.47	2.54	0.95	1.59	1.01
	PLAG1	0.05	0.02	0.05	0.15	0.3	0.24
	KIF20B	9.53	8.49	4.86	4.66	2.28	4.47
	BMP2	32.87	29.29	29.18	11.3	10.67	11.51
	APLN	0.15	0.37	0.25	0.83	1.19	0.76
	NES	2.41	3.24	2.91	6.63	8	6.14
	PTK2B	5.49	5.63	4.6	1.55	3.26	2.61
	STAT3	69.04	63.63	60.13	10.9	14.07	12.35
	CAMK2D	0.67	0.71	0.56	0.15	0.14	0.14
	SLC7A7	0.32	0.26	0.1	2.25	1.47	1.42
	EBI3	0.83	0.57	0.86	1.58	2.62	2.23
	TLR4	0.04	0.03	0.07	0.45	0.29	0.41
	LGALS9C	1.86	0.67	0.73	0.04	0.02	0.29
	EGR3	0	0	0	0.1	0.26	0.88
	IL1RAP	8.24	6.3	5.74	3.4	5.65	3.36
	BMP4	3.83	2.86	3.27	7.17	7.89	5.91
	ITGA1	9.72	6.14	8.02	4.17	3.88	4.94
	TBX3	21.16	20.85	20.44	10.9	10.31	9.89
	FGFR4	11.64	15.61	17.01	7.62	9.14	7.15
	MBD5	3.69	2.56	3.48	1.72	3.1	1.59
	MVD	71.7	48.81	91.83	19.93	38.91	23.8
	NRP2	11.3	9.09	11.76	3.86	3.89	4.08
	C5AR2	0.7	0.9	0.7	0.11	0.05	0.13
	SERPINF2	0.46	0.64	0.72	2.04	2.96	1.95
	EPCAM	2.34	2.09	1.91	8.54	8.9	7.18
	NMB	0	0	0.21	6.31	8.48	8.2
	TGM2	35.36	38.82	44.34	14.66	16.22	14.87
	ARNT2	0.15	0.04	0.24	0.03	0	0
	FP565260.3	5.82	3.29	4.82	0.84	1.39	1.67
	GAB2	3.55	3.59	3.21	7.95	7.83	6.39
	MFGE8	5.09	4.7	4.3	12.76	14.65	11.8
	PTH1R	0.49	0.99	1.39	1.88	1.83	2.52
	CARD11	0.73	0.43	0.76	3.99	2.92	2.59
	FGF7	0.02	0.02	0.06	1.86	1.08	0.94
	CHRM1	0.17	0.11	0.34	1.36	1.24	0.99
	PRKCH	1.31	2.81	2.25	0.64	2.16	0.46
	F2R	0.46	0.66	0.61	3.75	3.47	4.53
	ETV5	3.78	5.09	6.26	2.74	2.37	1.51
	FOXF1	0.95	0.83	0.72	0.21	0.22	0.1
	NR4A3	2.68	2.15	2.38	1.26	1.19	1.17
	GAREM1	0.42	0.39	0.44	3.52	1.41	1.73
	PID1	0.79	0.46	0.52	0.13	0	0.2
	HDAC4	14.78	11.36	15.42	8.06	8.45	6.16
	GPR37L1	0.13	0.12	0.1	0.35	0.31	0.26
