# Supplementary material for: STAT3 promotes RNA polymerase III-directed transcription by controlling the miR-106a-5p/TP73 axis
Source: eLife. 2023 Jan 19;12:e82826. doi: 10.7554/eLife.82826 (PMC9851613; doi:10.7554/eLife.82826)
Supplement: Figure 4—figure supplement 2—source data 1. [file elife-82826-fig4-figsupp2-data1.xlsx]

## Sheet: Figure 4-figure supplement 2
Figure 4-figure supplement 2
A	Ctrl shRNA	FLNA shRNA
	453.589	34.133
	485.989	30.9547
	465.915	35.9971
B	Ctrl shRNA	FLNA shRNA
	39.1421	12.7196
	35.955	13.4047
	35.6864	13.0817
C	Ctrl shRNA	FLNA shRNA
	0.073369	4.05021
	0.03124	3.41363
	0.016412	3.12506
D		CtrlshRNA1	CtrlshRNA2	CtrlshRNA3	FLNAshRNA1	FLNAshRNA2	FLNAshRNA3
	FLNA	453.589	485.989	465.915	34.133	30.9547	35.9971
	STAT3	39.1421	35.955	35.6864	12.7196	13.4047	13.0817
	TP73	0.0733686	0.0312395	0.0164119	4.05022	3.41363	3.12506
