# Supplementary material for: STAT3 promotes RNA polymerase III-directed transcription by controlling the miR-106a-5p/TP73 axis
Source: eLife. 2023 Jan 19;12:e82826. doi: 10.7554/eLife.82826 (PMC9851613; doi:10.7554/eLife.82826)
Supplement: Figure 4—source data 1. [file elife-82826-fig4-data1.xlsx]

## Sheet: Figure 4A
Figure 4
A	gene_id	gene_name	CtrlshRNA1	CtrlshRNA2	CtrlshRNA3	STAT3shRNA1	STAT3shRNA2	STAT3shRNA3
	ENSG00000003147.19	ICA1	0.7	0.71	0.39	2.99	5.14	4.93
	ENSG00000005020.13	SKAP2	5.89	3.38	2.59	11.66	8.8	11.6
	ENSG00000005243.10	COPZ2	6.54	6.74	8.83	19.62	58.66	19.62
	ENSG00000005469.11	CROT	8.18	6.16	4.85	13.06	13.07	15.3
	ENSG00000006283.18	CACNA1G	0.06	0.01	0.08	0.39	0.51	0.4
	ENSG00000006747.15	SCIN	1.93	1.47	1.74	3.61	4.08	3.93
	ENSG00000006756.16	ARSD	4.48	5.26	4.73	9.11	9.99	7.19
	ENSG00000008517.16	IL32	13.98	15.2	16.62	98.01	101.5	108.58
	ENSG00000016402.13	IL20RA	0	0	0	0.38	0.95	1.34
	ENSG00000020181.17	ADGRA2	0.49	0.66	0.93	1.91	2.38	2.86
	ENSG00000020577.13	SAMD4A	2.5	1.84	1.42	3.37	4.27	4.15
	ENSG00000025039.14	RRAGD	0.48	0.31	0.66	1.26	2.11	1.32
	ENSG00000027869.11	SH2D2A	7.38	5.01	9.39	13.77	17.71	14.84
	ENSG00000029153.14	ARNTL2	7.45	5.4	5.02	16.25	13.03	17.33
	ENSG00000029534.20	ANK1	0.04	0.09	0.16	0.28	0.49	0.38
	ENSG00000033327.13	GAB2	3.55	3.59	3.21	7.95	7.83	6.39
	ENSG00000035115.21	SH3YL1	3.36	3.31	2.04	6.11	6.12	8.04
	ENSG00000038002.9	AGA	5.67	5.68	3.29	8.37	8.69	9.27
	ENSG00000041353.10	RAB27B	1.97	1.87	2.41	5.03	5.39	5.38
	ENSG00000046653.15	GPM6B	0.34	0.29	0.54	1.32	0.6	1.59
	ENSG00000047644.18	WWC3	7.3	5.09	3.78	9.18	9.99	10.7
	ENSG00000048052.21	HDAC9	0.58	0.41	0.76	1.85	1.33	2.08
	ENSG00000049089.15	COL9A2	0.4	0.79	1.7	3.36	3.73	3.97
	ENSG00000053918.16	KCNQ1	3.53	3.8	5.65	16.19	17.98	14.23
	ENSG00000055118.14	KCNH2	0.08	0.06	0.05	0.39	0.37	0.5
	ENSG00000055163.20	CYFIP2	0.12	0.32	0.52	0.42	0.91	0.91
	ENSG00000057252.13	SOAT1	56.58	41.64	39.36	113.77	92.96	111.29
	ENSG00000057657.17	PRDM1	6.27	4.73	5.66	11.37	10.57	12.1
	ENSG00000062282.15	DGAT2	3.35	2.13	3.21	10.34	7.8	7.06
	ENSG00000063180.9	CA11	1.53	1.31	5.86	5.69	6.78	8.8
	ENSG00000064300.9	NGFR	0.04	0.03	0.06	0.49	0.42	0.48
	ENSG00000067141.17	NEO1	0.91	0.93	1.27	1.55	1.19	1.85
	ENSG00000068985.5	PAGE1	7.53	6.34	9.29	257.65	299.54	266.64
	ENSG00000071246.11	VASH1	0.21	0.3	0.18	2.3	2.42	2.14
	ENSG00000072163.19	LIMS2	3.15	3.36	2.64	9.18	9.47	8.98
	ENSG00000073146.16	MOV10L1	0.54	0.38	0.43	2.41	2.11	1.73
	ENSG00000073756.12	PTGS2	3.69	1.98	1.96	13.11	12.87	16.11
	ENSG00000074370.18	ATP2A3	1.75	1.64	1.7	5.52	6.25	5.56
	ENSG00000078081.8	LAMP3	0.82	0.81	0.86	4.09	3.17	4.05
	ENSG00000078269.15	SYNJ2	3.41	3.82	3.55	7.57	7.14	7.03
	ENSG00000078900.15	TP73	0.46	0.16	0.28	0.88	0.8	0.87
	ENSG00000080573.7	COL5A3	0.05	0.09	0.14	0.27	0.29	0.2
	ENSG00000084628.10	NKAIN1	0.79	0.45	0.36	1.28	1.18	1.42
	ENSG00000084636.18	COL16A1	1.94	3.08	2.94	8.13	10.43	8.41
	ENSG00000084731.15	KIF3C	1.57	0.82	1.19	6	3.9	3.17
	ENSG00000085831.15	TTC39A	1.83	1.03	1.67	4.75	3.99	3.47
	ENSG00000086205.18	FOLH1	0.53	0.13	0.09	7.76	9.04	10.81
	ENSG00000087253.13	LPCAT2	1.95	2.7	1.2	2.21	4.94	3.77
	ENSG00000087510.7	TFAP2C	0.73	0.46	0.35	1.18	1.47	1.08
	ENSG00000088538.13	DOCK3	0.13	0.2	0.13	0.29	0.41	0.4
	ENSG00000088543.15	C3orf18	1.08	0.67	1.32	3.05	3.5	3.3
	ENSG00000088854.12	C20orf194	0.27	0.22	0.27	0.65	0.76	0.64
	ENSG00000089723.10	OTUB2	0.74	0.57	0.44	1.11	1.13	1.1
	ENSG00000090530.10	P3H2	4.71	4.25	5.73	18.02	15.65	15.92
	ENSG00000091262.15	ABCC6	0.79	0.34	0.96	1.9	2.24	2.27
	ENSG00000091986.15	CCDC80	3.14	2.73	3.97	9.88	10.46	10.41
	ENSG00000092068.20	SLC7A8	1.13	1.9	0.9	5.78	4.49	5.3
	ENSG00000099282.10	TSPAN15	3.09	3.82	5.47	9.97	10.81	9.64
	ENSG00000099337.5	KCNK6	0.51	0.36	0.48	1.18	1.16	1.33
	ENSG00000100027.15	YPEL1	0.26	0.07	0.1	0.58	0.82	3.1
	ENSG00000100033.16	PRODH	1.27	2.03	2.67	5.5	6.66	4.48
	ENSG00000100290.3	BIK	3.46	4.91	4.99	11.12	14.78	11.46
	ENSG00000100342.20	APOL1	0.83	0.43	0.96	1.2	2.62	2.19
	ENSG00000100767.16	PAPLN	4.89	5.07	5.47	10.63	10.93	10.6
	ENSG00000100784.12	RPS6KA5	2.48	1.56	2.56	5.81	4.24	5.58
	ENSG00000100867.14	DHRS2	1.23	0.91	1.21	4.02	5.08	4.05
	ENSG00000101076.16	HNF4A	0.6	0.45	0.74	2.94	3.32	2.29
	ENSG00000101265.16	RASSF2	0.88	0.64	0.83	2.37	2.02	2.05
	ENSG00000101276.16	SLC52A3	0.2	0.22	0.32	1.27	0.95	0.79
	ENSG00000101680.15	LAMA1	4.14	3.72	4.02	46.54	47.1	42.66
	ENSG00000102048.15	ASB9	4.7	6.38	5.11	15.49	17.05	14.94
	ENSG00000102174.9	PHEX	0.15	0.07	0.07	0.78	0.71	0.59
	ENSG00000102362.15	SYTL4	0.44	0.35	0.45	1.4	1.27	0.94
	ENSG00000103811.16	CTSH	3.84	2.38	4.32	26.79	31.26	29.94
	ENSG00000104081.14	BMF	0.47	1.8	1.14	2.63	2.52	2.29
	ENSG00000104213.12	PDGFRL	1.1	1.91	1.48	4.56	4.62	4.23
	ENSG00000104361.10	NIPAL2	0.05	0.06	1.67	1.7	2.47	1.82
	ENSG00000104833.12	TUBB4A	1.79	2.44	1.97	4.56	3.45	5.02
	ENSG00000104870.12	FCGRT	0	0.72	0.2	2.49	1.97	1.56
	ENSG00000105048.17	TNNT1	5.02	4.78	6.87	17.28	23.84	17.97
	ENSG00000105246.6	EBI3	0.83	0.57	0.86	1.58	2.62	2.23
	ENSG00000105255.11	FSD1	2.17	2.19	3.65	11.63	12.8	12.3
	ENSG00000105290.12	APLP1	4.05	6.08	9.82	9.86	12.65	11.61
	ENSG00000105383.15	CD33	0.39	0.24	0.52	6.52	8.02	6.31
	ENSG00000105696.9	TMEM59L	0.08	0.32	0.11	1.03	0.52	0.7
	ENSG00000106004.5	HOXA5	0.85	1.19	0.98	2.79	3.14	3.29
	ENSG00000106688.12	SLC1A1	5.47	4.73	3.9	13	13.54	13.16
	ENSG00000106780.9	MEGF9	3.71	3.13	2.5	7.92	7.95	8.07
	ENSG00000106829.18	TLE4	6.83	6.15	5.81	17.08	16.13	21.75
	ENSG00000106991.13	ENG	0.31	0.89	0.82	10.37	10.28	9.78
	ENSG00000107099.15	DOCK8	2.59	1.72	2.71	8.29	9.87	9.05
	ENSG00000107249.23	GLIS3	0.27	0.09	0.36	2.42	1.92	1.83
	ENSG00000107796.13	ACTA2	3.98	3.3	5.3	10.51	8.46	8.1
	ENSG00000108176.15	DNAJC12	12.01	11.44	13.16	29.24	26.21	28.35
	ENSG00000108375.12	RNF43	0.04	0.03	2.34	0.99	0.91	1.2
	ENSG00000108602.18	ALDH3A1	31.17	40	44.36	85.56	109.22	88.18
	ENSG00000108797.12	CNTNAP1	3.79	4.01	3.35	8.81	10.28	8.62
	ENSG00000109944.10	JHY	0	0	0	1.06	1.13	1.03
	ENSG00000110195.13	FOLR1	7.44	8.92	14.38	28.41	23.64	25.18
	ENSG00000110427.15	KIAA1549L	0	0	0	0.04	0.04	0.07
	ENSG00000110723.12	EXPH5	0.38	0.36	0.22	0.79	0.52	0.74
	ENSG00000110799.13	VWF	0.01	0	0.02	0.16	0.16	0.1
	ENSG00000110811.20	P3H3	2.46	2.53	6.54	8.12	8.93	6.57
	ENSG00000111700.12	SLCO1B3	2.95	1.59	1.92	6.51	5.77	7.24
	ENSG00000111816.8	FRK	0.14	0.1	0.13	0.7	0.63	0.73
	ENSG00000112297.15	CRYBG1	0.12	0.14	0.08	0.72	0.79	0.81
	ENSG00000112769.19	LAMA4	0.07	0	0	0.25	0.12	0.78
	ENSG00000112812.16	PRSS16	2.51	1.57	3.07	4.08	6.87	3.76
	ENSG00000112852.6	PCDHB2	0.45	0.39	0.26	2.4	2.43	2.92
	ENSG00000113657.13	DPYSL3	0.7	1.04	1.54	36.6	38.12	36.94
	ENSG00000114405.10	C3orf14	2.21	1.14	3.19	7.07	8.11	8.93
	ENSG00000115295.20	CLIP4	3.4	2.53	2.58	7.62	7.24	10.09
	ENSG00000115363.14	EVA1A	0.21	0	1.2	2.55	1.04	2.34
	ENSG00000115896.16	PLCL1	0.01	0.04	0.02	0.23	0.16	0.18
	ENSG00000116299.17	KIAA1324	0.21	0.36	0.52	0.99	0.87	0.81
	ENSG00000116574.6	RHOU	6.58	5.16	6.86	13.44	13.6	14.67
	ENSG00000116833.14	NR5A2	0	0	0	0.76	0.72	0.45
	ENSG00000117226.12	GBP3	0.96	0.69	1.48	3.8	2.52	4.6
	ENSG00000117266.15	CDK18	7.48	7.38	8.69	18.69	17.97	17.81
	ENSG00000117519.16	CNN3	6.16	6.13	6.7	15.13	13.57	18.2
	ENSG00000118276.11	B4GALT6	1.35	0.6	0.36	1.25	1.35	1.33
	ENSG00000118523.6	CCN2	7.3	7.44	6.81	12.83	15.03	21.89
	ENSG00000119771.15	KLHL29	2.48	2.29	2.26	7.99	8.51	8.62
	ENSG00000119888.10	EPCAM	2.34	2.09	1.91	8.54	8.9	7.18
	ENSG00000120068.6	HOXB8	2.83	2.83	2.68	8.18	7.53	8.97
	ENSG00000121753.12	ADGRB2	1.94	2.75	2.3	9.75	11.62	8.64
	ENSG00000121769.7	FABP3	3.78	4.85	7.48	12.89	13.78	12.5
	ENSG00000121895.8	TMEM156	8.31	6.24	5.62	15.27	10.57	12.27
	ENSG00000121900.19	TMEM54	10.33	10.92	15.37	26.32	31.6	26.69
	ENSG00000122176.12	FMOD	0	0.04	0.04	3.18	2.71	3.04
	ENSG00000122547.11	EEPD1	0.24	0.52	0.6	5.92	6.01	5.52
	ENSG00000123095.6	BHLHE41	0.07	0.03	0.04	0.38	1.1	0.21
	ENSG00000124102.5	PI3	8.32	7.87	12.2	39.51	36.98	41.86
	ENSG00000124171.9	PARD6B	1.04	1.08	0.81	1.75	1.59	2.07
	ENSG00000124257.6	NEURL2	0.07	0.23	0	0.93	1.58	0.5
	ENSG00000124406.16	ATP8A1	0.95	0.76	0.73	3.06	3.13	6.47
	ENSG00000124429.18	POF1B	0.13	0.01	0.12	1.18	0.86	0.92
	ENSG00000124920.13	MYRF	0.68	0.74	0.62	2.54	3.19	2.73
	ENSG00000125266.7	EFNB2	1.33	1.58	1.26	3.59	3.56	3.88
	ENSG00000125378.16	BMP4	3.83	2.86	3.27	7.17	7.89	5.91
	ENSG00000125637.15	PSD4	2.39	2.89	3.37	5.65	7.7	6.33
	ENSG00000125740.14	FOSB	5.25	7.25	6.32	35.35	31.49	32.05
	ENSG00000125864.14	BFSP1	1.97	1.97	1.68	5.05	4.6	5.17
	ENSG00000126970.16	ZC4H2	0	0	0	0.64	0.27	0.54
	ENSG00000127129.10	EDN2	0.92	0.83	1.04	2.42	3.73	2.97
	ENSG00000127561.15	SYNGR3	1.39	0.96	1.33	3.39	2.23	2.51
	ENSG00000128266.9	GNAZ	1.32	1.63	1.43	3.81	2.78	3.34
	ENSG00000128298.17	BAIAP2L2	0.34	0.09	0.11	3.52	3.6	3.16
	ENSG00000128510.12	CPA4	4.12	2.2	1.35	15.27	14.43	14.04
	ENSG00000128591.15	FLNC	0.58	0.58	0.62	5.45	6.66	4.79
	ENSG00000128604.20	IRF5	1.53	2.03	3	5.11	5.46	4.77
	ENSG00000128791.12	TWSG1	8.7	8.08	7.07	17.44	20.1	21.91
	ENSG00000128872.10	TMOD2	0.07	0.02	0.08	0.98	0.95	0.75
	ENSG00000130052.13	STARD8	0.24	0.12	0.2	0.95	0.69	0.65
	ENSG00000130433.7	CACNG6	0	0	0.04	0.91	0.73	0.25
	ENSG00000130513.6	GDF15	12.08	15.92	16.92	42.73	56.23	49.44
	ENSG00000130540.14	SULT4A1	0.07	0.11	0.09	1.46	1.04	1.29
	ENSG00000130558.19	OLFM1	4.94	3.92	7.05	14.65	13.45	15.18
	ENSG00000130720.13	FIBCD1	12.76	15.75	24.93	24.49	24.56	26.38
	ENSG00000130751.9	NPAS1	4.97	5.26	7.57	11.54	14.89	10.47
	ENSG00000130768.15	SMPDL3B	3.31	2.86	3.47	9.71	8.03	9.03
	ENSG00000131015.5	ULBP2	2.12	1.54	0.76	3.12	2.66	4.29
	ENSG00000131242.18	RAB11FIP4	0.77	0.8	1.29	1.82	1.71	1.66
	ENSG00000131378.14	RFTN1	0.55	0.53	1.38	2.55	1.63	2.09
	ENSG00000132357.14	CARD6	6.23	5.28	5.46	12.48	10.79	13.35
	ENSG00000132429.10	POPDC3	2.53	1.12	1.03	3.48	3	4.09
	ENSG00000132563.16	REEP2	1.5	1.16	1.29	3.8	4.7	3.75
	ENSG00000132688.11	NES	2.41	3.24	2.91	6.63	8	6.14
	ENSG00000133069.17	TMCC2	0.19	0.3	0.36	0.8	0.94	0.74
	ENSG00000133216.16	EPHB2	0.79	0.59	0.33	4.92	5.77	5.45
	ENSG00000133710.15	SPINK5	25.76	25.02	26.46	85.28	76.18	78.07
	ENSG00000133739.16	LRRCC1	0.76	0.94	0.51	2.7	2.05	2.21
	ENSG00000133805.15	AMPD3	0.27	0.39	0.25	1.42	1.26	1.6
	ENSG00000133943.20	DGLUCY	0.13	0.23	0.1	0.6	1.52	1.14
	ENSG00000134245.18	WNT2B	0.15	0.14	0.14	0.54	0.34	0.51
	ENSG00000134668.12	SPOCD1	0.13	0	0.05	0.77	0.67	0.53
	ENSG00000134864.10	GGACT	2.33	2.21	0.63	3.11	4.17	4.52
	ENSG00000135318.12	NT5E	0.3	0.73	0.85	2.47	1.71	1.25
	ENSG00000135338.14	LCA5	0.61	0.49	0.37	1.46	1.22	1.08
	ENSG00000135373.12	EHF	5.34	5.14	3.13	18.29	12.71	14.76
	ENSG00000135454.14	B4GALNT1	1.98	1.89	2.86	9.97	12.1	6.09
	ENSG00000135519.8	KCNH3	0.55	0.62	0.49	1.92	2.08	1.62
	ENSG00000135547.9	HEY2	0.36	0.24	0.53	3.31	3	2.37
	ENSG00000135828.11	RNASEL	0.16	0.2	0.11	0.75	0.78	0.57
	ENSG00000135842.17	FAM129A	0.88	0.69	0.84	1.71	2.43	2.22
	ENSG00000135919.13	SERPINE2	3.21	3.92	3.17	5.76	7.42	6.94
	ENSG00000136010.14	ALDH1L2	0.26	0.33	0.56	0.88	0.76	1.19
	ENSG00000136114.17	THSD1	0.08	0.04	0.07	0.46	0.25	0.56
	ENSG00000136869.15	TLR4	0.04	0.03	0.07	0.45	0.29	0.41
	ENSG00000136944.17	LMX1B	1.42	0.49	1.04	1.18	1.9	1.22
	ENSG00000137261.14	KIAA0319	0.39	0.61	0.4	1.22	1.06	1.02
	ENSG00000137393.9	RNF144B	3.89	2.93	2.92	9.33	8.68	8.53
	ENSG00000137501.17	SYTL2	0.44	0.53	0.3	0.95	1.22	1.3
	ENSG00000137561.4	TTPA	0.11	0.12	0.1	1.16	1.24	0.95
	ENSG00000137673.9	MMP7	7.11	4.92	7.81	25.63	20.61	23.6
	ENSG00000137819.13	PAQR5	7.65	5.25	3.57	15.01	14.41	18.29
	ENSG00000137962.13	ARHGAP29	12.5	10.2	8.71	25.16	22.11	26.76
	ENSG00000138131.4	LOXL4	0.36	0.45	0.42	1.4	1.59	1.2
	ENSG00000138193.15	PLCE1	0.65	1.12	0.5	3.76	3.45	3.93
	ENSG00000138311.17	ZNF365	0.02	0.18	0	0.36	0.25	0.36
	ENSG00000138604.10	GLCE	6.65	4.93	5.04	24.44	19.05	23.08
	ENSG00000138669.9	PRKG2	0.39	0.27	0.4	0.8	0.52	0.56
	ENSG00000139445.18	FOXN4	1.73	1.68	1.6	4.77	4.34	4.6
	ENSG00000139946.10	PELI2	0.01	0.02	0.19	2.62	1.29	1.77
	ENSG00000139971.15	ARMH4	0	0.03	0	0.14	0.24	0.26
	ENSG00000140285.10	FGF7	0.02	0.02	0.06	1.86	1.08	0.94
	ENSG00000140297.13	GCNT3	0	0.12	0.07	0.2	0.75	0.62
	ENSG00000140323.6	DISP2	0.05	0.39	0.04	0.08	0.35	0.4
	ENSG00000140391.14	TSPAN3	4.45	4.98	2.97	10.02	9	12.71
	ENSG00000140545.15	MFGE8	5.09	4.7	4.3	12.76	14.65	11.8
	ENSG00000141314.13	RHBDL3	0.51	0.52	0.62	0.92	1.24	0.72
	ENSG00000141441.16	GAREM1	0.42	0.39	0.44	3.52	1.41	1.73
	ENSG00000141542.11	RAB40B	10.38	10.66	10.46	23.82	24.81	22.83
	ENSG00000141668.10	CBLN2	1.32	1.04	0.86	2.17	3.22	3.59
	ENSG00000142408.4	CACNG8	0.05	0.1	0.04	0.26	0.42	0.43
	ENSG00000142552.8	RCN3	5.58	7.6	8.59	26.92	29.47	24.19
	ENSG00000142675.18	CNKSR1	4	4.63	3.59	7.38	5.85	7.17
	ENSG00000142910.16	TINAGL1	19.76	23.33	23.7	54.57	61.38	64.26
	ENSG00000143028.9	SYPL2	0.25	0.24	0.2	1.73	1.48	1.13
	ENSG00000143196.5	DPT	0	0	0	0.31	0.1	0.26
	ENSG00000143320.9	CRABP2	13.88	13.68	15.97	61.96	64.25	61.02
	ENSG00000143344.15	RGL1	0.19	0.19	0.15	0.96	0.78	0.9
	ENSG00000143375.15	CGN	0.98	0.86	1.47	1.78	2.1	2.38
	ENSG00000143515.17	ATP8B2	0.54	0.65	0.51	2.99	3.55	5.75
	ENSG00000143772.9	ITPKB	0.42	0.31	0.47	0.65	0.98	0.89
	ENSG00000144749.13	LRIG1	0.41	0.43	0.83	1.04	1.57	1.29
	ENSG00000144815.16	NXPE3	1.82	1.51	1.46	4.37	4.17	5.15
	ENSG00000145192.13	AHSG	0	0	0	0.35	0.16	0.22
	ENSG00000145284.12	SCD5	1.19	0.96	0.76	2.18	2.34	2.73
	ENSG00000145506.13	NKD2	1.81	0.92	1.71	3.51	4.46	3.17
	ENSG00000145536.15	ADAMTS16	0.31	11.96	0.29	1.01	1.18	1.25
	ENSG00000145569.6	OTULINL	5.65	4.8	4.53	11.88	10.63	11.53
	ENSG00000145861.8	C1QTNF2	0.03	0.05	0.12	0.7	0.45	0.63
	ENSG00000146021.15	KLHL3	0.13	1.29	0.25	0.83	0.41	0.65
	ENSG00000146090.16	RASGEF1C	0.06	0.03	0.03	0.42	0.35	0.66
	ENSG00000146411.5	SLC2A12	0.08	0.11	0.05	0.4	0.38	0.31
	ENSG00000146678.10	IGFBP1	0.46	0.29	0.37	2.74	3.93	3.96
	ENSG00000147168.12	IL2RG	0.11	0.34	0.2	1.21	1.15	1.05
	ENSG00000147251.15	DOCK11	1.73	1.07	1.12	4.12	3.86	4.32
	ENSG00000148082.10	SHC3	0	0.01	0.03	0.12	0.09	0.31
	ENSG00000148346.12	LCN2	4.99	4.73	4.44	30.49	25.44	27.68
	ENSG00000148655.15	LRMDA	2.01	1.09	1.23	3.57	3.66	3.68
	ENSG00000148677.6	ANKRD1	0.17	0.15	0.27	1.48	1.23	1.47
	ENSG00000149531.15	FRG1BP	2.42	1.94	2.14	5.64	5.93	6.31
	ENSG00000149573.9	MPZL2	2.03	1.86	1.83	3.67	5.47	5.01
	ENSG00000149679.11	CABLES2	2.57	2.51	2.11	6.68	5.79	5.96
	ENSG00000149927.18	DOC2A	0.45	0.93	0.4	1.3	1.2	1.38
	ENSG00000150394.14	CDH8	1.1	1.44	1.62	2.4	4.97	5.17
	ENSG00000151575.14	TEX9	3.09	1.71	1.78	5.44	4.04	7.2
	ENSG00000151692.15	RNF144A	0.47	0.46	0.82	1.16	1.76	1.22
	ENSG00000151917.18	BEND6	0.27	0.38	0.34	1.83	0.91	0.99
	ENSG00000152076.18	CCDC74B	0	0.05	0.23	0.9	1.49	0.65
	ENSG00000153071.15	DAB2	59.52	49.31	38.98	116.71	97.15	109.34
	ENSG00000153094.23	BCL2L11	4.32	2.67	3.91	6.36	4.83	5.8
	ENSG00000154146.13	NRGN	8.58	9.37	11.83	22.91	19.96	21.58
	ENSG00000154310.17	TNIK	0.19	0.22	0.02	0.86	0.71	0.51
	ENSG00000154529.10	CNTNAP3B	0.17	0.5	0.49	1.25	1.01	1.15
	ENSG00000154655.15	L3MBTL4	0.52	0.55	0.57	1.4	1.13	1.24
	ENSG00000154856.13	APCDD1	0	0	0	0.37	0.53	0.44
	ENSG00000154917.11	RAB6B	1.88	1.14	1.5	4.55	7.54	2.98
	ENSG00000155465.18	SLC7A7	0.32	0.26	0.1	2.25	1.47	1.42
	ENSG00000156011.17	PSD3	0.45	1.19	0.63	1.64	1.6	1.65
	ENSG00000156414.19	TDRD9	0	0	0.03	0.38	0.29	0.33
	ENSG00000156475.18	PPP2R2B	1.06	1.08	0.81	3.01	2.75	4.07
	ENSG00000156510.13	HKDC1	2.37	3.14	2.83	6.23	7.38	6.36
	ENSG00000157064.11	NMNAT2	0.15	0.28	0.01	2.88	2.49	1.52
	ENSG00000159231.6	CBR3	10.65	12.41	17.01	30.53	34.54	30.03
	ENSG00000159714.11	ZDHHC1	0.49	0.69	0.7	1.83	2.2	1.66
	ENSG00000159753.14	CARMIL2	0.55	0.41	0.37	2.08	1.82	1.48
	ENSG00000160145.15	KALRN	0.58	0.13	0.73	1.38	1.23	1.33
	ENSG00000160188.10	RSPH1	0.23	0.25	0.3	1.48	1.97	1.85
	ENSG00000160469.16	BRSK1	0.94	0.19	0.08	1.38	1.5	1.3
	ENSG00000160801.14	PTH1R	0.49	0.99	1.39	1.88	1.83	2.52
	ENSG00000160870.14	CYP3A7	0	0	0	1.09	0.66	0.83
	ENSG00000162366.8	PDZK1IP1	5.51	6.22	5.66	33.35	37.41	32.3
	ENSG00000162545.6	CAMK2N1	1.14	1.18	0.95	3.41	3.61	3.5
	ENSG00000162745.10	OLFML2B	0.1	0.23	0.12	0.45	0.49	0.66
	ENSG00000162777.17	DENND2D	0.19	0.27	0.54	2.57	1.55	1.51
	ENSG00000162894.12	FCMR	0.53	0.57	0.49	1.91	1.26	2.42
	ENSG00000162946.22	DISC1	0.63	0.08	0.14	0.53	0.69	0.68
	ENSG00000163131.11	CTSS	0.43	0.44	0.33	5.21	6.48	4.77
	ENSG00000163235.16	TGFA	1.91	1.58	1.3	3.34	2.77	2.79
	ENSG00000163347.6	CLDN1	10.2	10.82	8.73	39.43	34.88	42.94
	ENSG00000163362.11	INAVA	11.04	11.85	13.18	23.86	27.72	27.84
	ENSG00000163485.17	ADORA1	0.37	0.58	0.32	3.33	2.29	2.13
	ENSG00000163491.16	NEK10	1.63	0.78	0.66	2.14	2.53	1.78
	ENSG00000163508.12	EOMES	0.09	0.06	0.04	0.48	0.35	0.54
	ENSG00000163803.13	PLB1	0.07	0.05	0.39	1.25	2.17	1.3
	ENSG00000163975.12	MELTF	13.5	16.32	23.17	30.18	40.61	30.11
	ENSG00000163995.20	ABLIM2	1.18	1.49	1.05	2.59	2.58	1.61
	ENSG00000164061.5	BSN	0.03	0.03	0.01	0.09	0.09	0.07
	ENSG00000164089.9	ETNPPL	3.26	2.46	2.21	13.06	11.63	13.68
	ENSG00000164251.5	F2RL1	0.88	0.37	0.6	3.04	3.01	3.31
	ENSG00000164307.13	ERAP1	6.99	4.34	4.2	11.79	7.25	8.88
	ENSG00000164418.20	GRIK2	0.81	0.93	1.82	2.23	1.92	2.15
	ENSG00000164674.15	SYTL3	1.14	0.36	0.25	0.94	1.04	0.91
	ENSG00000164749.11	HNF4G	0.01	0.01	0	0.33	0.21	0.15
	ENSG00000164825.4	DEFB1	19.84	23.51	46.84	69.73	94.22	61.46
	ENSG00000164949.8	GEM	0	0.03	0	0.31	2.12	0.26
	ENSG00000165152.9	TMEM246	1.2	0.76	0.63	2.49	2.29	2.6
	ENSG00000165164.14	CFAP47	0	0	0	0.11	0.16	0.11
	ENSG00000165168.7	CYBB	1.42	0.68	0.63	2.13	1.64	2.26
	ENSG00000165215.6	CLDN3	1.75	1.07	2.49	3.71	4.69	3.46
	ENSG00000165512.5	ZNF22	1.55	1.21	1.37	6.06	4.52	6.4
	ENSG00000165591.6	FAAH2	1.81	0.99	0.77	2.49	2.3	2.54
	ENSG00000165650.12	PDZD8	9.84	6.77	5.85	15.34	14.72	16.42
	ENSG00000165730.16	STOX1	0.64	0.27	0.43	2.23	1.42	2.31
	ENSG00000165895.19	ARHGAP42	1.05	0.46	0.54	1.71	2.32	1.64
	ENSG00000166008.5	MAGEA9	0.17	0.11	0.16	1.53	1.39	2.16
	ENSG00000166147.13	FBN1	9.55	8.6	5.99	21.22	21.11	18.83
	ENSG00000166313.19	APBB1	1.72	1.39	2.22	5.87	5.57	6.05
	ENSG00000166450.13	PRTG	4.31	3.49	2.32	8.85	8.2	7.45
	ENSG00000166501.13	PRKCB	0.9	1.05	1	2.14	3.34	1.98
	ENSG00000166510.14	CCDC68	0.78	0.58	0.76	4.2	4.16	2.49
	ENSG00000166801.15	FAM111A	7.31	5.36	5.57	16.14	12.69	18.25
	ENSG00000166963.13	MAP1A	0.07	0.06	0.08	0.61	0.5	0.28
	ENSG00000167157.11	PRRX2	2.3	2.02	2.46	5.04	6.28	5.23
	ENSG00000167191.12	GPRC5B	1.98	2.65	1.66	4.8	5.56	5.43
	ENSG00000167311.13	ART5	0.17	0.29	0.12	1.59	1.61	0.94
	ENSG00000167642.13	SPINT2	6.38	0.63	5.99	11.65	10.55	13.32
	ENSG00000167646.13	DNAAF3	0.07	0.67	0.25	2.41	2.27	2.12
	ENSG00000167711.13	SERPINF2	0.46	0.64	0.72	2.04	2.96	1.95
	ENSG00000167779.9	IGFBP6	7.16	9.79	18.87	26.67	36.23	31.18
	ENSG00000167861.16	HID1	2.35	2.63	6.46	6.96	6.14	9.7
	ENSG00000167994.12	RAB3IL1	5.26	6.72	6.46	12.87	15.01	13.14
	ENSG00000167996.16	FTH1	6052.44	7327.95	7734.39	13408.4	15966.9	14228.1
	ENSG00000168243.11	GNG4	3.43	2.71	3.48	9.16	8.7	9.88
	ENSG00000168398.6	BDKRB2	2.62	2.84	3.47	8.39	9.27	9.14
	ENSG00000168528.12	SERINC2	6.77	7.25	9.06	17.14	17.27	15.99
	ENSG00000168539.4	CHRM1	0.17	0.11	0.34	1.36	1.24	0.99
	ENSG00000168631.12	MUCL3	0.01	0.02	0.01	0.13	0.1	0.12
	ENSG00000169302.16	STK32A	0	0	0	0.38	0.32	0.19
	ENSG00000169740.14	ZNF32	5.18	6.03	6.66	13.77	12.01	11.8
	ENSG00000169891.18	REPS2	0.31	0.12	0.34	1.87	1.98	4.19
	ENSG00000169994.18	MYO7B	0.04	0.18	0.22	0.85	0.57	0.59
	ENSG00000170075.9	GPR37L1	0.13	0.12	0.1	0.35	0.31	0.26
	ENSG00000170382.12	LRRN2	1.87	2.54	2.01	5.67	5.83	5.45
	ENSG00000170439.7	METTL7B	0.27	0.2	0.38	1.48	0.75	1.14
	ENSG00000170477.13	KRT4	0.51	0.6	0.87	28.29	27.05	29.52
	ENSG00000170509.12	HSD17B13	0.49	0.21	0.17	4.78	4.33	5.49
	ENSG00000170571.12	EMB	5.74	5.12	4.64	11.94	11.35	11.87
	ENSG00000170608.3	FOXA3	0	0	0	0.25	0.27	0.2
	ENSG00000170629.14	DPY19L2P2	0.47	0.42	0.48	1.36	1.1	1.29
	ENSG00000170689.10	HOXB9	3.1	2.6	3.14	13.17	12.45	13.93
	ENSG00000170703.15	TTLL6	0.2	0.44	0.22	0.84	0.85	0.87
	ENSG00000170921.15	TANC2	5.4	3.5	2.62	6	8.98	4.7
	ENSG00000171130.18	ATP6V0E2	15.94	15.06	21.03	38.51	42.72	38.29
	ENSG00000171388.12	APLN	0.15	0.37	0.25	0.83	1.19	0.76
	ENSG00000171401.15	KRT13	1.18	0.6	1.11	3.55	4.86	4.34
	ENSG00000171428.14	NAT1	1.58	0.78	1.63	4.38	3.26	3.27
	ENSG00000171450.5	CDK5R2	0.15	0.12	0.11	0.61	0.58	0.35
	ENSG00000171488.15	LRRC8C	0.32	0.14	0.21	1.33	1.4	1.5
	ENSG00000172086.8	KRCC1	2.92	2.14	2.99	6.33	5.46	6.95
	ENSG00000172159.16	FRMD3	0	0	0	0.29	0.17	0.16
	ENSG00000172260.15	NEGR1	0.38	0.37	0.23	1.65	1.84	1.77
	ENSG00000172346.15	CSDC2	0.63	1.07	0.76	5.5	7.62	5.44
	ENSG00000172348.14	RCAN2	0.03	0	0	0.82	0.74	0.61
	ENSG00000172594.13	SMPDL3A	0.42	0.59	0.54	1.92	1.84	0.97
	ENSG00000172731.14	LRRC20	2.67	2.94	3.1	6.6	7.49	6.8
	ENSG00000172824.16	CES4A	0.46	0.32	0.79	1.67	1.57	2.32
	ENSG00000173432.12	SAA1	2.71	4.32	5.11	8.71	11.57	9.31
	ENSG00000173698.18	ADGRG2	1.94	1.47	1.16	6.58	4.76	6.11
	ENSG00000173702.7	MUC13	0.11	0.02	0.02	1.91	2.75	2.48
	ENSG00000173705.9	SUSD5	0.04	0.22	0.06	0.23	0.23	0.63
	ENSG00000173805.15	HAP1	0.31	0.15	0.21	0.72	1.89	0.96
	ENSG00000173926.6	2022-03-03	2.19	2.03	1.37	10.57	9.62	9.42
	ENSG00000174332.5	GLIS1	0.36	0.39	0.34	0.81	0.95	0.9
	ENSG00000174827.13	PDZK1	0.21	0.23	0.35	0.98	0.78	0.68
	ENSG00000175040.6	CHST2	3.12	3.51	4.07	8.56	11.03	8.45
	ENSG00000175294.5	CATSPER1	0	0	0.11	0.52	0.58	0.4
	ENSG00000175352.11	NRIP3	0.82	0.64	0.95	1.48	1.49	2.28
	ENSG00000175445.16	LPL	8.61	7.35	6.24	20.75	17.11	19.79
	ENSG00000175697.10	GPR156	0.6	0.75	0.4	0.97	1.58	1.43
	ENSG00000176597.12	B3GNT5	2.52	1.34	1.39	3.78	3.15	4.03
	ENSG00000176746.6	MAGEB6	0.14	0.06	0.06	1.1	0.92	1.06
	ENSG00000177181.15	RIMKLA	0.01	0.17	0	0.09	0.41	0.07
	ENSG00000177409.12	SAMD9L	0.29	0.44	0.31	1.48	1.47	1.23
	ENSG00000177675.8	CD163L1	0.1	0.14	1.13	4.47	4.67	2.62
	ENSG00000177679.16	SRRM3	0.38	0.55	0.56	4.07	5.61	4.29
	ENSG00000178401.16	DNAJC22	1.83	2.23	2.28	4.1	6.11	5.08
	ENSG00000178597.7	PSAPL1	0.25	0.5	0.33	0.77	0.75	0.81
	ENSG00000179023.8	KLHDC7A	0.19	0.33	0.34	0.87	0.99	0.72
	ENSG00000179388.9	EGR3	0	0	0	0.1	0.26	0.88
	ENSG00000179869.15	ABCA13	1.05	1.18	1.09	9.39	8.81	8.81
	ENSG00000179915.23	NRXN1	0	0.05	0	0.81	0.41	0.49
	ENSG00000180537.13	RNF182	4.41	4.46	3.21	15.23	13.87	15.87
	ENSG00000180592.16	SKIDA1	0.14	0.15	0.29	0.6	0.53	1.4
	ENSG00000180611.7	MB21D2	3.48	3.49	2.55	7.19	6.9	7.52
	ENSG00000180787.6	ZFP3	0.04	0	0.01	0.15	0.11	0.23
	ENSG00000180861.9	LINC01559	0	0.02	0	0.31	0.28	0.3
	ENSG00000181104.7	F2R	0.46	0.66	0.61	3.75	3.47	4.53
	ENSG00000181143.15	MUC16	1.64	1.51	1.32	6.01	4.61	5.44
	ENSG00000181634.8	TNFSF15	0	0	0	0.08	0.04	0.07
	ENSG00000181690.8	PLAG1	0.05	0.02	0.05	0.15	0.3	0.24
	ENSG00000182179.13	UBA7	0.32	0.63	0.54	2.11	1.15	1.29
	ENSG00000182484.15_PAR_Y	WASH6P	0.05	0.04	0.04	0.11	0.06	1
	ENSG00000182557.8	SPNS3	0	0	0	1.16	2.42	0.31
	ENSG00000182795.13	C1orf116	1.9	1.5	1.88	6.56	5.55	6.44
	ENSG00000182870.8	GALNT9	0.04	0.63	0.79	2.36	1.91	2.01
	ENSG00000183098.11	GPC6	0.11	0.03	0.1	0.42	0.45	0.32
	ENSG00000183305.13	MAGEA2B	0.2	0	0.24	0.89	0.35	0.59
	ENSG00000183307.3	TMEM121B	0	0.04	0.01	0.21	0.26	0.21
	ENSG00000183317.17	EPHA10	0.43	0.7	0.58	2.06	2.09	1.6
	ENSG00000183607.10	GKN2	0.25	0.33	0.23	3.06	3.1	4.26
	ENSG00000183801.8	OLFML1	10.86	10.63	8.97	25.07	19.92	21.43
	ENSG00000183900.4	AC099522.1	0.1	0	0	0.16	0.56	0.67
	ENSG00000184194.5	GPR173	1.48	1.83	2.12	5.95	5.61	6.02
	ENSG00000184226.15	PCDH9	0.4	0.83	0.26	0.83	0.71	0.96
	ENSG00000184349.13	EFNA5	1.66	1.94	1.18	3.97	2.82	3.62
	ENSG00000184451.5	CCR10	0.47	0.69	0.28	1.19	2.01	1.49
	ENSG00000184489.11	PTP4A3	0.46	0.39	0.42	5.05	3.76	3.53
	ENSG00000184500.15	PROS1	8.8	5.43	6.36	15.47	16.73	16.9
	ENSG00000184635.15	ZNF93	1.41	0.84	1.36	2.41	1.59	2.51
	ENSG00000184669.9	OR7E14P	0.31	0.5	0.93	1.79	2.28	2
	ENSG00000185002.10	RFX6	0	0	0	0.16	0.11	0.12
	ENSG00000185010.15	F8	1.63	1.15	0.88	1.93	2.28	2.38
	ENSG00000185015.8	CA13	0.19	0.2	0.1	1.25	1.43	1.08
	ENSG00000185247.15	MAGEA11	0.14	0.03	0	0.81	1.5	1.48
	ENSG00000185467.7	KPNA7	0.27	0.35	0.24	1.11	1.58	0.92
	ENSG00000185483.12	ROR1	0.35	0.68	0.51	1.11	0.7	0.84
	ENSG00000185519.9	FAM131C	0.31	0.28	0.7	2.18	2.2	1.49
	ENSG00000185532.17	PRKG1	0.04	0.17	0.06	0.29	0.09	0.48
	ENSG00000186862.19	PDZD7	0.42	0.5	0.96	1.31	1.57	1.78
	ENSG00000187210.14	GCNT1	0.47	0.26	0.09	2.01	1.61	1.56
	ENSG00000187554.13	TLR5	0.04	0	0.03	0.43	0.75	0.48
	ENSG00000187800.13	PEAR1	0.6	1.06	1.39	2.13	3.21	1.92
	ENSG00000188051.7	TMEM221	0.16	0.15	0.23	0.69	0.8	0.73
	ENSG00000188112.9	C6orf132	3.4	4.66	5.5	8.07	13	7.21
	ENSG00000188158.15	NHS	0.2	0.07	0.37	0.68	0.6	0.49
	ENSG00000188322.5	SBK1	0.07	0.13	0.22	0.5	0.51	0.37
	ENSG00000188338.15	SLC38A3	0.81	0.57	0.7	3.15	3.53	1.54
	ENSG00000188385.11	JAKMIP3	0.38	0.26	0.25	0.73	0.61	0.56
	ENSG00000188517.16	COL25A1	0.05	0.06	0.1	0.26	0.94	0.33
	ENSG00000188613.7	NANOS1	0.87	0.31	1.34	1.81	2.6	2.16
	ENSG00000188641.13	DPYD	2.85	2.99	2.34	5.24	6	6.57
	ENSG00000188883.4	KLRG2	0.06	0.06	0.1	0.43	0.34	0.76
	ENSG00000189223.14	PAX8-AS1	1.14	1.43	0.84	2.68	3.22	3.35
	ENSG00000189420.8	ZFP92	0.01	0.04	0.03	0.18	0.18	0.14
	ENSG00000196081.9	ZNF724	0.76	0.29	0.43	1.32	1.53	1.21
	ENSG00000196562.14	SULF2	0.9	0.93	0.44	2.16	2.5	2.88
	ENSG00000197696.10	NMB	0	0	0.21	6.31	8.48	8.2
	ENSG00000197977.4	ELOVL2	0.09	0.01	0.07	0.88	0.69	0.91
	ENSG00000198133.8	TMEM229B	0	0	0	0.17	0.03	0.15
	ENSG00000198223.16	CSF2RA	13.36	19.8	15.54	34.72	40.18	35.88
	ENSG00000198223.16_PAR_Y	CSF2RA	0.78	1.12	1.09	2.26	2.11	2.37
	ENSG00000198286.9	CARD11	0.73	0.43	0.76	3.99	2.92	2.59
	ENSG00000198478.8	SH3BGRL2	0.25	0.12	0.07	0.83	0.64	0.79
	ENSG00000198513.11	ATL1	1.95	1.64	1.84	16.82	15.31	16.91
	ENSG00000198610.11	AKR1C4	0	0	0.11	1.37	1.02	0.96
	ENSG00000198626.16	RYR2	1.2	1.11	0.53	2.46	2.5	1.44
	ENSG00000198691.13	ABCA4	1	0.45	0.47	0.96	1.19	0.96
	ENSG00000198794.12	SCAMP5	1.11	0.96	1.43	5.19	4.63	5.15
	ENSG00000204540.10	PSORS1C1	3.84	6.6	3.87	17.85	14.68	27.14
	ENSG00000204618.8	RNF39	0.5	0.64	0.89	1.92	2.28	1.9
	ENSG00000205189.12	ZBTB10	0.71	0.24	0.18	0.96	1.26	1.61
	ENSG00000205413.8	SAMD9	2.48	2.12	1.35	5.46	3.6	4.39
	ENSG00000205593.12	DENND6B	0.54	0.32	0.93	1.46	1.54	0.92
	ENSG00000205744.10	DENND1C	1.55	1.56	2.59	2.71	4.68	3.57
	ENSG00000205795.4	CYS1	0	0	0	0.56	0.1	0.11
	ENSG00000206532.2	AC117402.1	0	0.09	0	2.18	2.86	2.51
	ENSG00000213694.5	S1PR3	2.12	1.61	1.42	5.22	5.65	5.4
	ENSG00000214049.7	UCA1	0	0.16	0.17	1.41	1.1	0.9
	ENSG00000214425.7	LRRC37A4P	2.35	1.9	1.71	4.83	4.47	4.83
	ENSG00000214694.11	ARHGEF33	0.08	0.45	0.06	1.1	1.1	0.93
	ENSG00000214944.9	ARHGEF28	1.62	1.17	1.59	3.77	3.48	3.26
	ENSG00000215182.6	MUC5AC	1.21	0.89	1.05	6.16	6.23	4.89
	ENSG00000221843.4	C2orf16	0.16	0.12	0.16	0.34	0.63	0.34
	ENSG00000221890.4	NPTXR	0.2	0.18	0.16	1.71	2.04	1.36
	ENSG00000223572.9	CKMT1A	0.79	1.49	1.26	4.22	2.44	1.78
	ENSG00000224259.6	LINC01133	3.27	3.11	2.09	8.57	6.67	8.78
	ENSG00000224831.3	TMEM183B	0.07	0.19	0.14	1.39	0.47	0.78
	ENSG00000225206.9	MIR137HG	0	0.14	0.51	0.56	1.04	0.84
	ENSG00000225411.3	CR786580.1	0.35	0.23	0.12	4.37	3.65	3.65
	ENSG00000225465.8	RFPL1S	0.99	0.29	0.46	1.11	1.18	1.26
	ENSG00000225950.8	NTF4	0	0	0	0.83	0.46	0.33
	ENSG00000226496.2	LINC00323	0.06	0.37	0.06	0.57	2.4	1.15
	ENSG00000226975.1	AC006987.6	0	0	0	2.61	2.91	2.01
	ENSG00000227051.6	C14orf132	0.41	0.41	1.16	1.13	1.55	1.09
	ENSG00000230606.6	AC159540.1	1.17	2.07	1.33	4.11	3.77	2.64
	ENSG00000230882.1	AC005077.4	0	0	0.02	0.18	0.12	0.14
	ENSG00000231107.1	LINC01508	0	0.07	0	0.91	1.09	1.03
	ENSG00000231411.1	DUX4L31	0	0	0.06	1.58	2.64	1.34
	ENSG00000231528.2	FAM225A	0.23	0.12	0.21	0.62	0.54	0.43
	ENSG00000232815.1	DUX4L50	0	0	0	2.24	1.42	3.37
	ENSG00000232859.9	LYRM9	2.02	2.75	1.3	3.18	3.76	2.81
	ENSG00000232940.5	HCG25	3.22	0.25	0.21	11.97	1.8	14.75
	ENSG00000233429.9	HOTAIRM1	2.13	4.21	5.56	12.42	12.42	11.06
	ENSG00000234444.10	ZNF736	0.82	0.5	0.35	1.01	0.78	2.13
	ENSG00000234465.11	PINLYP	0.21	0	0.57	0.46	0.4	0.77
	ENSG00000235531.9	MSC-AS1	0.49	0.42	0.4	3.45	2.25	4.73
	ENSG00000236138.4	DUX4L26	0	0.1	0.05	2.46	2.99	1.23
	ENSG00000236882.7	LINC01554	0.21	0.13	0.18	1.36	0.8	0.59
	ENSG00000237438.7	CECR7	0.45	0.39	0.56	1.54	1.21	1.43
	ENSG00000237517.9	DGCR5	0.01	0.03	0.09	0.58	0.42	0.3
	ENSG00000237862.1	Z94160.1	0.74	0.59	0.86	1.88	1.43	3.2
	ENSG00000237943.6	PRKCQ-AS1	0	0.06	0	2.88	1.72	0.32
	ENSG00000238113.6	LINC01410	0	0.71	0.41	4.72	6.65	5.69
	ENSG00000238266.2	LINC00707	0.63	0.9	0.84	1.83	1.38	2.16
	ENSG00000240024.5	LINC00888	3.03	3.77	3.13	7.43	6.74	9.1
	ENSG00000240065.8	PSMB9	7.94	7.47	9.98	18.24	20.14	19.87
	ENSG00000240771.7	ARHGEF25	0.5	0.78	0.29	0.75	0.86	1.01
	ENSG00000241472.6	PTPRG-AS1	0	0.33	0	1.85	0.9	1.93
	ENSG00000241945.8	PWP2	1.12	0.08	0.03	9.87	1.2	7.31
	ENSG00000242082.2	SLC5A4-AS1	0.02	0.02	0.02	0.2	0.3	0.06
	ENSG00000243566.6	UPK3B	9.18	11.12	7.53	16.12	16.53	16.89
	ENSG00000243902.6	FP325335.1	0.04	0.52	0.13	0.96	0.54	0.72
	ENSG00000244128.6	LINC01322	0	0	0	1.16	1.93	1.96
	ENSG00000244468.1	AC093001.1	0.49	0.7	0.16	3.57	2.56	3.15
	ENSG00000245571.6	FAM111A-DT	1.89	1.59	2.31	3.28	3.04	6.51
	ENSG00000248405.10	PRR5-ARHGAP8	0	0	0	0.19	0.27	0.47
	ENSG00000248905.8	FMN1	0	0	0	0.01	0.05	0.41
	ENSG00000250510.8	GPR162	0.42	0.03	0	1.16	0.36	0.62
	ENSG00000251365.3	LINC02236	1.59	0.99	0.99	3.02	3.32	2.87
	ENSG00000251493.5	FOXD1	0	0.37	0.16	4.78	6.17	5.54
	ENSG00000253671.2	AC027117.1	0.63	0.43	0.12	2.43	2.29	3.39
	ENSG00000255367.3	AC127526.2	0.44	0.76	0.6	2.37	1.6	1.13
	ENSG00000255650.5	FAM222A-AS1	0.93	0.36	0.66	3.19	1.7	2.86
	ENSG00000257390.5	AC023055.1	0.43	0	0.15	3.39	0.75	3.57
	ENSG00000258964.1	AL137129.1	0	0.07	0	0.83	0.64	1.54
	ENSG00000259341.1	AC015660.1	2.32	1.81	2.76	4.79	5.44	8.96
	ENSG00000259952.1	AC009133.2	0	0	0	5.74	1.09	5.26
	ENSG00000259987.1	DUX4L46	0	0	0	0.59	1.97	1.12
	ENSG00000261052.5	SULT1A3	2.61	3.44	2.27	9.79	5.75	4.45
	ENSG00000261115.6	TMEM178B	0	0.01	0	0.16	0.08	0.24
	ENSG00000261305.2	AC005586.2	4.09	4.33	2.12	8.82	6.88	8.6
	ENSG00000261440.1	DUX4L45	0.07	0	0.13	2.59	4.06	1.34
	ENSG00000262877.4	AC110285.2	0.57	0.59	0.27	2.31	1.89	1.29
	ENSG00000264590.1	RN7SL512P	1.5	0.76	0.55	4.25	3.95	4.44
	ENSG00000264982.1	AC015563.2	0.09	0.13	0	0.76	0.68	1.04
	ENSG00000265735.1	RN7SL5P	56.7	67.73	114.58	75.54	73.37	181.95
	ENSG00000265933.5	LINC00668	1.41	4.02	3.08	4.81	10.03	7.12
	ENSG00000265962.1	GACAT2	2.24	1.56	4.56	7.64	7.71	7.11
	ENSG00000266074.8	BAHCC1	4.19	3.98	3.71	8.42	9.49	8.56
	ENSG00000266714.9	MYO15B	0.59	0.91	0.4	9.06	9.66	7.7
	ENSG00000267221.2	C17orf113	0.3	0.32	0.26	0.66	0.88	0.75
	ENSG00000267475.1	AC008736.2	1.28	2.2	0.46	4.75	5.99	6.28
	ENSG00000267508.5	ZNF285	0.16	0.16	0.59	0.48	0.8	1.04
	ENSG00000270038.1	AL133467.4	5	3.53	3.23	9.39	7.76	9.32
	ENSG00000272602.6	ZNF595	0.07	0.02	0	1.73	1.42	3.02
	ENSG00000273129.1	PACERR	0.2	0.27	0.09	1.11	1.85	0.98
	ENSG00000275004.4	ZNF280B	0.6	0.39	0.4	0.96	0.94	1.2
	ENSG00000275234.1	AC010503.4	1.46	2.61	1.64	4.48	5.19	4.11
	ENSG00000275410.5	HNF1B	3.81	2.42	3.45	7.58	6.56	7.42
	ENSG00000275793.1	RIMBP3	0.14	0.1	0.21	0.46	0.67	0.33
	ENSG00000277011.1	AC148477.4	0	0	0	0.45	0.13	0.11
	ENSG00000277363.5	SRCIN1	0.84	0.9	1.12	2.03	1.78	1.86
	ENSG00000277879.1	AL391988.1	0.49	0.44	0.32	1.9	1.67	1.34
	ENSG00000278071.1	AL161669.3	1.34	1.27	1.57	4.3	2.84	3.78
	ENSG00000279491.1	AP003733.4	0.28	0.11	0.18	0.45	0.98	0.9
	ENSG00000280087.1	AC011481.4	0	0	0	0.1	0.03	0.1
	ENSG00000280254.1	AC233723.2	0.78	0.98	0.6	1.44	2.16	2.13
	ENSG00000280916.2	FOXCUT	2.41	0.43	1.62	3.63	3.92	5.84
	ENSG00000281453.1	TGFB2-OT1	0	0	0.07	1.03	0.07	0.91
	ENSG00000281706.2	AL009179.1	0.92	1	0.9	2.25	2.37	2.14
	ENSG00000286134.1	AC114930.1	0.11	0.19	0.2	3.03	2.08	2.93
	novel.10079	novel.10079	0	0.89	0.37	13.94	10.35	21.93
	novel.12445	novel.12445	0	0.34	0	0.36	0.85	1.1
	novel.12452	novel.12452	2.03	1.71	1.61	4.04	6.99	6.03
	novel.13255	novel.13255	1.71	1.41	1.51	11.68	11.2	11.87
	novel.15326	novel.15326	0	0	0	1.5	1.09	1.67
	novel.1757	novel.1757	14.8	14.67	16.13	49.65	35.43	49.49
	novel.19152	novel.19152	0.92	0.79	0.7	2.47	2.44	1.89
	novel.23154	novel.23154	425.44	260.36	389.08	703.97	477.39	743.63
	novel.23157	novel.23157	0.58	1.07	0.43	1.96	1.89	1.75
	novel.23286	novel.23286	10.98	12.2	7.92	29.52	27.44	27.69
	novel.23288	novel.23288	14.63	11.66	19.17	43.51	36.05	38.41
	novel.23971	novel.23971	0	0	0	1.48	0.56	1.98
	novel.26243	novel.26243	0.35	0.16	0.16	5.41	5.9	4.76
	novel.26247	novel.26247	0.5	0.45	0.34	5.12	4.22	3.36
	novel.26263	novel.26263	0.26	0.24	0.13	11.92	5.23	9.48
	novel.26264	novel.26264	0.38	0.15	0.15	4.84	5.33	4.42
	novel.26269	novel.26269	0.86	0.33	0.23	14.98	16.08	21.39
	novel.27008	novel.27008	0	0	4.6	11.2	12.25	12.69
	novel.27012	novel.27012	2.06	1.62	1.46	4.93	3.15	5.39
	novel.27027	novel.27027	0.25	0.13	0	7.9	8.8	7.8
	novel.27030	novel.27030	0	0	0.45	4.66	3.44	4.87
	novel.27033	novel.27033	0.28	0.46	0.13	11.21	11.11	13.05
	novel.27034	novel.27034	0	0.85	0	13.07	14.4	13.53
	novel.27036	novel.27036	0	1.33	0	24.26	11.8	15.32
	novel.27037	novel.27037	0	0	0	7.07	1.95	3.72
	novel.27039	novel.27039	0.51	0.57	0.42	5.23	5.17	6.12
	novel.27040	novel.27040	0	0	0	12.47	20.4	37.87
	novel.27384	novel.27384	10.05	18.28	18.35	36.68	39.35	39.92
	novel.27941	novel.27941	0	0	0	2.82	3.25	8.2
	novel.8133	novel.8133	0.21	0.58	0.28	1.09	1.11	1.74
	novel.8134	novel.8134	0.23	0.33	0.54	1.5	1.52	1.32
	novel.8905	novel.8905	20.58	33.22	60.43	71.6	72.75	87.93
	novel.922	novel.922	1	1.03	1.34	2.64	3.14	2.75
	ENSG00000204775.4	KM-PA-2	0	0	0	3.77	0	0
	novel.23481	novel.23481	0	0	0	3.63	0	0
	ENSG00000003436.16	TFPI	44.35	41.26	30.51	13.62	11.09	12.58
	ENSG00000004848.8	ARX	0.65	1.22	0.8	0.41	0.44	0.34
	ENSG00000007372.22	PAX6	5.4	2.7	2.87	0.08	0.17	0.37
	ENSG00000011021.23	CLCN6	5.92	6.14	6.68	3.75	2.99	3.22
	ENSG00000011422.12	PLAUR	36.94	30.47	37.97	18.3	15.11	16.28
	ENSG00000012171.19	SEMA3B	66.98	81.91	100.55	37.09	46.48	38.82
	ENSG00000013619.14	MAMLD1	8.04	6.76	7.28	2.9	2.08	2.24
	ENSG00000018189.13	RUFY3	4.61	4.12	3.79	2.21	1.44	2.55
	ENSG00000019549.12	SNAI2	6.18	4.43	4.76	3.05	1.7	2.74
	ENSG00000023171.18	GRAMD1B	11.81	13.31	15.19	2.72	2.8	2.41
	ENSG00000027075.15	PRKCH	1.31	2.81	2.25	0.64	2.16	0.46
	ENSG00000050405.13	LIMA1	15.9	13.64	11.97	6.78	5.9	7.36
	ENSG00000056998.20	GYG2	1.26	1.11	1.11	0.06	0.15	0.13
	ENSG00000059804.16	SLC2A3	2.11	1.33	1.97	0.12	0.18	0
	ENSG00000060982.15	BCAT1	2.85	2.09	1.89	0.07	0.01	0.15
	ENSG00000064195.7	DLX3	1.1	1.17	1.11	0.25	0.61	0.22
	ENSG00000064393.16	HIPK2	1.74	1.08	1.04	0.97	0.83	0.59
	ENSG00000064692.19	SNCAIP	3.01	0.81	0.85	0	0.06	0
	ENSG00000068024.16	HDAC4	14.78	11.36	15.42	8.06	8.45	6.16
	ENSG00000068078.18	FGFR3	10.74	12.04	13.33	2.5	2.71	3.18
	ENSG00000069011.16	PITX1	114.85	109.75	130.24	60.93	64.12	66.98
	ENSG00000070404.10	FSTL3	273.69	317	384.36	130.07	156.09	145.53
	ENSG00000070915.9	SLC12A3	122.72	122.98	112.38	1.11	0.73	0.55
	ENSG00000073711.11	PPP2R3A	0.67	0.98	0.53	0.33	0.23	0.46
	ENSG00000079308.19	TNS1	9.29	6.38	7.8	1.75	2.35	1.67
	ENSG00000080345.17	RIF1	9.54	8.75	7.22	4.99	3.93	4.69
	ENSG00000082438.16	COBLL1	29.91	20.36	18.68	9.34	6.12	7.63
	ENSG00000082497.12	SERTAD4	1.25	0.67	0.56	0.17	0.05	0.32
	ENSG00000085978.22	ATG16L1	23.19	15.38	21.59	10.51	8.88	10.48
	ENSG00000088826.18	SMOX	16.25	15.91	19.6	5.91	7.71	11.64
	ENSG00000089048.14	ESF1	3.84	5.38	2.27	1.93	1.73	2.13
	ENSG00000092758.17	COL9A3	14.27	20.21	22.48	6.78	9.84	7.1
	ENSG00000099260.11	PALMD	2.22	2.18	2.02	1.01	0.9	0.51
	ENSG00000099998.17	GGT5	6.77	6.84	4.64	2.54	1.84	2.06
	ENSG00000101204.17	CHRNA4	1.12	1.28	1.95	0.05	0.09	0.22
	ENSG00000101871.14	MID1	4.81	4.09	2.08	1.5	1.36	1.64
	ENSG00000102096.9	PIM2	23.9	24.31	32.51	8.84	11.43	10.96
	ENSG00000102189.16	EEA1	2.14	2.12	1.38	0.81	0.78	0.74
	ENSG00000102271.14	KLHL4	3.05	3.32	3.64	0	0.02	0
	ENSG00000103175.11	WFDC1	30.25	32.57	38.55	0.81	0.88	0.9
	ENSG00000103241.7	FOXF1	0.95	0.83	0.72	0.21	0.22	0.1
	ENSG00000104140.7	RHOV	31.68	41.24	52.66	7.71	9.51	6.08
	ENSG00000104369.5	JPH1	10.21	7.36	7.42	3.84	3.07	5.13
	ENSG00000104953.20	TLE6	3.41	3.65	5.89	1.3	3.53	2.58
	ENSG00000106018.14	VIPR2	13.53	13.56	16.18	4.86	5.57	4.97
	ENSG00000107242.18	PIP5K1B	4.48	3.89	4.01	2.18	1.88	2.3
	ENSG00000108821.13	COL1A1	11.77	14.8	16.57	4.98	6.35	4.62
	ENSG00000110042.8	DTX4	14.69	13.31	13.62	7.58	6.94	7.17
	ENSG00000110693.17	SOX6	0.45	0.35	0.26	0.01	0.01	0
	ENSG00000111432.4	FZD10	1.01	0.82	1.91	0.03	0.02	0
	ENSG00000111885.7	MAN1A1	3.54	3.09	2.48	1.29	1.04	1.41
	ENSG00000112394.17	SLC16A10	0.3	1.19	0.38	0.21	0.13	0.39
	ENSG00000113083.14	LOX	16.98	12.9	18.82	3.78	5.85	5.6
	ENSG00000113389.16	NPR3	0.46	0.38	0.23	0.04	0.1	0.05
	ENSG00000114541.15	FRMD4B	1.64	0.52	1.64	0.31	0.31	0.23
	ENSG00000115271.11	GCA	3.38	3.93	2.96	0.52	0.63	0.39
	ENSG00000115414.19	FN1	2.39	1.96	1.49	0.56	0.7	0.13
	ENSG00000115425.14	PECR	8.75	9.55	10.15	5.99	3.92	4.24
	ENSG00000115540.15	MOB4	16.8	19.09	15.72	6.8	8.71	8.99
	ENSG00000115596.4	WNT6	6.04	8.71	9.55	2.31	2.83	2.88
	ENSG00000115919.15	KYNU	119.68	107.39	109.97	38.54	32.85	45.93
	ENSG00000115935.17	WIPF1	23.18	22.05	29.91	7.14	7.33	5.98
	ENSG00000115963.13	RND3	12.19	10.41	8.5	7.08	3.47	6.26
	ENSG00000116016.14	EPAS1	10.53	10.33	9.1	2.5	1.29	1.44
	ENSG00000116141.15	MARK1	1.92	3.45	1.49	0.76	0.7	1.12
	ENSG00000116667.14	C1orf21	0.9	0.79	0.34	0.19	0.13	0.14
	ENSG00000116685.16	KIAA2013	40.91	42.03	49.48	22.33	23.79	23.3
	ENSG00000116690.12	PRG4	0.37	0.46	0.32	0.13	0.23	0.17
	ENSG00000118194.19	TNNT2	1.89	4.2	3.93	0.57	0.41	0.72
	ENSG00000118242.16	MREG	4.8	4.27	4.81	2.4	2.43	2.17
	ENSG00000118257.16	NRP2	11.3	9.09	11.76	3.86	3.89	4.08
	ENSG00000118777.12	ABCG2	22.74	24.75	25.37	10.15	9.28	8.56
	ENSG00000118922.17	KLF12	1.4	0.78	0.82	0.13	0.13	0.07
	ENSG00000118997.14	DNAH7	0.78	0.49	0.36	0.24	0.06	0.28
	ENSG00000119138.4	KLF9	1.67	1.35	1.26	0.17	0.2	0.18
	ENSG00000119508.18	NR4A3	2.68	2.15	2.38	1.26	1.19	1.17
	ENSG00000120162.10	MOB3B	5.05	4.12	3.26	0.62	0.49	0.58
	ENSG00000120899.18	PTK2B	5.49	5.63	4.6	1.55	3.26	2.61
	ENSG00000121858.11	TNFSF10	1.74	1.25	2.83	0.49	0.47	0.69
	ENSG00000123607.15	TTC21B	7.4	6.74	8.59	3.22	3.46	3.33
	ENSG00000123700.4	KCNJ2	0.11	0.08	0.14	0	0.02	0.04
	ENSG00000123838.11	C4BPA	2.53	2.3	2.45	0.28	0.31	0.6
	ENSG00000123999.5	INHA	3.14	4.35	3.95	1.28	1.09	2.15
	ENSG00000124831.19	LRRFIP1	50.95	43.12	46.5	19.26	21.66	18.56
	ENSG00000124839.13	RAB17	14.93	19.64	19	9.61	11.82	9.99
	ENSG00000125845.7	BMP2	32.87	29.29	29.18	11.3	10.67	11.51
	ENSG00000125968.9	ID1	152.78	160.54	243.96	78.15	89.5	83.43
	ENSG00000126803.9	HSPA2	1.42	1.16	0.88	0.43	0.46	0.41
	ENSG00000127578.7	WFIKKN1	0.37	0.39	0.78	0.06	0.06	0
	ENSG00000127824.14	TUBA4A	267.25	209	201.84	128.74	90.68	119.7
	ENSG00000127838.14	PNKD	73.69	92.04	150.21	42.87	55.89	44.53
	ENSG00000127914.16	AKAP9	4.25	4.75	3.08	2.59	2.34	3.17
	ENSG00000127954.12	STEAP4	79.74	62.26	50.25	26.22	21.84	29.63
	ENSG00000128683.14	GAD1	5.95	6.72	7.4	3.31	3.32	3.8
	ENSG00000128708.13	HAT1	69.65	65.63	55.12	33.24	29.87	36.98
	ENSG00000128709.13	HOXD9	5.43	8.21	7.4	3.09	4.4	3.2
	ENSG00000128710.5	HOXD10	1.05	0.73	0.32	0.04	0.23	0.23
	ENSG00000128713.13	HOXD11	2.45	2.46	2.35	0.24	0.71	0.19
	ENSG00000128714.6	HOXD13	0.88	0.74	1.38	0.04	0.14	0.1
	ENSG00000130600.18	H19	5575.57	4047.36	5813.5	2707.63	1959.33	2749.51
	ENSG00000131069.20	ACSS2	18.5	19.73	23.99	10.85	10.14	11.1
	ENSG00000131370.16	SH3BP5	32.22	28.17	32.92	18.54	14.89	14.46
	ENSG00000131746.13	TNS4	10.4	7.81	11.01	1.41	1.09	0.79
	ENSG00000132334.16	PTPRE	0.83	0.93	0.85	0.43	0.9	0.38
	ENSG00000132854.19	KANK4	0.47	0.18	0.45	0.15	0.12	0.03
	ENSG00000132906.18	CASP9	33.18	38.2	41.75	6.68	9.58	7.18
	ENSG00000133687.16	TMTC1	9.63	7.46	7.29	1.38	1.71	1.43
	ENSG00000134107.4	BHLHE40	52.93	48.61	51.58	23.14	19.52	20.81
	ENSG00000134533.6	RERG	4.94	4.56	5.08	1.95	2.29	2.94
	ENSG00000134755.16	DSC2	0.7	0.39	0.45	0.06	0.17	0.16
	ENSG00000134830.5	C5AR2	0.7	0.9	0.7	0.11	0.05	0.13
	ENSG00000135111.16	TBX3	21.16	20.85	20.44	10.9	10.31	9.89
	ENSG00000135114.12	OASL	23.94	29.28	31.9	13.62	16.05	12.32
	ENSG00000135525.18	MAP7	27.92	21.93	23.88	5.74	5.3	6.06
	ENSG00000135678.12	CPM	19.13	18.09	16.08	2.25	3.04	3.14
	ENSG00000135924.15	DNAJB2	19.59	18.13	22.59	9.29	12.62	9.77
	ENSG00000135960.10	EDAR	0.11	0.26	0.2	0.01	0.03	0.03
	ENSG00000136158.12	SPRY2	8.05	8.74	9.67	4.23	4.39	4.89
	ENSG00000137496.17	IL18BP	1.35	1.76	1.54	0.69	0.89	1.12
	ENSG00000138182.14	KIF20B	9.53	8.49	4.86	4.66	2.28	4.47
	ENSG00000138413.13	IDH1	148.99	129.74	121.69	55.15	49.15	58.43
	ENSG00000138696.10	BMPR1B	0.18	0.14	0.35	0.02	0.04	0.01
	ENSG00000138735.16	PDE5A	2.1	2.1	1.23	1.97	1.43	0.95
	ENSG00000138778.11	CENPE	2.09	3.05	1.17	1.02	0.32	0.89
	ENSG00000138944.8	SHISAL1	4.64	4.1	4.44	2.08	1.99	1.66
	ENSG00000139304.8	PTPRQ	2.87	3.36	1.4	0.78	1.15	1.14
	ENSG00000139832.5	RAB20	34.89	45.91	49.9	10.57	14.86	12.46
	ENSG00000140092.14	FBLN5	16.17	13.27	12.13	6.22	4.96	6.64
	ENSG00000140795.13	MYLK3	1.62	1.08	1.29	0.45	1.01	0.94
	ENSG00000141338.14	ABCA8	1.68	0.89	0.86	0.3	0.19	0.84
	ENSG00000141639.12	MAPK4	0.93	0.37	0.74	0.03	0.01	0.02
	ENSG00000141750.7	STAC2	3.26	4.81	4.54	0.33	0.37	0.38
	ENSG00000142089.16	IFITM3	1052.82	1109.57	1459.46	559.03	562.05	580.37
	ENSG00000142182.8	DNMT3L	1.43	1.48	1.82	0.31	0.09	0.12
	ENSG00000142634.13	EFHD2	68.14	85.15	102.54	26.05	30.55	25.36
	ENSG00000143013.13	LMO4	17.49	12.78	12.93	5.02	5.51	6.99
	ENSG00000143382.14	ADAMTSL4	20.14	23.66	26.37	8.74	10.47	8.98
	ENSG00000144426.18	NBEAL1	4.78	6.08	5.05	1.76	5.08	1.27
	ENSG00000144460.12	NYAP2	5.31	4.75	4.63	2.26	1.62	1.83
	ENSG00000144476.6	ACKR3	45.76	33.53	36.7	13.31	13.21	16.57
	ENSG00000144674.16	GOLGA4	5.65	7.83	3.79	2.85	2.53	3.3
	ENSG00000144824.20	PHLDB2	23.86	21.39	18.38	11.38	10.75	11.93
	ENSG00000145349.17	CAMK2D	0.67	0.71	0.56	0.15	0.14	0.14
	ENSG00000145687.16	SSBP2	7.52	8.26	9.48	3.53	4.83	4.51
	ENSG00000146205.13	ANO7	3.51	2.93	3.18	1.33	1.67	2.16
	ENSG00000146859.6	TMEM140	2.74	2.31	4.32	0.71	0.62	1.91
	ENSG00000147206.17	NXF3	0.39	0.34	0.44	0.02	0.06	0.2
	ENSG00000149380.12	P4HA3	1.74	1.84	3.37	1	0.65	0.65
	ENSG00000150630.4	VEGFC	1.35	1.14	0.96	0.65	0.45	0.34
	ENSG00000150687.12	PRSS23	51.67	56.83	45.25	24.27	25.94	28
	ENSG00000151726.14	ACSL1	7.26	5.94	5.94	2.88	3.35	3.24
	ENSG00000152256.13	PDK1	21.61	15.82	15.81	9.56	8.88	9.72
	ENSG00000152952.12	PLOD2	54.13	45.16	39.98	21.99	19.48	24.71
	ENSG00000153162.9	BMP6	9.73	9.2	10.58	4.43	5	4.04
	ENSG00000153234.14	NR4A2	7.76	4.22	4.74	1.68	1.48	1.54
	ENSG00000153832.12	FBXO36	0.85	0.6	1.36	0.32	0.27	0.33
	ENSG00000154065.17	ANKRD29	5.62	6.74	6	2.01	2.94	2.79
	ENSG00000154518.9	ATP5MC3	254.76	340.16	397.68	140.36	216.25	151.29
	ENSG00000154556.18	SORBS2	5.21	3.04	4.39	0.74	0.14	0.3
	ENSG00000154736.6	ADAMTS5	0.62	0.7	0.53	0.25	0.26	0.4
	ENSG00000156869.13	FRRS1	1.29	1.84	1.58	0.52	0.94	1.02
	ENSG00000157445.15	CACNA2D3	2.48	2.73	2.55	1.2	1.44	1.87
	ENSG00000158104.11	HPD	140.68	144.79	179.53	49.17	54.31	49.79
	ENSG00000160191.18	PDE9A	6.62	5.72	5.75	1.47	0.84	0.72
	ENSG00000160223.17	ICOSLG	3.04	3.48	2.52	1.07	1	0.7
	ENSG00000160867.15	FGFR4	11.64	15.61	17.01	7.62	9.14	7.15
	ENSG00000161091.13	MFSD12	293.29	320.25	398.4	163.69	178.71	162.06
	ENSG00000162804.14	SNED1	2.23	1.99	1.66	0.69	1.1	0.34
	ENSG00000163251.4	FZD5	2.43	2.58	2.33	1.2	1.34	1.26
	ENSG00000163286.9	ALPG	11.47	11.96	14.18	4.04	3.83	3.48
	ENSG00000163295.5	ALPI	430.28	412.72	540.83	3.6	4.62	2.65
	ENSG00000163328.13	GPR155	1.15	1.1	0.24	0.05	0.17	0.04
	ENSG00000163453.11	IGFBP7	55.62	57.95	70.17	25.64	28.81	24.33
	ENSG00000163536.12	SERPINI1	6.01	5.94	6.51	1.19	0.22	0.67
	ENSG00000163590.14	PPM1L	1.15	1.16	1.39	0.24	0.25	0.2
	ENSG00000163874.11	ZC3H12A	8.65	9.56	13.1	5.28	6.59	4.11
	ENSG00000163993.7	S100P	209.76	326.75	587.82	110.84	181.17	120.74
	ENSG00000164056.11	SPRY1	0.47	1.09	1.45	0.24	0.32	0.24
	ENSG00000165072.10	MAMDC2	1.15	1.14	1.1	0.01	0.02	0
	ENSG00000165449.11	SLC16A9	0.9	0.8	0.49	0.17	0.09	0.18
	ENSG00000165929.13	TC2N	4.26	4.3	5.27	1.07	1	0.71
	ENSG00000165995.20	CACNB2	2.93	2.44	2.18	0.25	0.27	0.47
	ENSG00000166741.7	NNMT	205.11	226.99	281.08	100.22	102.49	100.05
	ENSG00000167107.12	ACSF2	19.84	21.74	25.42	10.53	10.41	10.83
	ENSG00000167508.12	MVD	71.7	48.81	91.83	19.93	38.91	23.8
	ENSG00000167656.5	LY6D	5.86	8.1	12.15	3.47	4.1	3.29
	ENSG00000167701.14	GPT	0.84	1	2.93	0.18	0.46	0.43
	ENSG00000168610.14	STAT3	69.04	63.63	60.13	10.9	14.07	12.35
	ENSG00000168672.4	FAM84B	5.8	5.3	4.19	1.79	1.4	2.1
	ENSG00000169093.16	ASMTL	25.92	30.93	32.92	13.74	15.29	13.43
	ENSG00000169239.13	CA5B	18.83	18	21.47	9.76	6.39	8.49
	ENSG00000169418.10	NPR1	31.21	35.34	37.59	15.69	18.66	16.33
	ENSG00000169554.20	ZEB2	2.28	1.83	1.64	0.33	0.36	0.31
	ENSG00000169918.9	OTUD7A	1.25	1.52	1.25	0.39	1	0.51
	ENSG00000170153.11	RNF150	3.95	2.37	3.46	1.02	0.57	0.59
	ENSG00000170190.16	SLC16A5	8.37	9.45	10.76	5.27	4.14	6.01
	ENSG00000170537.13	TMC7	2.36	1.97	2.6	1.06	0.9	1.26
	ENSG00000170558.9	CDH2	0.89	0.69	0.72	0.61	0.94	0.48
	ENSG00000170775.2	GPR37	5.29	4.14	5.88	1.5	1.15	0.81
	ENSG00000171246.6	NPTX1	48.47	48.45	54.85	19.5	21.56	18.2
	ENSG00000171916.16	LGALS9C	1.86	0.67	0.73	0.04	0.02	0.29
	ENSG00000172428.11	COPS9	193.11	241.51	393.06	86.53	138.32	117.19
	ENSG00000173744.17	AGFG1	39.36	31.83	35.21	22.87	18.73	21.01
	ENSG00000174473.16	GALNTL6	10.06	5.77	6.36	0.66	0.67	0.69
	ENSG00000174564.13	IL20RB	33.35	30.18	39.13	6.67	5.56	7.42
	ENSG00000174705.13	SH3PXD2B	3.21	3.08	3.13	1.47	1.79	1.13
	ENSG00000175544.13	CABP4	0.31	0.95	0.3	0.12	0.08	0.13
	ENSG00000175832.13	ETV4	6.15	6.24	6.75	3.58	3.97	3.01
	ENSG00000175920.18	DOK7	2.61	4.34	4.95	1.65	2.27	1.75
	ENSG00000176463.14	SLCO3A1	38.56	43.54	36.45	14.07	15.59	13.26
	ENSG00000176692.7	FOXC2	1.43	0.73	1.35	0.35	0.65	0.4
	ENSG00000176720.6	BOK	20.72	23.21	29.52	9	9.29	8.63
	ENSG00000176907.4	TCIM	8.62	10.28	9.84	4.45	5.18	5.02
	ENSG00000177674.16	AGTRAP	24.1	27.17	32.91	3.86	3.48	2.82
	ENSG00000177822.7	TENM3-AS1	0.87	0.34	0.45	0.25	0.22	0
	ENSG00000179085.7	DPM3	185.96	240.93	485.91	118.11	128.62	132.32
	ENSG00000180044.5	C3orf80	2.54	2.67	3.48	1.1	1.46	1.23
	ENSG00000181418.8	DDN	0.71	0.98	0.68	0.04	0.04	0.02
	ENSG00000181885.18	CLDN7	48.14	50.16	77.16	25.38	30.04	29.29
	ENSG00000182621.18	PLCB1	1.91	1.47	1.15	0.94	0.67	1.46
	ENSG00000182752.10	PAPPA	0.58	0.5	0.47	0.02	0.01	0.02
	ENSG00000183508.5	TENT5C	0.55	0.41	0.29	0.07	0.06	0.03
	ENSG00000183691.4	NOG	5.79	6.81	8.15	1.61	1.88	1.2
	ENSG00000184185.10	KCNJ12	1.09	0.96	1.8	0.49	0.45	0.87
	ENSG00000184557.4	SOCS3	5.63	6.61	7.53	3.21	2.67	2.43
	ENSG00000184613.10	NELL2	0.93	0.47	0.97	0.05	0.13	0.36
	ENSG00000185008.17	ROBO2	0.24	0.33	0.43	0.22	0.04	0.05
	ENSG00000185186.9	LINC00313	15.3	13.99	19.35	5.82	5.17	3.22
	ENSG00000185499.16	MUC1	106.17	109.92	103.68	24.13	25.13	22.56
	ENSG00000185518.11	SV2B	0.89	0.57	0.7	0.07	0.07	0.08
	ENSG00000185633.10	NDUFA4L2	4.16	2.75	6.16	0.37	0.55	0.55
	ENSG00000185838.14	GNB1L	6.82	11.82	15.09	5.17	5.94	4.64
	ENSG00000185885.16	IFITM1	245.92	349.18	428.49	118.31	187.8	136.56
	ENSG00000187134.14	AKR1C1	31.08	24.07	26.8	1.02	1.36	1.63
	ENSG00000187634.12	SAMD11	9.43	10.27	14.73	1.18	2.38	1.25
	ENSG00000187775.16	DNAH17	0.73	0.81	0.59	0.33	0.31	0.96
	ENSG00000188153.13	COL4A5	22.99	19.61	17.85	12.32	9.47	12.48
	ENSG00000188505.5	NCCRP1	2.97	2.47	2.54	0.95	1.59	1.01
	ENSG00000196083.10	IL1RAP	8.24	6.3	5.74	3.4	5.65	3.36
	ENSG00000196730.13	DAPK1	6.71	8.92	7.45	3	3.2	3.24
	ENSG00000196950.14	SLC39A10	25.34	20.27	16.46	10.11	10.58	12.23
	ENSG00000197121.15	PGAP1	1.01	1.2	1.37	0.31	0.5	0.38
	ENSG00000197442.10	MAP3K5	2.64	2.16	2.01	0.91	1.01	0.93
	ENSG00000197756.9	RPL37A	2113.81	3424.26	3812.23	1334.98	2031.39	1406.77
	ENSG00000197943.10	PLCG2	0.77	1.06	0.82	0.59	0.78	0.31
	ENSG00000198707.15	CEP290	1.77	2.14	1.22	2.34	1.59	2.16
	ENSG00000198796.7	ALPK2	1.29	1.24	0.75	0.04	0.08	0.22
	ENSG00000198835.4	GJC2	0.6	1.66	2.28	0.44	0.42	0.62
	ENSG00000198843.13	SELENOT	54.97	36.06	40.76	15.39	13.05	17.39
	ENSG00000198947.15	DMD	23.69	22.85	19.61	10.36	8.92	10.11
	ENSG00000198959.12	TGM2	35.36	38.82	44.34	14.66	16.22	14.87
	ENSG00000203722.8	RAET1G	6.19	6.33	8.07	2.69	2.25	3.06
	ENSG00000204103.4	MAFB	0.4	0.51	0.74	0.07	0.19	0.13
	ENSG00000204174.7	NPY4R	7.22	7.51	8.05	2.06	2.23	1.79
	ENSG00000204262.13	COL5A2	27.77	28.27	31.13	3.56	3.42	4.37
	ENSG00000204291.11	COL15A1	3.55	2.56	2.92	0.27	0.18	0.25
	ENSG00000204406.13	MBD5	3.69	2.56	3.48	1.72	3.1	1.59
	ENSG00000213949.9	ITGA1	9.72	6.14	8.02	4.17	3.88	4.94
	ENSG00000215845.11	TSTD1	28.8	26.6	48.42	7.19	7.22	7.46
	ENSG00000215910.7	C1orf167	0.61	0.9	1.51	0.09	0.26	0.09
	ENSG00000218226.1	TATDN2P2	1.14	1.55	1.41	0.81	0.62	0.51
	ENSG00000218336.9	TENM3	1.05	0.65	1.19	0.01	0.1	0.24
	ENSG00000221944.7	TIGD1	6.13	5.63	4.84	2.78	2.16	3.33
	ENSG00000221995.5	TIAF1	1.15	1.05	0.89	0.45	0.38	0.37
	ENSG00000222033.1	LINC01124	0.55	0.47	0.71	0.12	0.08	0.21
	ENSG00000224389.9	C4B	0.54	0.35	0.51	0.28	0.55	0.18
	ENSG00000225697.13	SLC26A6	21.03	25	33.33	11.87	13.27	13.11
	ENSG00000226416.1	MRPL23-AS1	2.2	2.87	3.13	1.62	2.12	0.52
	ENSG00000227764.1	LINC01693	3.8	3.53	7.93	1.89	2.6	1.84
	ENSG00000231925.11	TAPBP	4.6	5.68	14.51	2.46	4.55	3.01
	ENSG00000232010.1	AP001059.1	1.22	4.35	5.25	0.15	0.58	1.11
	ENSG00000233611.3	AC019068.1	8.19	5.67	10.01	1.46	0.89	0.94
	ENSG00000236933.1	RP11-439A17.7	2.83	3.33	4.56	1.54	0.82	0.39
	ENSG00000237298.9	TTN-AS1	8.19	5.83	5.95	4.66	3.18	4.22
	ENSG00000237412.6	PRSS56	2.58	4.05	6.41	0.53	0.45	0.24
	ENSG00000238045.9	AC009133.1	1.22	2.12	5.38	0.76	1.43	0.98
	ENSG00000243988.1	RPS24P17	32.29	27.04	17.66	0	0.87	0
	ENSG00000244257.5	PKD1P1	5.19	8.06	7.05	3.28	5.17	2.59
	ENSG00000244405.8	ETV5	3.78	5.09	6.26	2.74	2.37	1.51
	ENSG00000244509.4	APOBEC3C	25.02	19.9	17.96	9.26	10.11	10.32
	ENSG00000244731.8	C4A	0.52	0.63	0.75	0.44	0.43	0.23
	ENSG00000246228.6	CASC8	19.41	13.18	22.87	6.57	8.62	9.22
	ENSG00000248323.6	LUCAT1	4.9	5.56	4.91	1.9	1.91	1.41
	ENSG00000249628.2	LINC00942	0.32	0.22	0.3	0.04	0.05	0
	ENSG00000250208.6	FZD10-AS1	1.98	1.32	2.66	0	0.01	0
	ENSG00000250722.6	SELENOP	11.56	7.76	13.13	1.6	1.44	2.89
	ENSG00000251095.6	AC097478.1	1.97	1.83	2.03	0.68	0.37	0.99
	ENSG00000255339.6	AL133352.1	1.75	1.8	1.99	0.32	0.24	0
	ENSG00000259112.2	NDUFC2-KCTD14	3.86	4.21	13.48	3.01	1.11	1.93
	ENSG00000259529.2	AL136295.5	0.78	1.31	0.8	0.41	0.49	0.19
	ENSG00000260260.1	SNHG19	94.21	195.41	511.34	70.7	116.22	73.92
	ENSG00000260896.6	ARLNC1	1.71	2.67	0.88	0.34	0.36	1.18
	ENSG00000261423.1	TMEM202-AS1	1.71	2.36	6.42	0.99	2.08	1.44
	ENSG00000264717.5	NPY4R2	8.04	3.46	6.56	0.08	0.05	0.09
	ENSG00000267432.5	DNAH17-AS1	5.35	5.37	5.24	2.46	1.53	2.15
	ENSG00000267909.3	CCDC177	0.38	0.34	0.77	0.17	0.19	0.23
	ENSG00000269113.4	TRABD2B	0.72	1.03	0.88	0.34	0.78	0.42
	ENSG00000273301.1	AC016717.2	9.78	9.15	6.4	2.49	2.75	2.89
	ENSG00000277117.4	FP565260.3	5.82	3.29	4.82	0.84	1.39	1.67
	ENSG00000279400.1	AC008957.3	0.75	0.94	0.43	0.35	0.2	0.11
	ENSG00000279806.1	AC018629.1	0.7	0.31	0.59	0.13	0.1	0.11
	ENSG00000280081.4	LINC01667	1.21	1.59	1.82	0.23	0.04	0.1
	ENSG00000280213.1	UCKL1-AS1	0.7	1.08	0.91	0.28	0.33	0.3
	ENSG00000280217.1	AC126564.1	3	2.54	3.01	1.17	1.26	1.12
	ENSG00000280287.1	AC131212.3	1.03	1.15	1.52	0.33	0.18	0.23
	ENSG00000283703.2	VSIG10L2	2.2	0.94	1.94	0.56	0.27	0
	ENSG00000284820.1	AC068946.2	0.79	0.46	1.12	0.19	0.37	0.28
	ENSG00000285641.1	AL358472.6	3.25	5.56	10.64	1.52	3.53	1.44
	ENSG00000286193.1	AC025449.2	17.86	20.06	33.31	5.43	6.78	8.26
	novel.10593	novel.10593	1.51	2.04	2.32	0.96	0.7	0.41
	novel.11572	novel.11572	0.57	1.28	1.38	0.31	0.28	0.07
	novel.14507	novel.14507	1.72	1.8	1.9	0.69	0.61	0.82
	novel.15350	novel.15350	3.24	3.94	3.64	1.95	1.69	1.49
	novel.21789	novel.21789	1.88	1.76	2.15	0.77	0.49	0.88
	novel.22990	novel.22990	1.69	1.6	1.4	0.23	0.35	0.29
	novel.23399	novel.23399	2.3	27.45	15.33	0	2.91	3.59
	novel.24086	novel.24086	0.65	2.35	2.39	0.37	0.43	0.32
	novel.25692	novel.25692	7.86	7.63	7.09	1.9	1.9	2.27
	novel.27013	novel.27013	0.63	0.22	1.42	0.09	0.11	0.38
	novel.5400	novel.5400	1.24	1.51	2.04	1.09	0.45	0.53
	ENSG00000018236.15	CNTN1	0.4	0.54	0.82	0	0	0
	ENSG00000049192.15	ADAMTS6	0.39	0.23	0.33	0	0	0.02
	ENSG00000078098.14	FAP	0.34	0.24	0.46	0	0	0
	ENSG00000100078.4	PLA2G3	1.08	0.82	1.42	0.07	0	0.02
	ENSG00000105141.6	CASP14	0.28	0.2	0.26	0	0	0
	ENSG00000105695.15	MAG	0.81	0.25	1.72	0.02	0	0.24
	ENSG00000127533.3	F2RL3	0.3	0.27	0.31	0.1	0	0.04
	ENSG00000144285.19	SCN1A	0.07	0.19	0.06	0	0	0
	ENSG00000144596.13	GRIP2	0.22	0.56	0.24	0	0	0.02
	ENSG00000146166.16	LGSN	0.2	0.12	0.05	0	0	0
	ENSG00000153707.17	PTPRD	0.13	0.07	0.04	0	0	0
	ENSG00000153823.18	PID1	0.79	0.46	0.52	0.13	0	0.2
	ENSG00000163673.7	DCLK3	0.35	0.29	0.37	0	0	0
	ENSG00000164128.7	NPY1R	0.32	0.55	0.12	0	0	0
	ENSG00000171408.14	PDE7B	0.58	0.31	0.35	0.02	0	0.02
	ENSG00000172379.21	ARNT2	0.15	0.04	0.24	0.03	0	0
	ENSG00000178397.13	FAM220A	0.27	13.11	5.67	0	0	0
	ENSG00000204442.3	FAM155A	0.07	0.07	0.07	0	0	0
	ENSG00000205221.12	VIT	4.1	2.58	3.56	0	0	0
	ENSG00000211689.7	TRGC1	0.21	0.15	0.24	0	0	0
	ENSG00000225807.1	AC069281.1	0.52	0.76	1.12	0	0	0
	ENSG00000235123.5	DSCAM-AS1	0.49	0.64	0.34	0	0	0
	ENSG00000241978.9	AKAP2	0.36	0.25	0.1	0.03	0	0.17
	ENSG00000242515.5	UGT1A10	0.22	0.23	0.29	0	0	0
	ENSG00000253102.1	AC004707.1	0.65	0.79	1.96	0.21	0	0
	ENSG00000258529.5	AP001781.2	0.16	0.84	0.4	0	0	0.18
	ENSG00000260139.6	CSPG4P13	0.16	0.14	0.54	0.02	0	0.01
	ENSG00000261641.2	AL031600.3	0.23	0.41	1.35	0	0	0
	ENSG00000279493.1	FP565260.4	6.22	3.01	1.98	0	0	0
	ENSG00000286221.1	AC009070.1	0.44	0.25	0.86	0	0	0
	novel.14517	novel.14517	0.24	4.94	1.84	0	0	0
	novel.15947	novel.15947	2.87	0.6	2.49	0	0	0
	novel.17049	novel.17049	0.69	0.51	0.46	0	0	0
	novel.20313	novel.20313	6.44	2.26	5.7	0.13	0	0
	novel.23419	novel.23419	2.51	15.93	159.38	0	0	0
	ENSG00000261093.1	AC141586.3	0	0	2.84	0	0	0

## Sheet: Figure 4B
Figure 4
B	GeneID	GeneName	control-Expression	treat-Expression	log2FoldChange	pvalue	padj
	ENSG00000070915.9	SLC12A3	7314.94	37.1599	-7.62096	0	0
	ENSG00000163295.5	ALPI	23459.5	164.103	-7.15943	0	0
	ENSG00000113657.13	DPYSL3	50.4822	3104.15	5.94228	4.71064e-279	2.78195e-275
	ENSG00000101680.15	LAMA1	569.05	6263.57	3.46036	5.21352e-214	2.3092e-210
	ENSG00000068985.5	PAGE1	62.5312	2197.79	5.13533	4.79821e-213	1.7002e-209
	ENSG00000168610.14	STAT3	4985.84	700.275	-2.83185	1.05187e-190	3.10599e-187
	ENSG00000204262.13	COL5A2	2114.29	295.048	-2.84115	3.04564e-143	7.70852e-140
	ENSG00000170477.13	KRT4	24.5216	1013.81	5.36959	5.35255e-127	1.18539e-123
	ENSG00000103175.11	WFDC1	783.387	19.0096	-5.36492	1.75791e-106	3.46054e-103
	ENSG00000135678.12	CPM	981.05	86.85	-3.49773	1.67064e-101	2.95987e-98
	ENSG00000185499.16	MUC1	3463.74	744.866	-2.21728	4.19504e-93	6.75668e-90
	ENSG00000116016.14	EPAS1	927.843	128.927	-2.84733	6.44547e-84	9.51619e-81
	ENSG00000106991.13	ENG	24.5117	529.569	4.43328	1.49825e-77	2.04189e-74
	ENSG00000135525.18	MAP7	1630.34	341.898	-2.25353	3.75625e-74	4.75354e-71
	ENSG00000187134.14	AKR1C1	540.686	27.5583	-4.29423	4.67169e-72	5.51789e-69
	ENSG00000198513.11	ATL1	91.5923	722.842	2.98038	2.72142e-71	3.01346e-68
	ENSG00000128591.15	FLNC	107.966	960.093	3.1526	1.51566e-68	1.57959e-65
	ENSG00000079308.19	TNS1	1319.59	222.735	-2.56669	3.86286e-68	3.80213e-65
	ENSG00000125740.14	FOSB	324.898	1654.95	2.34873	4.18702e-67	3.90428e-64
	ENSG00000131746.13	TNS4	609.017	50.7077	-3.5862	8.74869e-66	7.75003e-63
	ENSG00000179869.15	ABCA13	99.1319	679.011	2.77601	1.75975e-63	1.48464e-60
	novel.27033	novel.27033	11.9232	457.507	5.26195	9.72839e-62	7.83445e-59
	ENSG00000163347.6	CLDN1	620.486	2314.84	1.89944	3.34277e-58	2.57495e-55
	ENSG00000133687.16	TMTC1	939.538	160.927	-2.54555	1.09797e-53	8.05013e-51
	ENSG00000174564.13	IL20RB	1183.47	205.951	-2.52265	1.13593e-53	8.05013e-51
	ENSG00000008517.16	IL32	191.747	1207	2.65415	1.08932e-52	7.42291e-50
	novel.13255	novel.13255	66.2466	467.788	2.81994	7.32983e-51	4.80973e-48
	ENSG00000204174.7	NPY4R	1519.48	359.057	-2.08129	1.99361e-50	1.26146e-47
	ENSG00000266714.9	MYO15B	14.4724	324	4.48462	2.29096e-49	1.39962e-46
	ENSG00000143320.9	CRABP2	196.566	861.894	2.1325	8.50606e-49	5.0234e-46
	ENSG00000180537.13	RNF182	194.831	891.152	2.19345	7.51169e-48	4.29305e-45
	ENSG00000176463.14	SLCO3A1	2046.63	679.759	-1.59016	4.16788e-47	2.30757e-44
	ENSG00000177674.16	AGTRAP	469.14	55.011	-3.09223	5.10416e-46	2.74031e-43
	ENSG00000125845.7	BMP2	2087.38	718.387	-1.53886	1.58426e-45	8.25541e-43
	ENSG00000198843.13	SELENOT	1569.28	503.022	-1.64141	4.0349e-45	2.04247e-42
	ENSG00000120162.10	MOB3B	508.132	67.2841	-2.91687	4.70938e-45	2.31767e-42
	ENSG00000133216.16	EPHB2	36.5683	356.625	3.28574	1.02323e-44	4.8996e-42
	ENSG00000132906.18	CASP9	979.112	204.613	-2.25858	2.19388e-44	1.02287e-41
	ENSG00000133710.15	SPINK5	1190.85	3719.92	1.64329	2.65878e-44	1.20783e-41
	ENSG00000115919.15	KYNU	2876.23	977.21	-1.55744	9.25623e-44	4.09982e-41
	ENSG00000119771.15	KLHL29	224.248	790.947	1.81849	2.93722e-41	1.26924e-38
	ENSG00000068078.18	FGFR3	790.065	157.735	-2.32447	1.47764e-40	6.23319e-38
	ENSG00000138604.10	GLCE	369.124	1472.1	1.99569	3.48165e-40	1.43452e-37
	ENSG00000198959.12	TGM2	2807.49	1027.66	-1.44992	4.95839e-40	1.99654e-37
	novel.25692	novel.25692	1003.35	255.526	-1.97329	1.18833e-39	4.6786e-37
	ENSG00000073756.12	PTGS2	172.155	905.843	2.39555	1.4976e-39	5.76806e-37
	ENSG00000086205.18	FOLH1	3.61796	329.203	6.50766	2.06118e-39	7.60791e-37
	ENSG00000121753.12	ADGRB2	167.142	719.498	2.10592	2.02773e-39	7.60791e-37
	ENSG00000158104.11	HPD	3658.94	1142.04	-1.67982	8.79076e-39	3.17849e-36
	ENSG00000138193.15	PLCE1	142.965	614.195	2.10304	3.59289e-38	1.2731e-35
	ENSG00000023171.18	GRAMD1B	840.526	168.018	-2.32268	5.14592e-38	1.78765e-35
	ENSG00000162366.8	PDZK1IP1	66.0925	382.389	2.53248	1.70357e-37	5.80425e-35
	ENSG00000171246.6	NPTX1	5287.84	1904.91	-1.47295	2.28828e-37	7.64934e-35
	ENSG00000170689.10	HOXB9	139.292	587.916	2.07749	5.14334e-37	1.68749e-34
	ENSG00000150687.12	PRSS23	2794.67	1098.07	-1.34771	9.07933e-37	2.9247e-34
	ENSG00000204291.11	COL15A1	274.005	22.4204	-3.61132	1.10651e-36	3.50071e-34
	ENSG00000134107.4	BHLHE40	3036.64	1168.85	-1.37739	1.74932e-36	5.43731e-34
	ENSG00000124831.19	LRRFIP1	2517.23	1019.52	-1.30394	5.81789e-36	1.77717e-33
	ENSG00000090530.10	P3H2	279.989	942.499	1.75112	2.05806e-35	6.18011e-33
	ENSG00000138413.13	IDH1	5526.69	2137.02	-1.37082	4.50887e-34	1.3314e-31
	ENSG00000215182.6	MUC5AC	67.4038	384.038	2.51035	1.09555e-32	3.18195e-30
	ENSG00000166741.7	NNMT	3594.74	1573.81	-1.19162	1.39851e-32	3.99635e-30
	ENSG00000103811.16	CTSH	53.4702	353.114	2.72333	5.12085e-32	1.4401e-29
	ENSG00000163286.9	ALPG	622.616	175.786	-1.82453	8.56214e-32	2.37024e-29
	ENSG00000104140.7	RHOV	1189.5	208.661	-2.51112	9.15876e-32	2.4964e-29
	ENSG00000174473.16	GALNTL6	270.439	22.8977	-3.56203	1.04651e-31	2.80925e-29
	ENSG00000118777.12	ABCG2	1225.12	456.893	-1.42299	1.3407e-30	3.54524e-28
	ENSG00000148346.12	LCN2	52.3754	301.479	2.5251	2.59171e-30	6.75254e-28
	ENSG00000250722.6	SELENOP	326.79	48.1843	-2.76173	7.29465e-30	1.87303e-27
	ENSG00000106688.12	SLC1A1	305.268	862.251	1.49803	7.42799e-30	1.88002e-27
	ENSG00000105383.15	CD33	8.29959	173.122	4.3826	1.28702e-29	3.21156e-27
	ENSG00000181104.7	F2R	27.2149	246.454	3.17885	6.80865e-29	1.6754e-26
	ENSG00000170153.11	RNF150	531.617	114.015	-2.22117	1.21556e-28	2.95016e-26
	novel.27039	novel.27039	18.442	191.952	3.37968	1.66992e-28	3.99811e-26
	ENSG00000164089.9	ETNPPL	89.237	386.62	2.1152	6.47833e-28	1.53035e-25
	ENSG00000170509.12	HSD17B13	12.0363	197.047	4.03307	6.75174e-28	1.57395e-25
	ENSG00000107099.15	DOCK8	250.366	737.925	1.55944	1.17618e-27	2.70627e-25
	ENSG00000115935.17	WIPF1	981.967	325.505	-1.59299	1.56004e-27	3.54348e-25
	ENSG00000167996.16	FTH1	66678.8	136668	1.03537	1.58607e-27	3.557e-25
	ENSG00000143515.17	ATP8B2	59.6321	300.369	2.33257	1.91174e-27	4.23379e-25
	ENSG00000142634.13	EFHD2	3793.35	1136.42	-1.73898	3.01946e-27	6.60442e-25
	ENSG00000003436.16	TFPI	1186.36	346.245	-1.77667	7.31121e-27	1.57967e-24
	ENSG00000060982.15	BCAT1	157.886	3.6045	-5.45294	3.73446e-26	7.97149e-24
	ENSG00000165929.13	TC2N	260.919	42.5238	-2.61726	3.84404e-26	8.10773e-24
	ENSG00000135111.16	TBX3	1482.2	677.394	-1.12968	4.31553e-26	8.99509e-24
	novel.26264	novel.26264	7.63266	156.814	4.36072	1.36949e-25	2.82131e-23
	ENSG00000218336.9	TENM3	148.189	4.93118	-4.90936	1.49228e-25	3.03894e-23
	ENSG00000173926.6	2022-03-03	47.7549	271.252	2.50591	2.21139e-25	4.40216e-23
	ENSG00000188153.13	COL4A5	1568.05	739.671	-1.08401	2.35685e-25	4.63959e-23
	ENSG00000139832.5	RAB20	1109.23	303.887	-1.86795	4.03116e-25	7.84836e-23
	novel.26269	novel.26269	4.36654	160.41	5.19913	8.55049e-25	1.64662e-22
	ENSG00000142910.16	TINAGL1	827.949	2047.1	1.30596	1.06624e-24	2.03125e-22
	ENSG00000169891.18	REPS2	33.8392	255.047	2.914	1.25218e-24	2.3601e-22
	ENSG00000172346.15	CSDC2	38.1241	269.71	2.82263	1.38066e-24	2.57485e-22
	ENSG00000047644.18	WWC3	362.748	1063.47	1.55174	1.79423e-24	3.27715e-22
	ENSG00000091986.15	CCDC80	161.074	487.847	1.5987	2.1502e-24	3.88725e-22
	ENSG00000118922.17	KLF12	185.432	16.802	-3.46419	2.53823e-24	4.54241e-22
	ENSG00000177679.16	SRRM3	20.5457	187.762	3.192	3.23045e-24	5.72339e-22
	ENSG00000143382.14	ADAMTSL4	1407.66	484.206	-1.5396	3.56799e-24	6.25882e-22
	ENSG00000127824.14	TUBA4A	5698.18	2548.91	-1.16062	6.64816e-24	1.15476e-21
	ENSG00000102048.15	ASB9	119.021	397.473	1.73964	8.43821e-24	1.45145e-21
	ENSG00000108821.13	COL1A1	798.316	300.821	-1.40805	1.04041e-23	1.77239e-21
	ENSG00000166147.13	FBN1	1039.81	2600.15	1.32227	1.08277e-23	1.82699e-21
	ENSG00000273301.1	AC016717.2	841.748	252.332	-1.73807	1.36244e-23	2.2772e-21
	ENSG00000198626.16	RYR2	114.614	396.457	1.79038	1.95774e-23	3.21159e-21
	ENSG00000128791.12	TWSG1	499.595	1202.77	1.26753	2.26519e-23	3.61552e-21
	ENSG00000106829.18	TLE4	366.686	876.146	1.25663	3.23199e-23	5.1126e-21
	ENSG00000105255.11	FSD1	73.1587	362.44	2.30864	3.2615e-23	5.11362e-21
	ENSG00000221890.4	NPTXR	18.467	181.38	3.29599	3.66854e-23	5.70137e-21
	ENSG00000115414.19	FN1	226.284	23.7185	-3.25405	3.82813e-23	5.89764e-21
	ENSG00000163536.12	SERPINI1	149.835	12.4108	-3.5937	4.5588e-23	6.90328e-21
	ENSG00000264717.5	NPY4R2	190.683	1.80213	-6.72533	4.53008e-23	6.90328e-21
	ENSG00000163131.11	CTSS	11.5756	141.571	3.61236	5.42786e-23	8.14961e-21
	ENSG00000168398.6	BDKRB2	217.857	620.473	1.50999	7.39089e-23	1.10037e-20
	ENSG00000140092.14	FBLN5	571.998	215.526	-1.40815	8.32447e-23	1.22904e-20
	ENSG00000198947.15	DMD	1507.69	620.508	-1.28082	1.08336e-22	1.58627e-20
	ENSG00000130513.6	GDF15	285.198	901.443	1.66027	1.83003e-22	2.65759e-20
	ENSG00000144476.6	ACKR3	1054.77	371.998	-1.50356	1.97634e-22	2.84673e-20
	ENSG00000013619.14	MAMLD1	645.126	189.501	-1.76738	3.24431e-22	4.63543e-20
	ENSG00000198223.16	CSF2RA	435.928	1020.49	1.22711	3.47091e-22	4.91953e-20
	ENSG00000029153.14	ARNTL2	423.584	1063.34	1.32788	3.9456e-22	5.54796e-20
	ENSG00000071246.11	VASH1	23.6596	219.658	3.21476	4.92646e-22	6.8726e-20
	ENSG00000141750.7	STAC2	168.897	19.4791	-3.11615	6.11889e-22	8.4694e-20
	ENSG00000182752.10	PAPPA	113.502	3.3095	-5.09996	8.93975e-22	1.2278e-19
	ENSG00000142552.8	RCN3	179.186	624.889	1.80214	1.20154e-21	1.62502e-19
	ENSG00000118257.16	NRP2	734.044	284.686	-1.36649	1.86904e-21	2.50862e-19
	ENSG00000182795.13	C1orf116	131.965	466.043	1.82031	1.92436e-21	2.56345e-19
	ENSG00000119138.4	KLF9	143.474	17.227	-3.05805	2.10372e-21	2.78146e-19
	ENSG00000198796.7	ALPK2	113.424	3.90281	-4.86107	3.0205e-21	3.96402e-19
	ENSG00000196730.13	DAPK1	750.503	312.405	-1.26444	4.84919e-21	6.31714e-19
	ENSG00000106018.14	VIPR2	777.515	278.968	-1.47877	1.21577e-20	1.57225e-18
	ENSG00000128298.17	BAIAP2L2	5.08021	116.695	4.52171	1.38661e-20	1.78018e-18
	ENSG00000112852.6	PCDHB2	21.01	151.5	2.85016	1.57747e-20	2.01065e-18
	ENSG00000163453.11	IGFBP7	1454.73	590.009	-1.30194	1.64813e-20	2.08571e-18
	ENSG00000163362.11	INAVA	809.066	1734.87	1.1005	1.89762e-20	2.3844e-18
	ENSG00000173698.18	ADGRG2	136.588	499.661	1.87112	2.95159e-20	3.65688e-18
	ENSG00000142089.16	IFITM3	8452.15	3987.23	-1.08393	3.38764e-20	4.16797e-18
	ENSG00000286134.1	AC114930.1	8.63309	125.622	3.86306	3.48041e-20	4.25259e-18
	ENSG00000135373.12	EHF	81.0725	339.731	2.06711	4.14206e-20	5.02636e-18
	ENSG00000135454.14	B4GALNT1	78.8138	330.952	2.0701	4.37509e-20	5.27302e-18
	ENSG00000128510.12	CPA4	88.1159	413.527	2.23051	5.47211e-20	6.55063e-18
	ENSG00000187634.12	SAMD11	281.817	41.4475	-2.7654	1.53643e-19	1.81473e-17
	ENSG00000105048.17	TNNT1	69.5613	271.802	1.9662	1.61603e-19	1.8961e-17
	ENSG00000059804.16	SLC2A3	127.914	1.78175	-6.16573	1.66133e-19	1.93644e-17
	ENSG00000108797.12	CNTNAP1	350.451	817.003	1.22113	1.92732e-19	2.21729e-17
	ENSG00000176720.6	BOK	1088.3	385.407	-1.49763	2.30987e-19	2.64025e-17
	ENSG00000124406.16	ATP8A1	132.076	427.899	1.6959	2.50061e-19	2.83996e-17
	ENSG00000168672.4	FAM84B	421.383	147.302	-1.51635	2.5592e-19	2.88798e-17
	ENSG00000041353.10	RAB27B	212.887	649.724	1.60974	2.8396e-19	3.18412e-17
	ENSG00000157064.11	NMNAT2	3.26673	116.346	5.15443	5.12655e-19	5.7124e-17
	ENSG00000124920.13	MYRF	72.9729	270.146	1.88831	5.22799e-19	5.78901e-17
	ENSG00000196083.10	IL1RAP	493.92	161.649	-1.61141	5.65208e-19	6.21974e-17
	ENSG00000057252.13	SOAT1	3723.77	7687.68	1.04578	7.31826e-19	8.00355e-17
	ENSG00000113083.14	LOX	800.148	274.542	-1.54324	7.47657e-19	8.12653e-17
	novel.1757	novel.1757	292.759	826.069	1.49655	1.01793e-18	1.09967e-16
	ENSG00000160191.18	PDE9A	177.399	29.4062	-2.5928	1.07263e-18	1.15174e-16
	ENSG00000124102.5	PI3	54.4766	232.414	2.09299	1.24619e-18	1.33004e-16
	ENSG00000169418.10	NPR1	2593.38	1174.98	-1.1422	2.20476e-18	2.33903e-16
	ENSG00000074370.18	ATP2A3	144.936	427.944	1.56201	2.38194e-18	2.51195e-16
	ENSG00000184500.15	PROS1	417.998	976.338	1.22389	2.58653e-18	2.69562e-16
	ENSG00000122176.12	FMOD	1.44143	153.052	6.73038	2.65237e-18	2.74807e-16
	ENSG00000184489.11	PTP4A3	12.5955	118.726	3.23665	2.81844e-18	2.90316e-16
	ENSG00000120899.18	PTK2B	349.032	114.327	-1.61019	2.8852e-18	2.95474e-16
	ENSG00000144824.20	PHLDB2	1773.21	838.56	-1.08038	2.94037e-18	2.99393e-16
	ENSG00000102096.9	PIM2	978.613	337.942	-1.53397	3.92735e-18	3.97605e-16
	ENSG00000111816.8	FRK	32.5894	171.425	2.3951	3.99609e-18	4.02265e-16
	ENSG00000139946.10	PELI2	1.44422	146.692	6.66635	5.1571e-18	5.16205e-16
	ENSG00000152952.12	PLOD2	3180.38	1406.59	-1.17699	5.30119e-18	5.27647e-16
	ENSG00000140545.15	MFGE8	124.83	368.417	1.56137	5.51495e-18	5.45857e-16
	ENSG00000156011.17	PSD3	97.9364	336.203	1.77942	1.08964e-17	1.06658e-15
	ENSG00000169093.16	ASMTL	1067.35	460.366	-1.21318	1.29858e-17	1.26412e-15
	ENSG00000181143.15	MUC16	367.929	941.149	1.355	1.49599e-17	1.44046e-15
	ENSG00000068024.16	HDAC4	1356.88	671.409	-1.01503	1.76356e-17	1.67983e-15
	ENSG00000165995.20	CACNB2	136.56	17.4776	-2.96596	1.854e-17	1.75654e-15
	ENSG00000183691.4	NOG	230.678	49.3041	-2.2261	2.12537e-17	2.00294e-15
	ENSG00000128872.10	TMOD2	10.1495	128.515	3.66246	2.54678e-17	2.3748e-15
	ENSG00000141441.16	GAREM1	34.6876	209.593	2.5951	2.72282e-17	2.52567e-15
	ENSG00000170775.2	GPR37	288.592	61.6892	-2.22594	3.80277e-17	3.49086e-15
	ENSG00000213694.5	S1PR3	147.499	428.425	1.53834	4.46978e-17	4.08201e-15
	ENSG00000106780.9	MEGF9	383.787	921.465	1.26362	4.67445e-17	4.24704e-15
	ENSG00000127954.12	STEAP4	6142.33	2400.06	-1.35572	6.07337e-17	5.48989e-15
	ENSG00000110042.8	DTX4	1407.81	698.737	-1.01063	6.25316e-17	5.62371e-15
	ENSG00000166450.13	PRTG	234.998	591.021	1.33056	6.52209e-17	5.83595e-15
	ENSG00000050405.13	LIMA1	922.111	408.214	-1.17562	7.04767e-17	6.27455e-15
	ENSG00000078269.15	SYNJ2	362.365	770.499	1.08835	7.55905e-17	6.66369e-15
	ENSG00000057657.17	PRDM1	325.317	723.448	1.15304	7.55998e-17	6.66369e-15
	ENSG00000175445.16	LPL	310.708	829.989	1.41753	7.7647e-17	6.81026e-15
	ENSG00000138944.8	SHISAL1	602.766	244.795	-1.30002	8.31798e-17	7.25959e-15
	ENSG00000137393.9	RNF144B	303.596	796.27	1.3911	1.17036e-16	1.01644e-14
	ENSG00000053918.16	KCNQ1	120.807	434.188	1.84561	1.27827e-16	1.10474e-14
	ENSG00000171130.18	ATP6V0E2	387.444	851.886	1.13667	1.65217e-16	1.42095e-14
	ENSG00000238113.6	LINC01410	5.01492	101.576	4.34019	1.66667e-16	1.42649e-14
	ENSG00000137673.9	MMP7	115.476	389.879	1.75543	1.86384e-16	1.58758e-14
	ENSG00000173744.17	AGFG1	1877.01	839.119	-1.16149	2.42369e-16	2.04478e-14
	ENSG00000104361.10	NIPAL2	7.1788	107.233	3.90086	2.45951e-16	2.06517e-14
	ENSG00000070404.10	FSTL3	13293.9	5383.83	-1.30406	2.95757e-16	2.46006e-14
	ENSG00000246228.6	CASC8	234.325	59.521	-1.97704	2.98826e-16	2.47397e-14
	ENSG00000072163.19	LIMS2	95.8545	284.163	1.5678	3.35131e-16	2.76164e-14
	ENSG00000173702.7	MUC13	2.54655	95.075	5.22245	3.60919e-16	2.94673e-14
	ENSG00000099998.17	GGT5	185.462	44.2356	-2.06784	3.90794e-16	3.17601e-14
	ENSG00000170921.15	TANC2	387.879	861.035	1.15047	3.9611e-16	3.20451e-14
	ENSG00000153071.15	DAB2	3542.19	7413.79	1.06557	4.80664e-16	3.85782e-14
	ENSG00000153162.9	BMP6	710.324	303.28	-1.22783	4.8122e-16	3.85782e-14
	ENSG00000135114.12	OASL	1223.89	565.055	-1.11501	6.39812e-16	5.1061e-14
	ENSG00000137962.13	ARHGAP29	1293.43	2883.06	1.1564	6.94124e-16	5.51448e-14
	ENSG00000235531.9	MSC-AS1	17.7484	130.174	2.87468	7.00294e-16	5.51448e-14
	ENSG00000225411.3	CR786580.1	7.64093	101.505	3.73166	7.00321e-16	5.51448e-14
	ENSG00000141542.11	RAB40B	310.721	653.418	1.07239	7.77461e-16	6.09481e-14
	ENSG00000244509.4	APOBEC3C	1009.03	445.671	-1.17892	9.90454e-16	7.73034e-14
	ENSG00000171488.15	LRRC8C	29.6165	183.376	2.63033	1.01757e-15	7.90712e-14
	ENSG00000137819.13	PAQR5	383.745	1008.01	1.39329	1.20755e-15	9.30179e-14
	ENSG00000144460.12	NYAP2	433.379	158.422	-1.45185	1.20557e-15	9.30179e-14
	ENSG00000147251.15	DOCK11	164.949	478.985	1.53796	1.21776e-15	9.33984e-14
	ENSG00000107249.23	GLIS3	13.0418	105.895	3.02142	1.37722e-15	1.05173e-13
	ENSG00000135547.9	HEY2	17.6833	129.656	2.87423	1.43796e-15	1.09341e-13
	ENSG00000237412.6	PRSS56	148.921	13.6305	-3.44963	1.58651e-15	1.2012e-13
	ENSG00000082438.16	COBLL1	1775.6	612.512	-1.5355	1.77822e-15	1.33494e-13
	ENSG00000184194.5	GPR173	101.206	294.159	1.5393	1.80215e-15	1.3472e-13
	ENSG00000143013.13	LMO4	401.732	144.57	-1.47446	2.09721e-15	1.55466e-13
	ENSG00000131370.16	SH3BP5	1677.63	793.556	-1.08002	2.34294e-15	1.71529e-13
	ENSG00000160223.17	ICOSLG	354.608	110.057	-1.68798	3.12911e-15	2.25359e-13
	ENSG00000085978.22	ATG16L1	788.476	389.943	-1.0158	4.33824e-15	3.11176e-13
	ENSG00000166801.15	FAM111A	361.682	845.856	1.22569	5.69656e-15	4.0696e-13
	ENSG00000266074.8	BAHCC1	354.382	978.342	1.46503	6.433e-15	4.57725e-13
	ENSG00000161091.13	MFSD12	12163.8	5682.53	-1.09799	7.04337e-15	4.99149e-13
	ENSG00000122547.11	EEPD1	13.2607	115.248	3.11951	8.33834e-15	5.86231e-13
	ENSG00000185518.11	SV2B	100.763	10.7694	-3.22596	9.32378e-15	6.52923e-13
	ENSG00000170382.12	LRRN2	131.045	334.919	1.35375	9.56227e-15	6.66987e-13
	ENSG00000112297.15	CRYBG1	12.2206	99.5056	3.02547	1.25235e-14	8.63341e-13
	ENSG00000198286.9	CARD11	44.4642	197.214	2.14904	1.60511e-14	1.10224e-12
	ENSG00000116685.16	KIAA2013	2104.84	1027.92	-1.03398	2.29287e-14	1.56241e-12
	ENSG00000108602.18	ALDH3A1	1075.58	2465.72	1.19689	2.39768e-14	1.62757e-12
	ENSG00000119888.10	EPCAM	60.5389	207.112	1.77448	2.83701e-14	1.91115e-12
	ENSG00000154556.18	SORBS2	88.2495	8.47253	-3.38072	2.90983e-14	1.95278e-12
	ENSG00000232010.1	AP001059.1	84.0389	7.86759	-3.41706	3.13484e-14	2.09585e-12
	ENSG00000005020.13	SKAP2	156.075	428.214	1.45609	3.18443e-14	2.121e-12
	ENSG00000205221.12	VIT	103.607	0.168081	-9.26775	4.16659e-14	2.75446e-12
	ENSG00000078081.8	LAMP3	38.8074	175.189	2.17451	4.78719e-14	3.14128e-12
	ENSG00000165512.5	ZNF22	51.8048	200.322	1.95116	4.80908e-14	3.144e-12
	ENSG00000145569.6	OTULINL	657.879	1344.23	1.03089	4.89899e-14	3.19101e-12
	ENSG00000100767.16	PAPLN	453.156	942.781	1.05691	5.64116e-14	3.60488e-12
	ENSG00000149679.11	CABLES2	172.468	414.804	1.2661	5.84764e-14	3.71336e-12
	ENSG00000117266.15	CDK18	376.377	822.007	1.12697	6.44954e-14	4.06643e-12
	ENSG00000084636.18	COL16A1	128.225	384.258	1.5834	6.60519e-14	4.1498e-12
	ENSG00000128708.13	HAT1	1810.3	901.004	-1.00663	7.12604e-14	4.4612e-12
	ENSG00000115540.15	MOB4	638.153	278.731	-1.19503	8.42085e-14	5.25325e-12
	ENSG00000069011.16	PITX1	3991.38	1940.45	-1.04049	8.88841e-14	5.50615e-12
	ENSG00000108176.15	DNAJC12	227.899	503.021	1.14223	9.2395e-14	5.7037e-12
	novel.15326	novel.15326	0.199269	111.649	9.13003	9.28282e-14	5.71054e-12
	ENSG00000123607.15	TTC21B	632.7	271.36	-1.22131	9.82672e-14	6.02422e-12
	ENSG00000169239.13	CA5B	898.936	437.377	-1.03934	1.40957e-13	8.61148e-12
	ENSG00000168243.11	GNG4	113.491	307.98	1.44025	1.48879e-13	9.06425e-12
	ENSG00000225697.13	SLC26A6	955.454	461.142	-1.05098	1.70081e-13	1.03196e-11
	ENSG00000165895.19	ARHGAP42	45.7568	184.139	2.00874	2.00801e-13	1.21419e-11
	ENSG00000005469.11	CROT	259.34	563.238	1.1189	2.26906e-13	1.35814e-11
	ENSG00000165650.12	PDZD8	806.964	1712.53	1.08555	2.37563e-13	1.41714e-11
	ENSG00000146678.10	IGFBP1	9.07732	86.1402	3.24635	2.58402e-13	1.53628e-11
	ENSG00000175040.6	CHST2	284.114	694.682	1.28988	2.95773e-13	1.74093e-11
	ENSG00000215845.11	TSTD1	175.74	40.0611	-2.13317	3.03809e-13	1.78231e-11
	ENSG00000177409.12	SAMD9L	33.5002	154.768	2.20787	3.09813e-13	1.81154e-11
	ENSG00000132357.14	CARD6	419.205	866.527	1.04759	3.2083e-13	1.85756e-11
	ENSG00000169554.20	ZEB2	129.522	26.3526	-2.29718	3.26405e-13	1.88369e-11
	ENSG00000011422.12	PLAUR	746.402	337.599	-1.14464	3.67356e-13	2.10629e-11
	ENSG00000033327.13	GAB2	389.983	799.932	1.03647	4.36513e-13	2.47875e-11
	ENSG00000123838.11	C4BPA	92.4462	11.886	-2.95935	4.60308e-13	2.60552e-11
	ENSG00000012171.19	SEMA3B	4042.93	1877.24	-1.10679	5.13976e-13	2.90004e-11
	ENSG00000153234.14	NR4A2	283.478	92.168	-1.6209	6.10036e-13	3.42026e-11
	ENSG00000108375.12	RNF43	2.53182	73.5582	4.86064	6.68882e-13	3.71492e-11
	ENSG00000006756.16	ARSD	128.402	332.93	1.37455	6.98019e-13	3.86462e-11
	novel.26243	novel.26243	2.90126	68.2791	4.55669	7.13846e-13	3.93994e-11
	ENSG00000088826.18	SMOX	641.226	250.784	-1.35439	8.36091e-13	4.58607e-11
	ENSG00000003147.19	ICA1	17.1178	110.593	2.6917	8.61981e-13	4.69899e-11
	ENSG00000125266.7	EFNB2	125.431	305.252	1.28311	9.42366e-13	5.12144e-11
	ENSG00000020577.13	SAMD4A	153.027	369.615	1.27224	1.00978e-12	5.47106e-11
	ENSG00000138182.14	KIF20B	825.513	312.448	-1.40168	1.03571e-12	5.59443e-11
	ENSG00000170571.12	EMB	349.335	810.049	1.2134	1.08312e-12	5.79748e-11
	ENSG00000116574.6	RHOU	476.018	992.221	1.05965	1.18993e-12	6.31547e-11
	ENSG00000213949.9	ITGA1	750.238	354.121	-1.08311	1.19059e-12	6.31547e-11
	ENSG00000092068.20	SLC7A8	46.0218	169.489	1.88081	1.69722e-12	8.87011e-11
	ENSG00000164251.5	F2RL1	32.4818	155.715	2.2612	1.78515e-12	9.27491e-11
	ENSG00000154917.11	RAB6B	72.1744	219.808	1.60669	2.27849e-12	1.17009e-10
	ENSG00000183801.8	OLFML1	410.367	854.245	1.05774	2.56419e-12	1.313e-10
	ENSG00000005243.10	COPZ2	82.9925	233.378	1.49162	2.65426e-12	1.3552e-10
	ENSG00000007372.22	PAX6	73.0768	5.33867	-3.77486	3.63502e-12	1.84005e-10
	ENSG00000125968.9	ID1	2874.6	1248.12	-1.2036	3.92764e-12	1.97128e-10
	ENSG00000166510.14	CCDC68	43.323	165.125	1.93035	4.51117e-12	2.24507e-10
	ENSG00000243988.1	RPS24P17	83.5902	0.915022	-6.51338	4.57208e-12	2.26901e-10
	novel.26263	novel.26263	1.80501	75.5945	5.3882	4.87786e-12	2.40727e-10
	ENSG00000187800.13	PEAR1	53.7659	174.046	1.6947	5.08633e-12	2.50318e-10
	ENSG00000181418.8	DDN	57.1561	2.38116	-4.58517	5.49984e-12	2.69919e-10
	ENSG00000140795.13	MYLK3	175.607	51.9946	-1.75592	5.92722e-12	2.88496e-10
	ENSG00000117519.16	CNN3	213.446	456.16	1.09567	6.27788e-12	3.04726e-10
	ENSG00000132688.11	NES	310.691	702.347	1.1767	6.52735e-12	3.1597e-10
	novel.26247	novel.26247	7.58709	75.2974	3.31098	6.70627e-12	3.22867e-10
	ENSG00000164307.13	ERAP1	268.721	624.911	1.21754	6.86283e-12	3.29509e-10
	ENSG00000144426.18	NBEAL1	301.347	120.097	-1.32723	7.59144e-12	3.63507e-10
	ENSG00000139445.18	FOXN4	111.91	271.387	1.27801	7.83463e-12	3.74141e-10
	ENSG00000131069.20	ACSS2	813.955	402.823	-1.0148	8.27912e-12	3.93247e-10
	novel.17049	novel.17049	62.8089	0.167978	-8.54656	9.19032e-12	4.33045e-10
	ENSG00000130768.15	SMPDL3B	105.519	273.472	1.37388	1.10024e-11	5.15685e-10
	ENSG00000115596.4	WNT6	241.828	74.9024	-1.6909	1.18354e-11	5.53264e-10
	ENSG00000185633.10	NDUFA4L2	81.7326	8.55909	-3.25538	1.54816e-11	7.1059e-10
	ENSG00000111432.4	FZD10	77.5643	0.890629	-6.44442	1.66598e-11	7.60727e-10
	ENSG00000084731.15	KIF3C	95.0952	262.578	1.4653	1.72358e-11	7.85004e-10
	ENSG00000100867.14	DHRS2	32.239	130.224	2.01411	1.84548e-11	8.36224e-10
	ENSG00000151726.14	ACSL1	420.255	186.969	-1.16847	2.00703e-11	9.04799e-10
	ENSG00000141338.14	ABCA8	84.3769	7.66157	-3.46114	2.09079e-11	9.40166e-10
	ENSG00000172731.14	LRRC20	162.977	366.066	1.16744	2.20312e-11	9.88167e-10
	ENSG00000135919.13	SERPINE2	76.0044	225	1.56577	2.62894e-11	1.17618e-09
	ENSG00000092758.17	COL9A3	501.447	169.253	-1.56692	2.67959e-11	1.19583e-09
	novel.27027	novel.27027	1.08741	73.3974	6.07677	2.69361e-11	1.19906e-09
	ENSG00000115295.20	CLIP4	172.589	402.89	1.22305	3.12141e-11	1.38255e-09
	ENSG00000104369.5	JPH1	594.816	280.554	-1.08416	3.17242e-11	1.40164e-09
	ENSG00000277117.4	FP565260.3	226.956	66.8167	-1.76413	3.46216e-11	1.52585e-09
	ENSG00000132563.16	REEP2	34.3774	127.678	1.89298	3.54797e-11	1.55978e-09
	ENSG00000101204.17	CHRNA4	72.6279	7.73524	-3.23101	3.66198e-11	1.60372e-09
	ENSG00000167191.12	GPRC5B	129.384	326.36	1.3348	3.75159e-11	1.63712e-09
	ENSG00000185186.9	LINC00313	242.793	70.6899	-1.78015	4.06502e-11	1.76953e-09
	ENSG00000127838.14	PNKD	1865.32	924.954	-1.01197	4.08839e-11	1.77534e-09
	ENSG00000111700.12	SLCO1B3	123.179	343.877	1.48113	4.46594e-11	1.93455e-09
	ENSG00000167994.12	RAB3IL1	254.79	537.898	1.07803	4.56972e-11	1.97467e-09
	ENSG00000143028.9	SYPL2	16.2512	90.2648	2.47362	4.58558e-11	1.9766e-09
	ENSG00000140391.14	TSPAN3	112.247	275.948	1.29772	4.7988e-11	2.05363e-09
	ENSG00000166313.19	APBB1	81.7414	244.462	1.58047	5.0542e-11	2.15772e-09
	ENSG00000027075.15	PRKCH	59.2398	5.80544	-3.35109	5.49503e-11	2.33466e-09
	ENSG00000182870.8	GALNT9	4.66256	62.4061	3.74249	5.71598e-11	2.42273e-09
	ENSG00000111885.7	MAN1A1	295.475	113.487	-1.38051	6.79823e-11	2.86091e-09
	ENSG00000101076.16	HNF4A	29.9353	129.522	2.11328	7.19886e-11	3.01518e-09
	ENSG00000197696.10	NMB	1.08297	69.9771	6.01382	8.49597e-11	3.52513e-09
	ENSG00000102271.14	KLHL4	78.7499	0.605735	-7.02245	8.78138e-11	3.62657e-09
	ENSG00000117226.12	GBP3	34.9275	140.786	2.01107	9.36226e-11	3.85747e-09
	ENSG00000248323.6	LUCAT1	174.683	55.7128	-1.64866	9.42667e-11	3.86603e-09
	ENSG00000184557.4	SOCS3	333.78	131.985	-1.33852	9.57505e-11	3.91781e-09
	ENSG00000105290.12	APLP1	168.178	381.321	1.18102	9.67236e-11	3.94851e-09
	ENSG00000172260.15	NEGR1	37.1265	164.629	2.14869	1.40043e-10	5.65182e-09
	ENSG00000011021.23	CLCN6	593.447	285.812	-1.05405	1.43133e-10	5.76339e-09
	ENSG00000124839.13	RAB17	703.149	327.22	-1.10357	1.60827e-10	6.46116e-09
	ENSG00000280287.1	AC131212.3	100.091	18.79	-2.41327	1.71831e-10	6.82586e-09
	ENSG00000174705.13	SH3PXD2B	483.778	210.687	-1.19925	1.76742e-10	7.00524e-09
	ENSG00000135519.8	KCNH3	39.002	134.915	1.79042	1.86893e-10	7.37458e-09
	ENSG00000100078.4	PLA2G3	52.9711	1.46508	-5.17615	1.88704e-10	7.4225e-09
	ENSG00000154310.17	TNIK	3.99792	55.4769	3.79456	1.90906e-10	7.48293e-09
	ENSG00000152256.13	PDK1	1328.4	637.255	-1.05975	1.93287e-10	7.55953e-09
	ENSG00000185885.16	IFITM1	2637.9	1110.92	-1.24763	1.9779e-10	7.70162e-09
	ENSG00000120068.6	HOXB8	80.5359	215.626	1.42083	2.1354e-10	8.27853e-09
	ENSG00000135842.17	FAM129A	87.9741	232.22	1.40034	2.23549e-10	8.64763e-09
	ENSG00000197442.10	MAP3K5	227.268	89.1035	-1.35084	2.34515e-10	9.01923e-09
	ENSG00000197977.4	ELOVL2	4.36685	59.0814	3.75804	2.37251e-10	9.09821e-09
	ENSG00000165072.10	MAMDC2	71.5273	0.600092	-6.89717	2.47391e-10	9.44618e-09
	ENSG00000130720.13	FIBCD1	145.386	342.633	1.23678	2.67333e-10	1.01638e-08
	ENSG00000102174.9	PHEX	11.6617	80.0715	2.77951	2.77612e-10	1.0532e-08
	ENSG00000163251.4	FZD5	339.902	164.094	-1.0506	2.85571e-10	1.08108e-08
	ENSG00000178401.16	DNAJC22	124.746	310.884	1.31739	3.36268e-10	1.2649e-08
	novel.22990	novel.22990	73.6081	12.8034	-2.52334	3.43361e-10	1.28884e-08
	ENSG00000196950.14	SLC39A10	2008.41	983.558	-1.02997	3.57601e-10	1.33381e-08
	ENSG00000163803.13	PLB1	3.26688	51.4883	3.97826	4.40705e-10	1.62328e-08
	ENSG00000168528.12	SERINC2	258.564	532.067	1.04109	4.53705e-10	1.66424e-08
	ENSG00000130558.19	OLFM1	167.606	406.394	1.2778	4.53029e-10	1.66424e-08
	ENSG00000180611.7	MB21D2	181.402	387.206	1.09391	5.63272e-10	2.03663e-08
	novel.8134	novel.8134	54.0781	201.395	1.89691	5.88425e-10	2.12325e-08
	ENSG00000214944.9	ARHGEF28	146.823	337.632	1.20138	6.07863e-10	2.18006e-08
	ENSG00000167107.12	ACSF2	611.673	294.462	-1.05468	6.37175e-10	2.28057e-08
	ENSG00000116833.14	NR5A2	0.198297	47.1359	7.89302	7.22644e-10	2.56575e-08
	ENSG00000189223.14	PAX8-AS1	41.3266	134.391	1.70129	8.32983e-10	2.9457e-08
	ENSG00000214425.7	LRRC37A4P	138.893	304.905	1.13439	8.58645e-10	3.0304e-08
	ENSG00000080345.17	RIF1	1787.9	885.37	-1.01391	8.89456e-10	3.12669e-08
	ENSG00000243566.6	UPK3B	178.03	373.144	1.06762	9.6913e-10	3.3933e-08
	ENSG00000101871.14	MID1	237.572	91.6033	-1.37489	1.02267e-09	3.56665e-08
	ENSG00000163975.12	MELTF	649.693	1353.91	1.0593	1.05661e-09	3.67778e-08
	ENSG00000138778.11	CENPE	338.959	79.4649	-2.09272	1.06691e-09	3.70637e-08
	ENSG00000100784.12	RPS6KA5	164.06	371.103	1.1776	1.12486e-09	3.89243e-08
	ENSG00000121900.19	TMEM54	182.649	403.419	1.1432	1.19739e-09	4.13531e-08
	ENSG00000159231.6	CBR3	199.158	455.852	1.19465	1.21585e-09	4.1909e-08
	ENSG00000143344.15	RGL1	16.2838	80.6509	2.30826	1.22017e-09	4.19762e-08
	ENSG00000145536.15	ADAMTS16	23.2007	97.1759	2.06643	1.50989e-09	5.15427e-08
	ENSG00000141639.12	MAPK4	50.9129	0.907454	-5.81006	1.52666e-09	5.20151e-08
	ENSG00000244405.8	ETV5	198.578	75.8038	-1.38937	1.53346e-09	5.21465e-08
	ENSG00000101265.16	RASSF2	82.1952	213.475	1.37694	1.82164e-09	6.14744e-08
	ENSG00000250208.6	FZD10-AS1	60.2163	0.327633	-7.52193	1.83198e-09	6.17057e-08
	novel.23288	novel.23288	75.8341	206.397	1.4445	1.91586e-09	6.4165e-08
	ENSG00000162545.6	CAMK2N1	45.922	137.095	1.57791	1.9357e-09	6.47071e-08
	ENSG00000171401.15	KRT13	24.5976	103.165	2.06836	1.9796e-09	6.59259e-08
	ENSG00000167861.16	HID1	106.714	245.715	1.20324	2.00027e-09	6.64893e-08
	ENSG00000136158.12	SPRY2	374.877	183.375	-1.03162	2.08024e-09	6.87604e-08
	ENSG00000233611.3	AC019068.1	61.8132	8.24039	-2.90713	2.10354e-09	6.94012e-08
	ENSG00000056998.20	GYG2	45.8166	3.64165	-3.65321	2.41839e-09	7.90529e-08
	ENSG00000176597.12	B3GNT5	103.121	252.855	1.29398	2.4315e-09	7.93351e-08
	novel.14507	novel.14507	164.935	60.1896	-1.45431	2.47412e-09	8.05771e-08
	ENSG00000100033.16	PRODH	71.9576	201.713	1.48708	2.68028e-09	8.71313e-08
	ENSG00000163673.7	DCLK3	35.2749	0.167494	-7.71839	2.86948e-09	9.31109e-08
	ENSG00000188641.13	DPYD	207.719	415.532	1.00033	3.09531e-09	1.00072e-07
	ENSG00000204540.10	PSORS1C1	31.2514	127.617	2.02983	3.10745e-09	1.00099e-07
	ENSG00000125864.14	BFSP1	68.4966	178.631	1.38288	3.1923e-09	1.02646e-07
	ENSG00000198794.12	SCAMP5	54.7263	172.772	1.65857	3.24974e-09	1.04304e-07
	ENSG00000099282.10	TSPAN15	113.613	272.787	1.26364	3.49926e-09	1.11907e-07
	ENSG00000062282.15	DGAT2	106.812	271.406	1.34537	3.5354e-09	1.12859e-07
	ENSG00000166963.13	MAP1A	14.7719	88.5706	2.58397	3.57803e-09	1.14014e-07
	ENSG00000125637.15	PSD4	183.69	375.661	1.03215	3.62486e-09	1.15256e-07
	ENSG00000166008.5	MAGEA9	3.62193	48.6177	3.74665	3.93915e-09	1.24181e-07
	ENSG00000163874.11	ZC3H12A	479.108	206.977	-1.21088	4.73254e-09	1.47099e-07
	ENSG00000125378.16	BMP4	94.9804	217.26	1.19372	4.82023e-09	1.49562e-07
	novel.27034	novel.27034	1.07854	51.0468	5.56467	4.85695e-09	1.50438e-07
	ENSG00000133805.15	AMPD3	16.6242	80.8696	2.28231	4.91435e-09	1.5195e-07
	ENSG00000176907.4	TCIM	312.095	149.767	-1.05927	5.20469e-09	1.60368e-07
	ENSG00000130540.14	SULT4A1	4.3165	48.9911	3.50458	5.38754e-09	1.65426e-07
	ENSG00000163590.14	PPM1L	107.733	27.8983	-1.94921	5.42736e-09	1.66361e-07
	ENSG00000109944.10	JHY	0.198402	36.6117	7.52773	5.52388e-09	1.68736e-07
	ENSG00000166501.13	PRKCB	139.835	295.425	1.07907	5.90136e-09	1.79339e-07
	ENSG00000149573.9	MPZL2	55.0793	156.805	1.50938	6.34229e-09	1.92408e-07
	ENSG00000163485.17	ADORA1	15.1419	77.2433	2.35086	6.77832e-09	2.04585e-07
	ENSG00000155465.18	SLC7A7	4.70901	48.4039	3.36163	6.79653e-09	2.04786e-07
	ENSG00000124429.18	POF1B	4.75307	55.2719	3.53962	7.16722e-09	2.14134e-07
	ENSG00000251095.6	AC097478.1	82.6501	19.2715	-2.10054	7.8484e-09	2.32915e-07
	ENSG00000144674.16	GOLGA4	840.636	359.276	-1.22639	8.24901e-09	2.44394e-07
	ENSG00000064692.19	SNCAIP	52.3794	0.608116	-6.42851	8.54299e-09	2.51999e-07
	ENSG00000265933.5	LINC00668	56.0208	153.867	1.45765	8.52487e-09	2.51999e-07
	novel.23286	novel.23286	68.3493	187.181	1.45343	9.21848e-09	2.70699e-07
	ENSG00000145506.13	NKD2	39.2825	121.208	1.62553	9.22855e-09	2.70699e-07
	ENSG00000104870.12	FCGRT	2.14301	45.4552	4.40674	9.26324e-09	2.71267e-07
	ENSG00000156510.13	HKDC1	129.518	277.487	1.09927	1.07556e-08	3.11369e-07
	ENSG00000110811.20	P3H3	101.913	289.471	1.50608	1.17167e-08	3.38636e-07
	ENSG00000225465.8	RFPL1S	33.5851	110.4	1.71684	1.22111e-08	3.5178e-07
	ENSG00000020181.17	ADGRA2	79.318	229.209	1.53094	1.28484e-08	3.69537e-07
	ENSG00000162946.22	DISC1	14.5983	75.3224	2.36727	1.28927e-08	3.70211e-07
	ENSG00000142408.4	CACNG8	7.57919	56.4729	2.89744	1.54701e-08	4.40649e-07
	ENSG00000188112.9	C6orf132	161.675	372.995	1.20606	1.55653e-08	4.42649e-07
	ENSG00000154518.9	ATP5MC3	4654.26	2283.61	-1.02723	1.61019e-08	4.56443e-07
	ENSG00000164825.4	DEFB1	63.2282	190.836	1.59369	1.60969e-08	4.56443e-07
	ENSG00000140285.10	FGF7	2.52409	41.3077	4.03257	1.68321e-08	4.74864e-07
	ENSG00000118523.6	CCN2	305.337	660.513	1.11318	1.72886e-08	4.86966e-07
	ENSG00000171408.14	PDE7B	41.0836	1.20469	-5.09183	1.76085e-08	4.95191e-07
	ENSG00000275410.5	HNF1B	146.026	321.069	1.13666	1.85414e-08	5.17744e-07
	ENSG00000160867.15	FGFR4	720.84	359.166	-1.00503	1.85137e-08	5.17744e-07
	ENSG00000135924.15	DNAJB2	778.087	374.632	-1.05446	1.85566e-08	5.17744e-07
	novel.27384	novel.27384	124.972	307.134	1.29726	2.06016e-08	5.72996e-07
	ENSG00000183317.17	EPHA10	53.5881	162.98	1.60471	2.13912e-08	5.94026e-07
	ENSG00000087253.13	LPCAT2	74.894	187.863	1.32676	2.26085e-08	6.2489e-07
	ENSG00000133739.16	LRRCC1	39.7084	126.934	1.67656	2.29264e-08	6.31706e-07
	ENSG00000110195.13	FOLR1	143.828	358.778	1.31875	2.30583e-08	6.34354e-07
	ENSG00000153094.23	BCL2L11	163.195	337.058	1.0464	2.3168e-08	6.36384e-07
	ENSG00000264590.1	RN7SL512P	24.5322	105.748	2.10789	2.37837e-08	6.52283e-07
	ENSG00000154146.13	NRGN	185.357	381.279	1.04054	2.56345e-08	7.00875e-07
	ENSG00000115271.11	GCA	56.4227	9.94112	-2.5048	2.62682e-08	7.17093e-07
	ENSG00000049089.15	COL9A2	24.1586	89.3274	1.88656	2.98266e-08	8.12981e-07
	ENSG00000261093.1	AC141586.3	30.9484	9.41692e-06	-21.6481	3.081e-08	8.3465e-07
	ENSG00000144815.16	NXPE3	130.128	276.113	1.08533	3.08093e-08	8.3465e-07
	ENSG00000172428.11	COPS9	844.155	389.585	-1.11557	3.10486e-08	8.39828e-07
	novel.23481	novel.23481	1.93968e-05	58.7086	21.5293	3.61258e-08	9.72707e-07
	ENSG00000137561.4	TTPA	4.69068	44.4727	3.24505	3.95638e-08	1.06044e-06
	ENSG00000107242.18	PIP5K1B	228.411	101.153	-1.17509	4.27507e-08	1.14029e-06
	ENSG00000175832.13	ETV4	231.614	106.138	-1.12578	4.33602e-08	1.15347e-06
	ENSG00000104213.12	PDGFRL	46.2516	138.806	1.58549	4.3605e-08	1.15824e-06
	ENSG00000188158.15	NHS	17.9936	94.3935	2.39121	4.84735e-08	1.27989e-06
	ENSG00000128714.6	HOXD13	44.4253	3.73231	-3.57324	5.11386e-08	1.34226e-06
	ENSG00000160870.14	CYP3A7	0.197744	29.6467	7.22809	5.14053e-08	1.34726e-06
	ENSG00000165168.7	CYBB	58.3504	156.177	1.42036	5.24459e-08	1.3725e-06
	novel.10079	novel.10079	0.720945	51.8889	6.16939	5.81243e-08	1.50554e-06
	novel.922	novel.922	104.471	240.813	1.20481	5.953e-08	1.5397e-06
	ENSG00000100290.3	BIK	62.5662	168.085	1.42574	6.06332e-08	1.56367e-06
	ENSG00000205413.8	SAMD9	252.308	559.739	1.14957	7.52619e-08	1.9269e-06
	ENSG00000181885.18	CLDN7	794.175	345.592	-1.20039	7.56961e-08	1.93522e-06
	ENSG00000127914.16	AKAP9	539.116	219.123	-1.29885	8.82753e-08	2.22788e-06
	ENSG00000073146.16	MOV10L1	10.5578	60.3275	2.51451	8.84257e-08	2.2285e-06
	ENSG00000168539.4	CHRM1	7.53193	54.0412	2.84297	9.71634e-08	2.43831e-06
	ENSG00000197756.9	RPL37A	15140	7130.93	-1.0862	9.79123e-08	2.45362e-06
	ENSG00000236138.4	DUX4L26	1.07505	42.8955	5.31836	9.81005e-08	2.45487e-06
	ENSG00000165152.9	TMEM246	69.6797	186.815	1.4228	9.84134e-08	2.45576e-06
	ENSG00000128713.13	HOXD11	59.6195	8.84914	-2.75217	9.83795e-08	2.45576e-06
	ENSG00000172348.14	RCAN2	0.388007	42.3019	6.7685	1.16352e-07	2.88308e-06
	ENSG00000183508.5	TENT5C	45.8454	5.5926	-3.03519	1.30682e-07	3.21568e-06
	ENSG00000253671.2	AC027117.1	10.5157	61.4118	2.54597	1.36512e-07	3.35448e-06
	ENSG00000118242.16	MREG	228.962	109.21	-1.068	1.42984e-07	3.50864e-06
	ENSG00000064393.16	HIPK2	303.585	144.691	-1.06913	1.43332e-07	3.51232e-06
	ENSG00000137501.17	SYTL2	15.9042	71.8127	2.17483	1.51617e-07	3.69999e-06
	ENSG00000170190.16	SLC16A5	314.256	148.445	-1.08201	1.58715e-07	3.85503e-06
	ENSG00000018189.13	RUFY3	211.673	99.8524	-1.08397	1.74533e-07	4.23009e-06
	ENSG00000259341.1	AC015660.1	106.703	233.244	1.12824	1.7564e-07	4.24776e-06
	ENSG00000280081.4	LINC01667	36.0891	2.62248	-3.78256	1.81293e-07	4.37002e-06
	ENSG00000185247.15	MAGEA11	1.83797	39.8479	4.43832	1.85067e-07	4.44889e-06
	ENSG00000177675.8	CD163L1	2.51487	36.4752	3.85836	1.93e-07	4.62704e-06
	ENSG00000224259.6	LINC01133	53.2229	143.384	1.42977	1.98709e-07	4.75017e-06
	ENSG00000167508.12	MVD	1250.42	601.032	-1.0569	2.02308e-07	4.80469e-06
	ENSG00000035115.21	SH3YL1	64.5801	165.465	1.35736	2.03391e-07	4.82394e-06
	ENSG00000203722.8	RAET1G	111.348	39.2432	-1.50457	2.03809e-07	4.82738e-06
	novel.27012	novel.27012	106.391	263.16	1.30657	2.05257e-07	4.8552e-06
	ENSG00000165730.16	STOX1	27.7578	107.854	1.95811	2.27881e-07	5.3115e-06
	ENSG00000048052.21	HDAC9	34.5127	106.138	1.62074	2.27373e-07	5.3115e-06
	ENSG00000204775.4	KM-PA-2	3.47942e-05	41.5136	20.1863	2.41208e-07	5.60824e-06
	ENSG00000261440.1	DUX4L45	1.08372	41.0223	5.24234	2.553e-07	5.88951e-06
	ENSG00000016402.13	IL20RA	0.198075	23.711	6.90336	2.97626e-07	6.77768e-06
	ENSG00000148677.6	ANKRD1	6.84843	46.0881	2.75055	3.09804e-07	7.04596e-06
	ENSG00000115425.14	PECR	202.029	93.932	-1.10487	3.14059e-07	7.13358e-06
	ENSG00000221944.7	TIGD1	267.167	124.789	-1.09826	3.25703e-07	7.38857e-06
	ENSG00000165449.11	SLC16A9	53.3539	9.57982	-2.47752	4.06982e-07	9.10418e-06
	ENSG00000173805.15	HAP1	16.7034	68.2804	2.03133	4.37707e-07	9.75453e-06
	ENSG00000141668.10	CBLN2	43.0778	124.488	1.53099	4.57196e-07	1.01252e-05
	ENSG00000233429.9	HOTAIRM1	34.0459	106.321	1.64287	4.71048e-07	1.04059e-05
	ENSG00000114405.10	C3orf14	19.2432	75.7783	1.97744	5.3225e-07	1.16996e-05
	ENSG00000136869.15	TLR4	6.16439	44.6508	2.85666	5.38873e-07	1.18305e-05
	ENSG00000119508.18	NR4A3	242.909	114.544	-1.08452	5.39912e-07	1.18386e-05
	ENSG00000085831.15	TTC39A	34.2838	107.34	1.64658	5.61289e-07	1.22619e-05
	ENSG00000103241.7	FOXF1	55.3717	11.2292	-2.30189	5.86984e-07	1.27916e-05
	ENSG00000138131.4	LOXL4	28.0843	89.2648	1.66833	6.3729e-07	1.3803e-05
	ENSG00000221995.5	TIAF1	106.399	38.7165	-1.45846	6.56673e-07	1.41536e-05
	ENSG00000006747.15	SCIN	90.9222	190.785	1.06925	7.13656e-07	1.53259e-05
	ENSG00000167711.13	SERPINF2	22.6927	84.6545	1.89936	7.26997e-07	1.55935e-05
	ENSG00000142675.18	CNKSR1	112.724	228.692	1.02061	7.40714e-07	1.58302e-05
	ENSG00000156475.18	PPP2R2B	44.5665	118.043	1.40528	9.17077e-07	1.92282e-05
	ENSG00000183098.11	GPC6	5.81461	41.8814	2.84856	9.31506e-07	1.94847e-05
	ENSG00000176746.6	MAGEB6	2.90828	33.5175	3.52668	9.35668e-07	1.95486e-05
	novel.15350	novel.15350	165.74	76.3163	-1.11885	1.01599e-06	2.11768e-05
	ENSG00000038002.9	AGA	119.983	243.913	1.02354	1.02224e-06	2.1257e-05
	ENSG00000185015.8	CA13	2.17267	31.0708	3.83801	1.0535e-06	2.18557e-05
	ENSG00000170537.13	TMC7	182.311	81.7313	-1.15744	1.0967e-06	2.26989e-05
	ENSG00000277363.5	SRCIN1	38.5415	104.584	1.44018	1.26273e-06	2.56852e-05
	ENSG00000183607.10	GKN2	2.53172	31.7911	3.65043	1.31585e-06	2.66738e-05
	ENSG00000232815.1	DUX4L50	0.198069	20.8669	6.71907	1.47071e-06	2.95761e-05
	ENSG00000185838.14	GNB1L	324.852	152.275	-1.0931	1.48836e-06	2.98633e-05
	ENSG00000154529.10	CNTNAP3B	6.80886	50.1781	2.88157	1.55285e-06	3.11221e-05
	ENSG00000128683.14	GAD1	169.951	78.8615	-1.10773	1.61558e-06	3.22697e-05
	ENSG00000231411.1	DUX4L31	0.388417	31.4383	6.33877	1.6469e-06	3.28582e-05
	ENSG00000116141.15	MARK1	137.31	55.5113	-1.30658	1.66498e-06	3.31443e-05
	ENSG00000180044.5	C3orf80	146.284	59.5439	-1.29674	1.67206e-06	3.32479e-05
	ENSG00000134864.10	GGACT	19.9411	69.0695	1.7923	1.68557e-06	3.3479e-05
	ENSG00000078900.15	TP73	14.8815	60.9805	2.03483	1.8786e-06	3.69402e-05
	ENSG00000169740.14	ZNF32	109.369	219.702	1.00634	1.93208e-06	3.78318e-05
	ENSG00000182557.8	SPNS3	0.197728	22.324	6.81894	1.96752e-06	3.84752e-05
	ENSG00000179085.7	DPM3	904.247	425.587	-1.08726	1.97486e-06	3.85336e-05
	ENSG00000227051.6	C14orf132	58.9944	140.202	1.24886	2.07e-06	4.02616e-05
	ENSG00000198478.8	SH3BGRL2	12.8221	62.7518	2.29102	2.13058e-06	4.1254e-05
	ENSG00000259952.1	AC009133.2	0.197483	23.0209	6.86507	2.14712e-06	4.1529e-05
	ENSG00000172086.8	KRCC1	84.7769	186.248	1.13548	2.19351e-06	4.238e-05
	ENSG00000123999.5	INHA	84.8509	27.1899	-1.64186	2.26847e-06	4.35905e-05
	ENSG00000115963.13	RND3	511.246	242.624	-1.0753	2.35131e-06	4.50371e-05
	ENSG00000143375.15	CGN	87.0503	181.508	1.06011	2.38373e-06	4.55584e-05
	ENSG00000240065.8	PSMB9	118.362	247.992	1.06708	2.4284e-06	4.6362e-05
	ENSG00000106004.5	HOXA5	28.1336	83.5573	1.57047	2.43596e-06	4.64448e-05
	ENSG00000171428.14	NAT1	29.3319	86.1843	1.55496	2.49098e-06	4.73019e-05
	ENSG00000006283.18	CACNA1G	6.90218	46.4467	2.75045	2.64668e-06	4.98313e-05
	ENSG00000206532.2	AC117402.1	0.38869	28.2669	6.18435	2.69635e-06	5.06052e-05
	ENSG00000167646.13	DNAAF3	6.4155	48.3797	2.91477	2.71261e-06	5.08026e-05
	ENSG00000134533.6	RERG	174.607	79.6248	-1.13283	2.78177e-06	5.20429e-05
	ENSG00000116667.14	C1orf21	38.6759	5.71285	-2.75915	2.79892e-06	5.23085e-05
	ENSG00000018236.15	CNTN1	17.3023	0.166813	-6.69659	2.81387e-06	5.25325e-05
	ENSG00000279493.1	FP565260.4	18.6854	0.167183	-6.80434	2.88591e-06	5.37642e-05
	ENSG00000099260.11	PALMD	91.6948	30.8015	-1.57384	2.94116e-06	5.46784e-05
	ENSG00000188338.15	SLC38A3	27.1232	84.8779	1.64586	3.01773e-06	5.59845e-05
	ENSG00000128604.20	IRF5	62.2346	141.607	1.18611	3.21667e-06	5.94261e-05
	ENSG00000149380.12	P4HA3	86.9679	26.3123	-1.72475	3.25388e-06	5.99885e-05
	ENSG00000049192.15	ADAMTS6	24.9987	0.328178	-6.25123	3.44312e-06	6.31488e-05
	ENSG00000280217.1	AC126564.1	102.05	40.016	-1.35062	3.60069e-06	6.59022e-05
	ENSG00000240024.5	LINC00888	70.2727	160.002	1.18705	3.63066e-06	6.63823e-05
	ENSG00000131242.18	RAB11FIP4	54.2232	126.136	1.21799	3.80759e-06	6.94047e-05
	ENSG00000131378.14	RFTN1	23.5523	85.1977	1.85494	3.80772e-06	6.94047e-05
	ENSG00000163235.16	TGFA	82.5014	169.646	1.04004	4.27835e-06	7.74255e-05
	ENSG00000064195.7	DLX3	45.6889	10.2264	-2.15954	4.56844e-06	8.25909e-05
	novel.20313	novel.20313	25.1792	0.32719	-6.26596	4.71848e-06	8.49565e-05
	ENSG00000078098.14	FAP	16.11	0.166568	-6.59571	4.9392e-06	8.85707e-05
	ENSG00000198223.16_PAR_Y	CSF2RA	84.7822	179.697	1.08373	4.96057e-06	8.8864e-05
	ENSG00000114541.15	FRMD4B	60.5597	16.1189	-1.90961	5.1266e-06	9.13763e-05
	ENSG00000272602.6	ZNF595	0.726956	30.418	5.38691	5.21262e-06	9.28161e-05
	ENSG00000267432.5	DNAH17-AS1	126.346	51.4306	-1.29669	5.72585e-06	0.000101242
	ENSG00000187210.14	GCNT1	8.67664	42.7497	2.30071	5.80999e-06	0.000102628
	ENSG00000130600.18	H19	170602	60355.6	-1.49908	6.04126e-06	0.000106289
	ENSG00000184635.15	ZNF93	19.9968	68.9732	1.78627	6.1111e-06	0.000107411
	ENSG00000135828.11	RNASEL	12.6242	52.9468	2.06835	6.32581e-06	0.000110965
	ENSG00000145284.12	SCD5	53.1044	126.237	1.24924	6.84855e-06	0.000118724
	novel.23154	novel.23154	204.774	533.327	1.38099	7.41824e-06	0.000128098
	ENSG00000154065.17	ANKRD29	92.6862	34.6052	-1.42136	7.62845e-06	0.000131344
	ENSG00000145687.16	SSBP2	123.149	54.2446	-1.18285	7.97884e-06	0.000137111
	ENSG00000128266.9	GNAZ	83.8661	176.643	1.07468	8.18324e-06	0.000140449
	ENSG00000088854.12	C20orf194	31.5462	86.3452	1.45265	8.19451e-06	0.000140449
	ENSG00000164418.20	GRIK2	46.5294	109.288	1.23192	8.67922e-06	0.000147856
	ENSG00000130751.9	NPAS1	129.889	267.89	1.04436	9.29464e-06	0.000157281
	ENSG00000244257.5	PKD1P1	583.241	289.362	-1.01122	9.3382e-06	0.000157717
	ENSG00000113389.16	NPR3	26.746	2.46346	-3.44057	9.53936e-06	0.000160808
	ENSG00000121895.8	TMEM156	64.7931	152.186	1.23192	9.59849e-06	0.000161651
	ENSG00000105141.6	CASP14	14.3487	0.166436	-6.42981	1.0061e-05	0.000168959
	ENSG00000154736.6	ADAMTS5	106	41.6951	-1.34611	1.05189e-05	0.000176083
	ENSG00000196562.14	SULF2	32.9971	87.9192	1.41384	1.11933e-05	0.000185692
	ENSG00000064300.9	NGFR	2.88363	27.8613	3.27231	1.14379e-05	0.000189212
	ENSG00000204406.13	MBD5	158.93	69.7401	-1.18833	1.17075e-05	0.00019349
	ENSG00000134830.5	C5AR2	31.4923	4.35065	-2.8557	1.21625e-05	0.00019995
	ENSG00000128709.13	HOXD9	231.135	110.471	-1.06506	1.3064e-05	0.00021293
	ENSG00000130052.13	STARD8	17.4339	60.7317	1.80056	1.38417e-05	0.000224025
	ENSG00000167779.9	IGFBP6	175.176	424.807	1.278	1.39939e-05	0.000226213
	ENSG00000225807.1	AC069281.1	14.1368	0.16609	-6.41134	1.40419e-05	0.000226782
	ENSG00000137261.14	KIAA0319	50.7596	119.057	1.2299	1.48666e-05	0.000237504
	ENSG00000261052.5	SULT1A3	38.8323	111.202	1.51786	1.57527e-05	0.000250756
	ENSG00000084628.10	NKAIN1	20.5239	64.0063	1.64091	1.62939e-05	0.000258672
	ENSG00000184349.13	EFNA5	74.4218	158.765	1.09309	1.65742e-05	0.000262417
	ENSG00000167157.11	PRRX2	48.1103	111.731	1.21562	1.68463e-05	0.000266012
	ENSG00000151692.15	RNF144A	52.4638	116.622	1.15245	1.71061e-05	0.000269635
	ENSG00000162777.17	DENND2D	11.8559	50.5034	2.09077	1.87866e-05	0.00029429
	ENSG00000286221.1	AC009070.1	16.2709	0.166396	-6.61153	1.88978e-05	0.000295509
	ENSG00000261305.2	AC005586.2	56.9385	138.373	1.28108	1.94406e-05	0.000302928
	ENSG00000121769.7	FABP3	49.542	120.092	1.27742	2.09518e-05	0.000323848
	ENSG00000118194.19	TNNT2	42.5769	8.29141	-2.36038	2.16195e-05	0.000333072
	ENSG00000169918.9	OTUD7A	93.4012	36.6892	-1.34808	2.17535e-05	0.000334554
	ENSG00000149531.15	FRG1BP	75.8253	154.283	1.02483	2.25902e-05	0.000346821
	ENSG00000104833.12	TUBB4A	63.4278	134.779	1.08741	2.26681e-05	0.000347715
	ENSG00000167311.13	ART5	3.24458	28.249	3.1221	2.28757e-05	0.000350293
	ENSG00000121858.11	TNFSF10	44.5246	10.0953	-2.14092	2.33499e-05	0.000356629
	ENSG00000185519.9	FAM131C	11.7902	54.9039	2.21932	2.33729e-05	0.000356673
	ENSG00000258529.5	AP001781.2	20.9246	0.327456	-5.99775	2.36197e-05	0.00035982
	ENSG00000280213.1	UCKL1-AS1	61.0325	19.0333	-1.68105	2.43337e-05	0.000369425
	ENSG00000099337.5	KCNK6	50.048	113.901	1.1864	2.54812e-05	0.000385107
	ENSG00000101276.16	SLC52A3	13.648	51.7666	1.92333	2.58553e-05	0.000389825
	ENSG00000104081.14	BMF	62.63	146.593	1.22689	2.61181e-05	0.00039248
	ENSG00000251493.5	FOXD1	8.08224	171.32	4.4058	2.74627e-05	0.000410944
	ENSG00000151575.14	TEX9	70.197	158.398	1.17407	2.80633e-05	0.000418517
	ENSG00000118276.11	B4GALT6	35.895	91.9331	1.3568	2.84793e-05	0.000424007
	ENSG00000179915.23	NRXN1	0.386682	21.1248	5.77164	2.96026e-05	0.000439621
	ENSG00000269113.4	TRABD2B	117.218	53.1971	-1.13977	3.01042e-05	0.00044595
	ENSG00000135318.12	NT5E	26.2486	72.5384	1.4665	3.04316e-05	0.000450424
	ENSG00000134755.16	DSC2	50.1886	11.8972	-2.07674	3.21466e-05	0.000474618
	ENSG00000179388.9	EGR3	0.198353	15.3946	6.27821	3.24016e-05	0.000477189
	ENSG00000214694.11	ARHGEF33	5.44281	32.456	2.57606	3.24007e-05	0.000477189
	ENSG00000226975.1	AC006987.6	0.196425	13.4632	6.09891	3.25729e-05	0.000479314
	ENSG00000027869.11	SH2D2A	94.766	192.93	1.02564	3.26367e-05	0.000479854
	ENSG00000197121.15	PGAP1	125.694	56.2252	-1.16062	3.36901e-05	0.000493295
	ENSG00000184613.10	NELL2	23.3433	2.41875	-3.27068	3.37927e-05	0.00049438
	ENSG00000172159.16	FRMD3	0.196994	12.9791	6.0419	4.17621e-05	0.000599108
	ENSG00000133943.20	DGLUCY	4.36224	29.4487	2.75506	4.35285e-05	0.000622433
	ENSG00000204618.8	RNF39	26.952	75.7107	1.4901	4.48392e-05	0.000638599
	ENSG00000214049.7	UCA1	0.716428	21.9655	4.93827	4.76559e-05	0.000674916
	ENSG00000102189.16	EEA1	299.939	136.019	-1.14086	4.90903e-05	0.000693566
	ENSG00000063180.9	CA11	54.3589	131.451	1.27394	4.99477e-05	0.000705118
	novel.27030	novel.27030	0.718498	22.3627	4.95997	5.13941e-05	0.000723232
	ENSG00000088543.15	C3orf18	33.7227	100.706	1.57837	5.16455e-05	0.000725617
	ENSG00000154856.13	APCDD1	0.196803	12.8408	6.02784	5.25129e-05	0.00073722
	ENSG00000139304.8	PTPRQ	133.806	60.1313	-1.15395	5.45317e-05	0.000763143
	ENSG00000179023.8	KLHDC7A	28.6527	80.1518	1.48406	5.47356e-05	0.000765391
	ENSG00000204442.3	FAM155A	11.3983	0.165859	-6.10272	5.52238e-05	0.000771608
	ENSG00000135338.14	LCA5	43.5077	102.966	1.24282	5.5645e-05	0.000776881
	ENSG00000055118.14	KCNH2	3.63356	26.1932	2.84974	5.89069e-05	0.000819195
	novel.19152	novel.19152	27.1448	73.054	1.42829	6.01265e-05	0.000835499
	ENSG00000160188.10	RSPH1	5.79202	31.1084	2.42517	6.10303e-05	0.000846252
	ENSG00000237517.9	DGCR5	4.63136	32.7692	2.82283	6.4103e-05	0.00088245
	ENSG00000241945.8	PWP2	6.63823	317.186	5.57839	6.43554e-05	0.000885237
	ENSG00000175352.11	NRIP3	47.0934	106.386	1.1757	6.6745e-05	0.000914556
	ENSG00000127129.10	EDN2	18.8248	58.5438	1.63688	6.91083e-05	0.000939671
	ENSG00000171916.16	LGALS9C	20.6415	1.23556	-4.06231	7.17095e-05	0.000973546
	ENSG00000167656.5	LY6D	81.1518	29.4529	-1.46221	7.20776e-05	0.000977794
	novel.8905	novel.8905	13.6796	47.9475	1.80943	7.64753e-05	0.00103151
	ENSG00000184185.10	KCNJ12	99.9384	41.5098	-1.26759	7.65027e-05	0.00103151
	ENSG00000159714.11	ZDHHC1	17.6708	54.0757	1.61362	7.68838e-05	0.00103507
	ENSG00000127578.7	WFIKKN1	21.7514	1.72718	-3.65461	8.03335e-05	0.00107579
	ENSG00000160801.14	PTH1R	20.1968	63.9585	1.66301	8.02937e-05	0.00107579
	ENSG00000267475.1	AC008736.2	9.37404	42.5487	2.18237	8.16628e-05	0.00109112
	ENSG00000154655.15	L3MBTL4	34.3241	81.9391	1.25533	8.56513e-05	0.0011384
	ENSG00000019549.12	SNAI2	202.517	100.502	-1.01082	8.67254e-05	0.00115095
	ENSG00000127533.3	F2RL3	19.4921	1.4809	-3.71834	8.71965e-05	0.0011563
	ENSG00000082497.12	SERTAD4	57.0625	14.4864	-1.97785	8.87728e-05	0.00117372
	ENSG00000141314.13	RHBDL3	24.784	70.5177	1.50858	9.14615e-05	0.00120478
	ENSG00000157445.15	CACNA2D3	88.8158	35.4346	-1.32566	9.24333e-05	0.00121667
	novel.8133	novel.8133	19.7081	67.2412	1.77056	9.84123e-05	0.00128867
	ENSG00000198610.11	AKR1C4	0.716491	20.4407	4.83435	0.000100806	0.00131419
	ENSG00000126970.16	ZC4H2	0.196842	11.5481	5.87448	0.000101978	0.00132751
	ENSG00000152076.18	CCDC74B	2.49364	25.2306	3.33885	0.000105976	0.00137049
	ENSG00000025039.14	RRAGD	33.5523	83.7008	1.31883	0.000114198	0.00146718
	ENSG00000259529.2	AL136295.5	103.914	37.0845	-1.4865	0.000114384	0.00146744
	ENSG00000188505.5	NCCRP1	93.2696	39.0263	-1.25696	0.000114373	0.00146744
	ENSG00000145861.8	C1QTNF2	2.86386	24.2642	3.08279	0.000114687	0.00147026
	ENSG00000285641.1	AL358472.6	192.002	60.058	-1.6767	0.00011597	0.00148349
	ENSG00000170629.14	DPY19L2P2	25.6332	66.8769	1.38349	0.000117057	0.00149416
	ENSG00000110693.17	SOX6	17.0044	0.595692	-4.8352	0.000124284	0.00157282
	ENSG00000107796.13	ACTA2	71.6873	148.754	1.05314	0.000126087	0.00159221
	ENSG00000277879.1	AL391988.1	10.8464	40.9921	1.91813	0.000128031	0.00161447
	ENSG00000237298.9	TTN-AS1	134.34	64.3924	-1.06092	0.000131331	0.00165255
	ENSG00000153832.12	FBXO36	47.263	13.177	-1.84269	0.000144532	0.00179571
	ENSG00000165591.6	FAAH2	31.8432	77.6138	1.28533	0.000144723	0.00179634
	ENSG00000169994.18	MYO7B	9.62212	40.4964	2.07337	0.00015536	0.0019128
	novel.23971	novel.23971	0.196365	11.5451	5.8776	0.000159406	0.00195581
	ENSG00000211689.7	TRGC1	9.96965	0.165559	-5.91213	0.00016006	0.00196112
	ENSG00000142182.8	DNMT3L	20.1661	2.42756	-3.05435	0.000162214	0.00198203
	ENSG00000144285.19	SCN1A	9.88592	0.165355	-5.90174	0.000163374	0.00199415
	ENSG00000146205.13	ANO7	126.372	62.2274	-1.02205	0.000174596	0.00211004
	ENSG00000136944.17	LMX1B	40.3204	89.422	1.14912	0.000178005	0.00214977
	ENSG00000262877.4	AC110285.2	11.8989	44.2899	1.89615	0.000183237	0.00220545
	ENSG00000126803.9	HSPA2	59.3164	21.4585	-1.46688	0.00018525	0.00222513
	ENSG00000100027.15	YPEL1	6.17796	29.977	2.27865	0.000188155	0.00225392
	ENSG00000146859.6	TMEM140	110.856	35.4134	-1.64632	0.000192427	0.00230198
	ENSG00000089048.14	ESF1	220.828	107.444	-1.03934	0.000193723	0.00231435
	ENSG00000259987.1	DUX4L46	0.197069	11.2413	5.83397	0.000195515	0.00233262
	ENSG00000112769.19	LAMA4	0.388561	15.5455	5.32221	0.000195851	0.00233348
	ENSG00000242515.5	UGT1A10	9.58073	0.16539	-5.85619	0.000196856	0.00234231
	ENSG00000204103.4	MAFB	35.5851	7.7495	-2.1991	0.000200955	0.00238148
	ENSG00000130433.7	CACNG6	0.385461	16.0746	5.38205	0.000203791	0.00240865
	ENSG00000136010.14	ALDH1L2	40.0846	88.4644	1.14205	0.000204042	0.00241
	ENSG00000284820.1	AC068946.2	80.7676	26.3278	-1.61719	0.000212532	0.00249697
	ENSG00000171388.12	APLN	15.752	52.5858	1.73914	0.000216966	0.00254232
	ENSG00000029534.20	ANK1	8.28353	35.0977	2.08306	0.000221774	0.00259523
	ENSG00000184226.15	PCDH9	54.114	113.015	1.06245	0.000226309	0.00264306
	ENSG00000241472.6	PTPRG-AS1	1.42258	20.472	3.84707	0.00024218	0.00280805
	novel.27036	novel.27036	0.385448	15.5061	5.33016	0.000243209	0.00281814
	ENSG00000156414.19	TDRD9	0.720361	17.8993	4.63504	0.000253729	0.00292094
	ENSG00000178397.13	FAM220A	236.492	0.168157	-10.4578	0.000254793	0.00293128
	ENSG00000073711.11	PPP2R3A	83.0951	36.1291	-1.2016	0.000255833	0.00294133
	ENSG00000261641.2	AL031600.3	10.8217	0.165411	-6.03173	0.000258505	0.00296436
	ENSG00000244128.6	LINC01322	0.196455	10.0669	5.67928	0.000260611	0.00298465
	ENSG00000205189.12	ZBTB10	48.1484	109.63	1.18708	0.000262104	0.00299593
	ENSG00000231107.1	LINC01508	0.388338	14.308	5.20336	0.00027435	0.00311981
	ENSG00000250510.8	GPR162	1.4632	19.034	3.70138	0.000276732	0.00314286
	ENSG00000235123.5	DSCAM-AS1	9.21699	0.165278	-5.80133	0.00028409	0.00321407
	ENSG00000067141.17	NEO1	61.9622	125.045	1.01299	0.000292816	0.00330435
	novel.11572	novel.11572	35.4837	6.93525	-2.35514	0.000293495	0.00330779
	ENSG00000187775.16	DNAH17	90.1513	38.2995	-1.23502	0.000299867	0.00336462
	ENSG00000128710.5	HOXD10	20.9887	2.46476	-3.0901	0.000303341	0.00340145
	ENSG00000163508.12	EOMES	2.9142	21.2831	2.86854	0.000309086	0.00345276
	ENSG00000124171.9	PARD6B	67.1037	149.172	1.15251	0.000311467	0.00347627
	novel.15947	novel.15947	9.76735	0.165798	-5.88047	0.000326272	0.00362646
	ENSG00000237862.1	Z94160.1	17.4497	53.7807	1.62388	0.000335396	0.00371548
	ENSG00000164128.7	NPY1R	8.94303	0.165398	-5.75675	0.000336059	0.0037189
	ENSG00000180592.16	SKIDA1	17.0211	51.7617	1.60456	0.000341669	0.00377627
	ENSG00000175920.18	DOK7	142.165	70.8488	-1.00475	0.000345904	0.00381356
	ENSG00000148655.15	LRMDA	11.2841	38.9699	1.78807	0.000347429	0.0038242
	ENSG00000280916.2	FOXCUT	25.9795	71.3203	1.45694	0.000348127	0.00382616
	ENSG00000182179.13	UBA7	11.4987	42.5578	1.88796	0.000359303	0.00392949
	ENSG00000244468.1	AC093001.1	2.89174	21.3218	2.88232	0.000361722	0.0039462
	ENSG00000055163.20	CYFIP2	2.91326	21.6528	2.89385	0.000366058	0.00398369
	ENSG00000267508.5	ZNF285	6.91533	30.4095	2.13665	0.000369154	0.00401492
	ENSG00000144749.13	LRIG1	38.7136	86.3549	1.15744	0.000384337	0.00415962
	ENSG00000182621.18	PLCB1	85.2946	37.7692	-1.17524	0.000384595	0.00415988
	ENSG00000205593.12	DENND6B	23.7346	62.1191	1.38805	0.000392301	0.00423547
	ENSG00000163995.20	ABLIM2	50.2796	103.893	1.04706	0.000393921	0.00425036
	novel.23419	novel.23419	62.1109	0.167797	-8.53198	0.000395206	0.00426066
	ENSG00000237943.6	PRKCQ-AS1	0.385711	14.533	5.23567	0.000413029	0.00442956
	ENSG00000185467.7	KPNA7	8.65613	34.0121	1.97425	0.000435737	0.00463904
	ENSG00000286193.1	AC025449.2	85.4186	36.994	-1.20726	0.000442677	0.00470198
	ENSG00000110723.12	EXPH5	62.0279	129.253	1.05921	0.000444102	0.00471429
	ENSG00000162804.14	SNED1	77.2916	33.1125	-1.22293	0.000449912	0.0047674
	ENSG00000238266.2	LINC00707	39.9721	87.8018	1.13526	0.0004603	0.00486003
	ENSG00000169302.16	STK32A	0.194538	9.2807	5.57611	0.000463077	0.00487772
	ENSG00000163328.13	GPR155	42.5153	9.8014	-2.11692	0.000468948	0.00492954
	ENSG00000112812.16	PRSS16	46.7267	102.142	1.12825	0.000473086	0.0049625
	ENSG00000146411.5	SLC2A12	6.49451	28.7081	2.14416	0.000487195	0.00508941
	ENSG00000102362.15	SYTL4	27.7444	67.9069	1.29136	0.000488658	0.00510169
	ENSG00000183307.3	TMEM121B	1.42892	17.2753	3.59572	0.000494525	0.00514777
	ENSG00000175697.10	GPR156	39.0717	85.7964	1.13479	0.000496397	0.00516422
	ENSG00000180861.9	LINC01559	0.387353	12.8379	5.05061	0.000510543	0.00529274
	ENSG00000145349.17	CAMK2D	32.1397	7.90149	-2.02416	0.000513546	0.00531454
	ENSG00000245571.6	FAM111A-DT	40.9203	93.1216	1.1863	0.000521224	0.00538025
	ENSG00000265962.1	GACAT2	31.3152	81.9959	1.38869	0.000548676	0.00562552
	ENSG00000240771.7	ARHGEF25	10.791	37.4921	1.79676	0.000559395	0.00572217
	ENSG00000270038.1	AL133467.4	36.7293	81.3765	1.14768	0.00062293	0.00628499
	ENSG00000167701.14	GPT	35.633	8.36521	-2.09074	0.000627536	0.00632067
	ENSG00000197943.10	PLCG2	49.5845	18.201	-1.44587	0.000638815	0.0064124
	ENSG00000188517.16	COL25A1	7.59636	29.7842	1.97117	0.000654808	0.00656178
	ENSG00000281706.2	AL009179.1	38.9813	87.3201	1.16353	0.000664095	0.00664733
	ENSG00000237438.7	CECR7	19.1194	50.879	1.41204	0.000673099	0.00672226
	ENSG00000136114.17	THSD1	3.63294	22.2763	2.6163	0.000687914	0.00684322
	ENSG00000242082.2	SLC5A4-AS1	2.16296	20.131	3.21834	0.00069113	0.00687136
	ENSG00000172379.21	ARNT2	18.3532	1.10001	-4.06045	0.000701736	0.00695728
	novel.27008	novel.27008	1.07388	16.159	3.91144	0.000720827	0.00712264
	ENSG00000138735.16	PDE5A	117.11	55.1324	-1.08689	0.000722605	0.00713438
	ENSG00000244731.8	C4A	43.6428	10.7565	-2.02053	0.000722821	0.00713438
	ENSG00000260260.1	SNHG19	375.17	166.589	-1.17125	0.000747213	0.00735057
	ENSG00000248405.10	PRR5-ARHGAP8	0.196147	8.63606	5.46037	0.000749832	0.00737223
	ENSG00000275793.1	RIMBP3	17.3262	54.017	1.64046	0.000753172	0.00740097
	ENSG00000226416.1	MRPL23-AS1	82.8576	30.044	-1.46356	0.00079475	0.00772809
	novel.27037	novel.27037	0.194032	8.99988	5.53554	0.000807002	0.00783862
	ENSG00000231528.2	FAM225A	20.2931	55.348	1.44754	0.000809952	0.00786297
	ENSG00000261115.6	TMEM178B	0.388587	12.0108	4.94995	0.000819276	0.00793866
	ENSG00000133069.17	TMCC2	15.4585	45.036	1.54268	0.000822857	0.00796068
	ENSG00000173432.12	SAA1	20.4869	52.909	1.36881	0.000823162	0.00796068
	ENSG00000258964.1	AL137129.1	0.195748	8.47969	5.43694	0.000838901	0.00807323
	ENSG00000172824.16	CES4A	20.5708	55.9937	1.44467	0.000843006	0.00810392
	ENSG00000184669.9	OR7E14P	11.8119	40.3817	1.77346	0.000853143	0.00817918
	ENSG00000185010.15	F8	40.4289	85.8247	1.08601	0.000853136	0.00817918
	ENSG00000198835.4	GJC2	59.3183	17.9847	-1.72171	0.000930371	0.00882408
	ENSG00000236933.1	RP11-439A17.7	34.9972	8.76925	-1.99672	0.000968235	0.00912944
	novel.10593	novel.10593	48.2573	16.5035	-1.54797	0.00098771	0.00928343
	ENSG00000175294.5	CATSPER1	0.717724	14.4823	4.33472	0.00099318	0.00932495
	ENSG00000135960.10	EDAR	15.0444	1.54973	-3.27914	0.0010002	0.00938585
	novel.27941	novel.27941	0.19605	8.34434	5.41151	0.00101813	0.00951888
	ENSG00000215910.7	C1orf167	13.3183	0.901069	-3.88562	0.00101792	0.00951888
	ENSG00000124257.6	NEURL2	1.79185	18.4087	3.36087	0.0010289	0.00960938
	ENSG00000189420.8	ZFP92	2.85983	18.7564	2.71338	0.00104095	0.00971167
	ENSG00000177822.7	TENM3-AS1	17.7137	2.29824	-2.94627	0.00106341	0.00988995
	ENSG00000275004.4	ZNF280B	46.1967	93.6798	1.01995	0.00108125	0.0100243
	ENSG00000184451.5	CCR10	13.3727	43.5182	1.70232	0.00110086	0.0101796
	ENSG00000176692.7	FOXC2	63.4115	23.6183	-1.42484	0.00111726	0.0103152
	ENSG00000183900.4	AC099522.1	1.11992	17.6817	3.98079	0.00111728	0.0103152
	ENSG00000221843.4	C2orf16	21.3922	56.1871	1.39315	0.00115601	0.0106284
	ENSG00000163993.7	S100P	1514.64	598.528	-1.33949	0.00116343	0.0106912
	ENSG00000226496.2	LINC00323	2.88978	18.5446	2.68197	0.0011774	0.0108083
	ENSG00000105696.9	TMEM59L	3.22186	19.6811	2.61084	0.00118338	0.0108496
	ENSG00000185483.12	ROR1	45.2593	93.3889	1.04504	0.00119388	0.0109087
	ENSG00000260896.6	ARLNC1	42.8247	11.4205	-1.90681	0.00123329	0.0112225
	ENSG00000173705.9	SUSD5	4.34737	23.5337	2.43651	0.00123911	0.0112638
	ENSG00000089723.10	OTUB2	37.4339	77.4017	1.04802	0.00125631	0.011391
	ENSG00000112394.17	SLC16A10	35.2987	8.9947	-1.97247	0.00129602	0.0117092
	ENSG00000165164.14	CFAP47	0.194867	7.71764	5.30759	0.00131489	0.0118615
	ENSG00000281453.1	TGFB2-OT1	0.386832	14.0704	5.18482	0.00133254	0.0120146
	ENSG00000150630.4	VEGFC	46.6965	17.629	-1.40536	0.00134301	0.0120881
	ENSG00000118997.14	DNAH7	23.8027	4.77762	-2.31676	0.00135044	0.0121328
	ENSG00000080573.7	COL5A3	7.5378	28.5583	1.92169	0.00135143	0.0121354
	ENSG00000198707.15	CEP290	121.228	53.1676	-1.1891	0.00136147	0.0121947
	novel.24086	novel.24086	25.5002	5.08741	-2.32551	0.00140397	0.0125084
	ENSG00000139971.15	ARMH4	0.38946	10.9994	4.81981	0.00142969	0.0126967
	ENSG00000151917.18	BEND6	15.8541	43.4681	1.4551	0.00144384	0.0128031
	ENSG00000127561.15	SYNGR3	39.2543	80.6074	1.03806	0.00150067	0.0132144
	ENSG00000280254.1	AC233723.2	29.676	67.6447	1.18868	0.00154089	0.0135026
	novel.27040	novel.27040	0.196063	7.85305	5.32386	0.00157049	0.0137269
	ENSG00000185008.17	ROBO2	20.9118	4.10103	-2.35026	0.00158302	0.0138092
	ENSG00000267221.2	C17orf113	20.629	50.2933	1.2857	0.00158635	0.0138295
	ENSG00000181634.8	TNFSF15	0.194174	7.46922	5.26554	0.00161891	0.0140806
	ENSG00000132334.16	PTPRE	62.7724	28.1747	-1.15573	0.00162323	0.0141113
	ENSG00000164674.15	SYTL3	14.5163	39.833	1.45629	0.00166566	0.0144094
	ENSG00000238045.9	AC009133.1	125.28	41.8612	-1.58147	0.00167623	0.0144849
	ENSG00000175544.13	CABP4	16.0237	2.05455	-2.96331	0.00167957	0.0144926
	ENSG00000159753.14	CARMIL2	14.9126	42.4029	1.50763	0.00170036	0.0145956
	ENSG00000116299.17	KIAA1324	26.8995	60.7301	1.17483	0.00172516	0.0147371
	ENSG00000100342.20	APOL1	31.9961	71.5603	1.16126	0.001729	0.0147556
	ENSG00000134245.18	WNT2B	20.6081	49.4488	1.26272	0.00175284	0.0149112
	ENSG00000232859.9	LYRM9	36.2235	73.4207	1.01926	0.00179542	0.0151989
	ENSG00000188051.7	TMEM221	6.49793	25.1158	1.95054	0.00179638	0.0151989
	ENSG00000143772.9	ITPKB	39.5128	81.1766	1.03874	0.00181754	0.0153258
	ENSG00000147168.12	IL2RG	3.57666	20.0049	2.48367	0.00182013	0.015334
	ENSG00000160145.15	KALRN	9.84282	32.7599	1.73479	0.00183284	0.015419
	ENSG00000222033.1	LINC01124	22.0674	4.89191	-2.17345	0.00183684	0.0154453
	ENSG00000153823.18	PID1	23.2634	4.01789	-2.53355	0.00185152	0.0155467
	ENSG00000144596.13	GRIP2	12.2397	0.637263	-4.26353	0.00185754	0.0155824
	ENSG00000186862.19	PDZD7	15.156	42.0104	1.47086	0.00189151	0.0157677
	ENSG00000232940.5	HCG25	5.64266	41.9395	2.89386	0.00196908	0.0163172
	ENSG00000138669.9	PRKG2	13.7888	38.6373	1.48649	0.00197516	0.0163482
	ENSG00000170608.3	FOXA3	0.194356	7.0701	5.18496	0.00201937	0.0166638
	ENSG00000146166.16	LGSN	7.26281	0.165039	-5.45965	0.00205345	0.0169057
	ENSG00000172594.13	SMPDL3A	15.7709	43.9947	1.48007	0.00211338	0.0173106
	ENSG00000134668.12	SPOCD1	2.58018	19.1642	2.89287	0.00215287	0.0175934
	ENSG00000248905.8	FMN1	0.196259	7.73176	5.29997	0.00216521	0.0176698
	ENSG00000187554.13	TLR5	1.82296	15.7845	3.11415	0.00218804	0.0178397
	ENSG00000183305.13	MAGEA2B	0.72825	12.1996	4.06625	0.00222862	0.0181122
	ENSG00000164949.8	GEM	0.386703	9.76897	4.65891	0.0022411	0.0181969
	ENSG00000259112.2	NDUFC2-KCTD14	55.185	15.4551	-1.83619	0.0022556	0.0182978
	ENSG00000091262.15	ABCC6	15.1859	39.7353	1.38769	0.00227308	0.0184162
	novel.23157	novel.23157	19.7521	51.009	1.36875	0.00230603	0.0186132
	ENSG00000249628.2	LINC00942	12.3038	1.1779	-3.38481	0.0023903	0.0192146
	ENSG00000257390.5	AC023055.1	5.56299	33.037	2.57015	0.00242592	0.0194568
	ENSG00000188322.5	SBK1	13.9218	41.5445	1.57731	0.00245168	0.0196545
	ENSG00000280087.1	AC011481.4	0.19405	7.17753	5.20899	0.00248091	0.0198708
	ENSG00000255650.5	FAM222A-AS1	7.65653	28.8299	1.9128	0.00253774	0.0202345
	ENSG00000170558.9	CDH2	58.4125	24.9192	-1.22902	0.0025738	0.0204668
	ENSG00000255339.6	AL133352.1	23.9248	4.63806	-2.36691	0.00259583	0.0206235
	ENSG00000087510.7	TFAP2C	27.0096	62.1686	1.20271	0.00261472	0.0207642
	ENSG00000180787.6	ZFP3	1.4769	14.4633	3.29175	0.00265559	0.0210511
	novel.23399	novel.23399	40.8642	5.66439	-2.85085	0.0026705	0.0211598
	ENSG00000147206.17	NXF3	10.9481	0.913359	-3.58336	0.00271157	0.0214181
	ENSG00000046653.15	GPM6B	23.5245	55.2775	1.23253	0.0027227	0.0214678
	ENSG00000234444.10	ZNF736	38.9236	79.6036	1.03219	0.00274365	0.0215849
	ENSG00000088538.13	DOCK3	27.762	61.4524	1.14636	0.00276391	0.0216865
	ENSG00000225950.8	NTF4	0.192859	6.86089	5.15278	0.00277375	0.0217445
	ENSG00000123700.4	KCNJ2	11.6307	0.946843	-3.61867	0.00288141	0.0224368
	ENSG00000260139.6	CSPG4P13	11.6528	0.880184	-3.72673	0.00288589	0.0224547
	ENSG00000177181.15	RIMKLA	2.1647	15.7913	2.86689	0.00291575	0.0226373
	ENSG00000188883.4	KLRG2	2.53044	16.0258	2.66294	0.00292803	0.0227056
	ENSG00000196081.9	ZNF724	18.4628	46.1905	1.32297	0.00292839	0.0227056
	ENSG00000243902.6	FP325335.1	4.62173	21.9818	2.2498	0.00295146	0.0228236
	ENSG00000148082.10	SHC3	2.83721	18.4371	2.70007	0.00297056	0.0229518
	ENSG00000188613.7	NANOS1	23.806	55.3527	1.21733	0.00299725	0.0231181
	ENSG00000115363.14	EVA1A	2.50429	18.3343	2.87207	0.00302062	0.0232579
	ENSG00000181690.8	PLAG1	5.81719	22.9011	1.97702	0.00316502	0.0241889
	ENSG00000225206.9	MIR137HG	4.61309	25.2155	2.4505	0.00319636	0.0243674
	ENSG00000230882.1	AC005077.4	0.3863	9.09215	4.55683	0.00323913	0.0246299
	ENSG00000153707.17	PTPRD	6.03694	0.164027	-5.20181	0.00327065	0.0248163
	ENSG00000224389.9	C4B	23.6261	5.56647	-2.08555	0.00330226	0.0250347
	ENSG00000255367.3	AC127526.2	12.1794	34.5689	1.50503	0.00339031	0.0255593
	ENSG00000140323.6	DISP2	9.5111	31.4524	1.72549	0.00342243	0.0257195
	ENSG00000115896.16	PLCL1	2.49469	16.2774	2.70593	0.00344867	0.025857
	ENSG00000132854.19	KANK4	28.6203	7.9751	-1.84347	0.0034716	0.0260069
	ENSG00000110799.13	VWF	1.45079	13.9468	3.26503	0.00350289	0.026208
	ENSG00000227764.1	LINC01693	74.1195	32.9838	-1.1681	0.0035578	0.0264958
	ENSG00000218226.1	TATDN2P2	54.8304	24.6444	-1.15372	0.00356024	0.0265022
	ENSG00000261423.1	TMEM202-AS1	148.612	58.9375	-1.33429	0.00363741	0.0269753
	ENSG00000205795.4	CYS1	0.192801	6.40188	5.05331	0.00365246	0.0270756
	ENSG00000182484.15_PAR_Y	WASH6P	1.09309	16.721	3.93517	0.00374558	0.0276502
	ENSG00000278071.1	AL161669.3	17.2885	42.5677	1.29995	0.00379889	0.0279621
	ENSG00000188385.11	JAKMIP3	37.0759	74.2729	1.00236	0.00385129	0.0282773
	ENSG00000105246.6	EBI3	13.8043	37.3643	1.43654	0.00386664	0.0283431
	ENSG00000167642.13	SPINT2	18.718	48.4215	1.37122	0.00392626	0.0287326
	ENSG00000273129.1	PACERR	2.16971	14.5429	2.74474	0.00393994	0.0288207
	ENSG00000165215.6	CLDN3	36.5177	77.7938	1.09106	0.00396825	0.0290039
	novel.21789	novel.21789	32.138	11.404	-1.49475	0.00399206	0.02907
	ENSG00000185002.10	RFX6	0.193137	6.46596	5.06517	0.00399193	0.02907
	ENSG00000171450.5	CDK5R2	5.78389	22.2892	1.94624	0.00401132	0.0291504
	ENSG00000224831.3	TMEM183B	2.49191	16.0019	2.68292	0.00407035	0.0294946
	ENSG00000163491.16	NEK10	40.5763	82.8845	1.03046	0.00407248	0.029498
	ENSG00000004848.8	ARX	47.9604	20.0384	-1.25908	0.00409981	0.0296233
	ENSG00000110427.15	KIAA1549L	0.19456	6.38343	5.03605	0.004137	0.0298677
	ENSG00000223572.9	CKMT1A	32.1281	74.9515	1.22212	0.00417313	0.0300428
	novel.12452	novel.12452	7.64459	25.656	1.74678	0.00425055	0.0304982
	ENSG00000132429.10	POPDC3	29.9026	62.891	1.07258	0.00425187	0.0304982
	ENSG00000277011.1	AC148477.4	0.19208	6.59431	5.10145	0.00435794	0.0311079
	ENSG00000170439.7	METTL7B	6.11972	23.3573	1.93233	0.00436089	0.0311164
	ENSG00000174332.5	GLIS1	18.8018	43.4016	1.20688	0.00440148	0.0313428
	ENSG00000138311.17	ZNF365	2.85387	18.7008	2.71211	0.00441041	0.0313938
	ENSG00000164061.5	BSN	7.22977	24.7338	1.77446	0.00457334	0.0323586
	ENSG00000198691.13	ABCA4	27.955	58.4633	1.06442	0.00464507	0.0327875
	ENSG00000174827.13	PDZK1	9.31774	28.7088	1.62344	0.00469998	0.0330828
	ENSG00000198133.8	TMEM229B	0.19403	6.47283	5.06004	0.00481507	0.0337455
	ENSG00000230606.6	AC159540.1	25.5215	54.4042	1.092	0.00501625	0.0349343
	ENSG00000267909.3	CCDC177	40.2739	14.6655	-1.45742	0.00509273	0.0353558
	ENSG00000146021.15	KLHL3	23.9865	55.6231	1.21346	0.00510837	0.0354366
	ENSG00000234465.11	PINLYP	2.55154	15.7965	2.63017	0.0051323	0.035533
	ENSG00000253102.1	AC004707.1	9.92816	0.560886	-4.14575	0.00514027	0.0355743
	ENSG00000241978.9	AKAP2	12.3199	1.4178	-3.11926	0.00514781	0.0355987
	ENSG00000137496.17	IL18BP	78.4068	37.6516	-1.05827	0.00515426	0.0356155
	ENSG00000279806.1	AC018629.1	16.0446	3.2898	-2.28601	0.00536043	0.0367818
	ENSG00000185532.17	PRKG1	6.15552	24.0619	1.9668	0.00558799	0.0380486
	ENSG00000236882.7	LINC01554	2.86176	15.6606	2.45217	0.00559029	0.0380496
	ENSG00000160469.16	BRSK1	5.89276	23.2296	1.97895	0.00565901	0.0384141
	ENSG00000170703.15	TTLL6	13.0497	35.1544	1.42968	0.00568304	0.0385624
	ENSG00000164749.11	HNF4G	0.726008	9.8941	3.76851	0.00589903	0.0397842
	novel.14517	novel.14517	6.58382	0.163915	-5.32791	0.00598283	0.0402575
	ENSG00000279400.1	AC008957.3	28.4212	8.58475	-1.72712	0.00609865	0.0408351
	ENSG00000143196.5	DPT	0.192489	5.86473	4.92922	0.00609705	0.0408351
	ENSG00000264982.1	AC015563.2	0.387575	7.89183	4.34781	0.00626642	0.0417825
	ENSG00000265735.1	RN7SL5P	53.9025	110.24	1.03223	0.0062969	0.0419249
	ENSG00000123095.6	BHLHE41	3.27962	15.7958	2.26794	0.00633955	0.0420982
	ENSG00000178597.7	PSAPL1	32.2546	65.0437	1.0119	0.00643824	0.0425779
	ENSG00000149927.18	DOC2A	16.5316	39.5357	1.25793	0.00650348	0.0429133
	ENSG00000104953.20	TLE6	49.7504	22.9112	-1.11865	0.00654085	0.0431438
	novel.27013	novel.27013	34.6861	7.7411	-2.16375	0.00656326	0.043257
	ENSG00000283703.2	VSIG10L2	25.4207	5.48438	-2.2126	0.00666509	0.0437515
	ENSG00000170075.9	GPR37L1	15.1625	36.6894	1.27485	0.00668281	0.0438191
	ENSG00000168631.12	MUCL3	1.08122	10.2713	3.24788	0.00672293	0.0440043
	ENSG00000279491.1	AP003733.4	5.50215	21.4467	1.96269	0.00682818	0.0445744
	ENSG00000131015.5	ULBP2	31.8049	69.3322	1.12428	0.006895	0.0449278
	ENSG00000156869.13	FRRS1	65.9593	32.1299	-1.03766	0.00690059	0.0449477
	ENSG00000145192.13	AHSG	0.192173	5.58719	4.86165	0.00691811	0.0450122
	ENSG00000138696.10	BMPR1B	10.7502	1.45906	-2.88126	0.00693566	0.0451098
	ENSG00000275234.1	AC010503.4	16.1637	38.9762	1.26983	0.00702232	0.045573
	ENSG00000231925.11	TAPBP	121.457	57.2555	-1.08496	0.0070681	0.0458198
	ENSG00000150394.14	CDH8	6.87682	23.2035	1.75453	0.00718534	0.0464439
	novel.5400	novel.5400	51.1143	21.1392	-1.27381	0.00719231	0.046472
	ENSG00000116690.12	PRG4	35.3912	14.0328	-1.33459	0.00722774	0.0466159
	ENSG00000205744.10	DENND1C	32.7302	68.0324	1.0556	0.00727304	0.0468333
	ENSG00000162894.12	FCMR	10.1248	28.5255	1.49436	0.0074798	0.0479917
	ENSG00000105695.15	MAG	12.5906	1.26114	-3.31956	0.00749941	0.0480706
	ENSG00000162745.10	OLFML2B	8.60962	25.9405	1.59119	0.00752087	0.0481211
	ENSG00000164056.11	SPRY1	26.5868	9.1299	-1.54204	0.00759507	0.0485257
	ENSG00000146090.16	RASGEF1C	1.4643	11.2758	2.94495	0.00761782	0.0486185
	ENSG00000140297.13	GCNT3	2.13615	13.3866	2.64771	0.00763655	0.0486763
	ENSG00000251365.3	LINC02236	20.366	44.9247	1.14134	0.00774817	0.0492199
	novel.12445	novel.12445	3.5352	24.1083	2.76966	0.00792048	0.049958

## Sheet: Figure 4C-H
Figure 4
C		Ctrl shRNA			STAT3 shRNA
	GTF3A	6.35597	6.24698	6.3098	6.60496	6.21975	6.64875
	BRF1	3.25096	3.44626	3.847	3.72028	4.23112	3.52356
	BRF2	3.07724	3.27501	2.87381	2.59216	3.06695	2.9241
	TBP	3.54102	3.56194	3.59335	3.80219	3.24793	3.35473
	BDP1	2.0321	2.11103	1.16993	1.66448	1.18903	1.40054
	GTF3C1	4.76075	4.49634	4.40735	4.59634	4.52419	4.89433
	GTF3C2	5.19849	5.21994	4.90737	5.68342	5.48575	5.45779
	GTF3C3	4.35332	4.24108	3.79805	3.77189	3.3978	3.73118
	GTF3C4	3.7845	3.72356	3.58737	3.62293	3.74201	3.47768
	GTF3C5	5.90833	6.01302	6.22574	5.86394	5.95791	5.93593
	GTF3C6	6.25153	6.41193	6.43813	6.29939	6.48301	6.35014
	POLR3A	3.36457	3.30159	3.33199	3.34483	3.18587	3.28836
	POLR3B	3.27947	3.06695	2.848	3.25852	3.03738	3.15866
	POLR3C	4.79598	4.53232	4.58737	5.02547	4.93687	5.0009
	POLR3D	4.66619	4.66562	4.63981	4.6565	4.7137	4.42358
	POLR3E	5.05961	5.08236	5.18824	4.99594	4.67807	4.56742
	POLR3F	3.07211	2.9241	3.09255	3.18428	3.09085	3.38405
	POLR3G	4.07895	3.63459	3.62059	3.1375	3.65878	3.14078
	POLR3H	5.43196	5.52763	5.58135	4.94158	5.3345	5.05702
	CRCP	4.05398	4.01078	3.87676	3.96255	3.94017	3.94017
	POLR3K	4.61294	4.94111	5.20203	4.48993	4.79649	4.8495
	POLR1C	5.31288	5.83744	6.08279	5.37156	6.13894	5.32012
	POLR2E	7.83491	8.42307	8.53632	7.75982	8.38323	7.84599
	POLR2F	7.03991	7.44592	7.77043	6.94696	7.23888	6.79194
	POLR2H	7.3127	7.44675	7.70494	7.27836	7.35438	7.399
	POLR2L	7.42568	8.43759	8.61346	7.55643	8.29572	7.33208
	POLR2K	5.93263	5.93381	5.90473	5.76951	5.73498	5.75649
D		CtrlshRNA1	CtrlshRNA2	CtrlshRNA3	STAT3shRNA1	STAT3shRNA2	STAT3shRNA3
	PTGS2	3.69	1.98	1.96	13.11	12.87	16.11
	DUX4L45	0.07	0	0.13	2.59	4.06	1.34
	BDKRB2	2.62	2.84	3.47	8.39	9.27	9.14
	SKAP2	5.89	3.38	2.59	11.66	8.8	11.6
	PTH1R	0.49	0.99	1.39	1.88	1.83	2.52
	KLF9	1.67	1.35	1.26	0.17	0.2	0.18
	TP73	0.46	0.16	0.28	0.88	0.8	0.87
	PAX6	5.4	2.7	2.87	0.08	0.17	0.37
	IFITM1	245.92	349.18	428.49	118.31	187.8	136.56
	PIM2	23.9	24.31	32.51	8.84	11.43	10.96
	ADORA1	0.37	0.58	0.32	3.33	2.29	2.13
	NGFR	0.04	0.03	0.06	0.49	0.42	0.48
	RERG	4.94	4.56	5.08	1.95	2.29	2.94
	HNF4A	0.6	0.45	0.74	2.94	3.32	2.29
	VIPR2	13.53	13.56	16.18	4.86	5.57	4.97
	IGFBP7	55.62	57.95	70.17	25.64	28.81	24.33
	P3H2	4.71	4.25	5.73	18.02	15.65	15.92
	BMP2	32.87	29.29	29.18	11.3	10.67	11.51
	HDAC4	14.78	11.36	15.42	8.06	8.45	6.16
	IGFBP6	7.16	9.79	18.87	26.67	36.23	31.18
	BMPR1B	0.18	0.14	0.35	0.02	0.04	0.01
	SPRY2	8.05	8.74	9.67	4.23	4.39	4.89
	F2R	0.46	0.66	0.61	3.75	3.47	4.53
	IL20RB	33.35	30.18	39.13	6.67	5.56	7.42
	DPT	0	0	0	0.31	0.1	0.26
	CD33	0.39	0.24	0.52	6.52	8.02	6.31
	SERPINE2	3.21	3.92	3.17	5.76	7.42	6.94
	SNAI2	6.18	4.43	4.76	3.05	1.7	2.74
	FAP	0.34	0.24	0.46	0	0	0
	PDE5A	2.1	2.1	1.23	1.97	1.43	0.95
	FZD5	2.43	2.58	2.33	1.2	1.34	1.26
	NOG	5.79	6.81	8.15	1.61	1.88	1.2
	NPR1	31.21	35.34	37.59	15.69	18.66	16.33
	ITGA1	9.72	6.14	8.02	4.17	3.88	4.94
	BMP4	3.83	2.86	3.27	7.17	7.89	5.91
	PRDM1	6.27	4.73	5.66	11.37	10.57	12.1
	VEGFC	1.35	1.14	0.96	0.65	0.45	0.34
	DNAJB2	19.59	18.13	22.59	9.29	12.62	9.77
	DHRS2	1.23	0.91	1.21	4.02	5.08	4.05
	LGALS9C	1.86	0.67	0.73	0.04	0.02	0.29
	DAB2	59.52	49.31	38.98	116.71	97.15	109.34
	EFNB2	1.33	1.58	1.26	3.59	3.56	3.88
	SCIN	1.93	1.47	1.74	3.61	4.08	3.93
	STAT3	69.04	63.63	60.13	10.9	14.07	12.35
	PTK2B	5.49	5.63	4.6	1.55	3.26	2.61
	SLC7A7	0.32	0.26	0.1	2.25	1.47	1.42
	DUX4L26	0	0.1	0.05	2.46	2.99	1.23
	FABP3	3.78	4.85	7.48	12.89	13.78	12.5
	WFDC1	30.25	32.57	38.55	0.81	0.88	0.9
	LIMS2	3.15	3.36	2.64	9.18	9.47	8.98
	KRT4	0.51	0.6	0.87	28.29	27.05	29.52
	FTH1	6052.44	7327.95	7734.39	13408.4	15966.9	14228.1
	NPR3	0.46	0.38	0.23	0.04	0.1	0.05
	CNTNAP3B	0.17	0.5	0.49	1.25	1.01	1.15
	SPINT2	6.38	0.63	5.99	11.65	10.55	13.32
	ETV4	6.15	6.24	6.75	3.58	3.97	3.01
	P3H3	2.46	2.53	6.54	8.12	8.93	6.57
	VASH1	0.21	0.3	0.18	2.3	2.42	2.14
E		Ctrl shRNA			STAT3 shRNA
	DPT	1.15713	0.963314	0.879555	1.0961	1.06201	0.999667
	TP73	0.899182	1.04473	1.05609	7.14973	6.28343	7.68925
	FGFR3	0.838051	1.03303	1.12892	0.442396	0.524934	0.400922
	BMP2	0.873489	1.01324	1.11327	0.31337	0.340971	0.278698
	GAPDH	1.08913	0.9362	0.97467	0.976462	0.9282	1.05982
F		Ctrl			mCh-STAT3
	DPT	0.771928	1.20062	1.02745	0.522911	0.663714	0.805901
	TP73	0.890367	1.00139	1.10825	0.405124	0.298087	0.443509
	FGFR3	1.08954	0.945961	0.964498	1.30683	1.11162	1.43206
	BMP2	0.811812	0.998237	1.18995	1.28409	1.15767	1.27066
	GAPDH	0.993525	0.940504	1.06597	0.933965	1.16082	0.888618
G	Ctrl shRNA	STAT3 shRNA
	69.04	10.9
	63.63	14.07
	60.13	12.35
H	Ctrl shRNA	STAT3 shRNA
	0.46	0.88
	0.16	0.8
	0.28	0.87
