# Supplementary material for: STAT3 promotes RNA polymerase III-directed transcription by controlling the miR-106a-5p/TP73 axis
Source: eLife. 2023 Jan 19;12:e82826. doi: 10.7554/eLife.82826 (PMC9851613; doi:10.7554/eLife.82826)
Supplement: Figure 5—figure supplement 1—source data 2. [file elife-82826-fig5-figsupp1-data2.xlsx]

## Sheet: Figure 5-figure supplement 1
Figure 5-figure supplement 1
B	Ctrl shRNA	STAT3 shRNA
	0.690755	0.960023
	0.63548	0.959982
	0.588526	0.939887
D	Ctrl shRNA	STAT3 shRNA
	0.800258	0.928224
	0.870468	1.06583
	0.825736	0.978854
F	Ctrl	mCh-STAT3
	1.08549	0.26128
	1.04173	0.227765
	1.15415	0.299921
H	Ctrl	mCh-STAT3
	1.05203	0.883967
	1.10675	0.80566
	1.27565	0.798673
