# Supplementary material for: STAT3 promotes RNA polymerase III-directed transcription by controlling the miR-106a-5p/TP73 axis
Source: eLife. 2023 Jan 19;12:e82826. doi: 10.7554/eLife.82826 (PMC9851613; doi:10.7554/eLife.82826)
Supplement: Figure 5—figure supplement 2—source data 2. [file elife-82826-fig5-figsupp2-data2.xlsx]

## Sheet: Figure 5-figure supplement 2
Figure 5-figure supplement 2
C		Ctrl vector			dCas9-VP48
	5S rRNA	1.10716	1.01182	0.88102	0.371276	0.667292	0.577382
	U6 snRNA	0.943202	1.07746	0.979342	0.496323	0.587743	0.457908
	7SL RNA	0.988388	1.06732	0.944289	0.505981	0.879484	0.649238
	tRNA-Met	1.09632	0.837676	1.06601	0.692078	0.715155	0.703296
	tRNA-Val	1.00508	1.08514	0.909782	0.246412	0.380522	0.276154
	tRNA-Thr	0.94857	1.11247	0.938965	0.408544	0.394285	0.395992
	tRNA-Leu	0.896998	1.09376	1.00924	0.589874	0.581327	0.548226
	GAPDH	1.02949	1.03425	0.936263	0.895568	1.04739	0.780019
D	Time(day)	Ctrl vector			dCas9-VP48
	0	2	2	2	2	2	2
	1	2	3	4	2	4	3
	2	5	8	4	3	5	5
	3	18	14	15	9	11	8
	4	33	36	32	16	17	22
	5	77	84	72	42	37	49
E	Time(day)	Ctrl vector			dCas9-VP48
	1	0.2285	0.2161	0.2253	0.2185	0.2084	0.2186
	2	0.4683	0.4633	0.4679	0.4428	0.4372	0.4411
	3	0.9833	0.9537	1.1382	0.7367	0.8046	0.7204
	4	1.7585	1.8493	1.9148	1.4488	1.4874	1.3553
