# Supplementary material for: STAT3 promotes RNA polymerase III-directed transcription by controlling the miR-106a-5p/TP73 axis
Source: eLife. 2023 Jan 19;12:e82826. doi: 10.7554/eLife.82826 (PMC9851613; doi:10.7554/eLife.82826)
Supplement: Figure 5—figure supplement 3—source data 1. [file elife-82826-fig5-figsupp3-data1.xlsx]

## Sheet: Figure 5-figure supplement 3
Figure 5-figure supplement 3
A		Ctrl shR			Ctrl shR+ML-60218			TP73 shR			TP73 shR+ML-60218
	5S rRNA	1.03649	1.08572	0.877782	0.708916	0.661501	0.563627	1.62031	1.46838	1.41967	1.0369	1.20041	1.17111
	U6 snRNA	0.953823	1.01825	1.02793	0.744207	0.593473	0.690881	1.93678	2.1546	1.73314	1.43944	1.1382	0.999034
	7SL RNA	1.01736	1.05562	0.927022	0.600399	0.678757	0.688437	1.69157	1.66394	1.49047	1.33014	1.11824	1.11316
	GAPDH	0.966442	1.07109	0.962471	0.996873	1.06282	0.919139	0.90186	1.05808	1.06577	1.04642	0.99099	0.919265
B
		Ctrl shR			Ctrl shR+ML-60218			TP73 shR			TP73 shR+ML-60218
	tRNA-Met	1.02181	1.03687	0.941318	0.782448	0.69896	0.67813	1.81339	1.86923	1.7227	1.36777	1.49875	1.42419
	tRNA-Val	0.941141	1.02326	1.0356	0.701421	0.481828	0.605986	2.66093	2.74633	2.31897	1.83476	1.45078	1.2734
	tRNA-Thr	0.832448	1.05757	1.10998	0.500614	0.347991	0.311831	1.66436	1.86379	2.13065	0.857701	0.917067	1.05448
	tRNA-Leu	0.906859	1.0921	1.00104	0.731985	0.635485	0.945003	2.0684	2.25131	2.00434	1.49852	1.61749	1.27356
C	Time(day)	Ctrlsh			Ctrlsh+ML-60218			TP73sh			TP73sh+ML-60218
	0	2	2	2	2	2	2	2	2	2	2	2	2
	1	3	3	4	2	3	3	4	4	5	4	3	2
	2	6	8	6	4	4	6	11	9	13	6	5	5
	3	16	14	17	8	7	8	23	27	24	8	9	13
	4	32	34	38	13	12	10	63	67	73	15	17	23
