# Supplementary material for: STAT3 promotes RNA polymerase III-directed transcription by controlling the miR-106a-5p/TP73 axis
Source: eLife. 2023 Jan 19;12:e82826. doi: 10.7554/eLife.82826 (PMC9851613; doi:10.7554/eLife.82826)
Supplement: Figure 5—source data 2. [file elife-82826-fig5-data2.xlsx]

## Sheet: Figure 5
Figure 5
B	Ctrl shRNA	STAT3 shRNA
	0.485958	0.823035
	0.437586	0.728954
	0.527769	0.873796
D	Ctrl	mCh-STAT3
	0.989047	0.495226
	0.996478	0.508635
	1.15474	0.485736
F		Ctrl shR			STAT3 shR			STAT3 shR &TP73 shR
	5S rRNA	1.0835	1.04251	0.873988	0.381174	0.349464	0.325558	0.900106	0.783867	0.79624
	U6 snRNA	1.04616	0.94222	1.01162	0.794283	0.503576	0.617337	0.980026	1.05825	1.17524
	7SL RNA	1.06361	0.931737	1.00465	0.534061	0.713561	0.555855	0.65721	0.832127	0.912656
	tRNA-Met	0.99451	1.0779	0.927586	0.280284	0.509352	0.219209	0.679947	0.694719	0.654994
	tRNA-Val	1.11482	0.983783	0.9014	0.716941	0.544334	0.426332	1.00368	1.23893	0.972317
	tRNA-Thr	1.02573	1.02954	0.944726	0.568038	0.61598	0.672214	1.11893	1.31483	1.13244
	tRNA-Leu	0.933722	1.08656	0.979723	0.653646	0.747252	0.736989	1.1057	1.19141	1.06705
	GAPDH	1.0765	0.959295	0.964207	0.97999	1.05165	1.06083	1.14357	0.939137	1.21854
G	Time(day)	Ctrl shR			STAT3 shR			STAT3 shR &TP73 shR
	0	2	2	2	2	2	2	2	2	2
	1	4	4	6	3	3	4	4	4	5
	2	8	8	9	6	7	7	8	7	9
	3	19	23	22	11	14	16	18	23	24
	4	44	45	57	20	21	24	38	43	45
	5	97	89	107	39	43	48	77	83	90
H		Ctrl shRNA			TP73 shRNA
	TP73	1.07292	0.969654	0.957423	0.209821	0.161571	0.245517
	GAPDH	0.948802	1.03235	1.01885	0.968634	1.02804	1.01153
J		Ctrl shRNA			TP73 shRNA
	5S rRNA	1.01492	0.915458	1.06963	2.20269	2.32786	2.26232
	U6 snRNA	0.971659	0.961339	1.067	1.7714	1.93984	1.8313
	7SL RNA	1.14227	1.08041	0.777321	1.82603	2.28758	2.22498
	tRNA-Met	0.99481	1.0334	0.971787	2.07263	2.26607	1.94362
	tRNA-Val	0.945739	0.91854	1.13572	1.99553	1.8193	2.11796
	tRNA-Thr	0.928773	0.94762	1.12361	1.35188	1.66924	1.69379
	tRNA-Leu	1.1209	0.919001	0.960103	2.60448	2.6878	2.89948
	GAPDH	0.873603	1.04309	1.0833	1.07235	0.927132	0.980507
K		Ctrl shRNA		TP73 shRNA
	Time(day)	Mean	SD	Mean	SD
	0	2	0	2	0
	1	3.66667	1.1547	6.33333	1.52753
	2	7.66667	1.52753	14	3.60555
	3	18	3.60555	33.3333	6.02771
	4	46	5	77	8
L	Time(day)	Ctrl shRNA			TP73 shRNA
	1	0.2856	0.3018	0.3022	0.2796	0.3378	0.3136
	2	0.6956	0.7285	0.7301	0.7274	0.8572	0.8263
	3	1.1853	1.2074	1.2476	1.8064	2.2853	2.1159
