# Supplementary material for: STAT3 promotes RNA polymerase III-directed transcription by controlling the miR-106a-5p/TP73 axis
Source: eLife. 2023 Jan 19;12:e82826. doi: 10.7554/eLife.82826 (PMC9851613; doi:10.7554/eLife.82826)
Supplement: Figure 6—source data 2. [file elife-82826-fig6-data2.xlsx]

## Sheet: Figure 6
Figure 6
A		Ctrl shRNA			TP73 shRNA
	0.02% Input	1.06052	1.01115	0.928331	1.05898	1.00977	0.931248
	TBP	1.4155	1.66876	1.52338	2.59824	3.11908	2.83123
	GTF3C2	0.852075	0.908293	0.905102	1.52031	1.6227	1.75657
	GTF3C3	0.666371	0.800623	0.713551	1.43453	1.60375	1.55405
	BRF1	0.931657	0.863709	0.771662	0.928124	1.03645	0.85085
	POLR3A	1.83214	1.72698	1.85478	3.4692	3.87213	3.57339
	IgG	0.125931	0.129963	0.151054	0.144831	0.129689	0.118901
B	0.02% Input	TBP	GTF3C2	GTF3C3	BRF1	POLR3A	IgG
	0.99855	1.83557	1.78424	2.15275	0.996207	1.89352	1.15009
	0.998636	1.8691	1.78654	2.00313	1.2	2.24214	0.997897
	1.00314	1.85851	1.94074	2.1779	1.10262	1.92658	0.787141
C		Ctrl shRNA			TP73 shRNA
	0.02% Input	0.885941	1.0034	1.11066	0.883705	1.13727	0.979024
	TBP	1.38539	1.16931	1.27094	4.72221	4.20904	5.2362
	GTF3C2	0.385319	0.388858	0.380511	0.316859	0.370022	0.375092
	GTF3C3	0.356928	0.394298	0.327548	0.376355	0.290768	0.484101
	BRF1	0.356817	0.356793	0.260742	0.312256	0.38266	0.359353
	BRF2	0.728895	0.6616	0.796228	2.1714	1.91844	1.97599
	POLR3A	1.63196	1.13107	1.26062	3.60576	4.36373	4.36953
	IgG	0.112405	0.093789	0.120086	0.120075	0.126068	0.130658
D	0.02% Input	TBP	GTF3C2	GTF3C3	BRF1	BRF2	POLR3A	IgG
	0.997476	3.40857	0.822329	1.05443	0.875115	2.97903	2.20946	1.06824
	1.13342	3.59959	0.951561	0.73743	1.0725	2.8997	3.85805	1.34417
	0.881477	4.11994	0.985758	1.47795	1.37819	2.48169	3.46616	1.08804
E		Ctrl shRNA			TP73 shRNA
	0.02% Input	1.0248	0.967269	1.00794	0.95597	1.055	0.989027
	TBP	1.41288	1.3403	1.48878	4.47276	5.0542	5.62661
	GTF3C2	1.3392	1.29014	1.22595	2.26085	2.3641	2.35397
	GTF3C3	1.00675	1.13687	0.883783	1.85254	2.07431	1.94
	BRF1	1.26519	1.37185	1.41148	1.99467	2.02515	1.89943
	POLR3A	1.65031	1.58759	1.91285	7.43353	7.17837	8.00184
	IgG	0.141101	0.124601	0.121599	0.131317	0.111359	0.109591
F	0.02% Input	TBP	GTF3C2	GTF3C3	BRF1	POLR3A	IgG
	0.932839	3.16571	1.68822	1.84013	1.57658	4.50432	0.930661
	1.0907	3.77096	1.83244	1.82459	1.47622	4.52154	0.893723
	0.981241	3.77934	1.92012	2.19511	1.3457	4.18321	0.901252
G		Ctrl shRNA			TP73 shRNA
	0.02% Input	0.873687	1.01206	1.11426	1.03118	1.01152	0.957294
	TBP	0.942496	1.08736	1.11437	2.5336	2.30809	2.22608
	GTF3C2	0.724779	0.762157	0.693405	1.48313	1.63315	1.73836
	GTF3C3	0.597221	0.547446	0.491326	1.27443	1.43083	1.37616
	BRF1	1.081	1.08299	0.949513	1.60547	1.68584	1.53897
	POLR3A	1.32433	1.40001	1.1748	6.52346	6.00223	6.01838
	IgG	0.121692	0.10732	0.12988	0.129255	0.141938	0.13993
H	0.02% Input	TBP	GTF3C2	GTF3C3	BRF1	POLR3A	IgG
	1.18027	2.68818	2.04632	2.13394	1.48517	4.92585	1.06215
	0.999473	2.12265	2.1428	2.61365	1.55665	4.28728	1.32257
	0.859133	1.99762	2.50699	2.80092	1.6208	5.12288	1.07738
