# Supplementary material for: STAT3 promotes RNA polymerase III-directed transcription by controlling the miR-106a-5p/TP73 axis
Source: eLife. 2023 Jan 19;12:e82826. doi: 10.7554/eLife.82826 (PMC9851613; doi:10.7554/eLife.82826)
Supplement: Figure 7—source data 2. [file elife-82826-fig7-data2.xlsx]

## Sheet: Figure 7
Figure 7
A		Ctrl shRNA			STAT3 shRNA
	miR-93-5p	0.970144	1.10072	0.92914	0.739769	0.858805	0.827329
	miR-106a-5p	0.909756	1.13085	0.959397	0.394763	0.44743	0.397602
	miR-519d-3p	0.89554	1.11522	0.989236	0.888668	1.07245	1.21504
	miR-20a-5p	0.892364	1.05603	1.05161	1.41647	1.2822	1.36939
	GAPDH	1.03385	1.05502	0.911135	1.10437	0.996645	0.878978
B		Ctrl			mCh-STAT3
	miR-93-5p	0.948979	0.918455	1.13257	1.41042	1.21428	1.27132
	miR-106a-5p	1.04144	0.921119	1.03744	1.83848	2.39836	2.003
	miR-519d-3p	0.929509	0.992561	1.07793	0.895541	1.08366	0.838757
	miR-20a-5p	0.9023	0.997368	1.10033	1.24089	1.32451	1.37688
	GAPDH	1.17302	0.944655	0.882328	1.09884	1.07334	1.0448
C		Ctrl shRNA			STAT3 shRNA
	miR-106a-5p	0.88338	1.13726	0.979362	0.35016	0.316862	0.358086
	GAPDH	0.927415	0.988391	1.08419	1.05603	1.00956	1.03461
D		Ctrl shRNA			STAT3 shRNA
	miR-106a-5p	0.977032	1.22952	0.79345	0.486525	0.54388	0.562169
	GAPDH	0.824047	1.12578	1.05018	0.925828	1.12479	1.03592
E		Ctrl			mCh-STAT3
	miR-106a-5p	1.04856	0.936915	1.01453	3.68972	3.5618	3.75862
	GAPDH	0.940422	1.03775	1.02183	0.89982	1.03994	0.974075
F		Ctrl			mCh-STAT3
	miR-106a-5p	0.834473	0.889897	1.27563	2.40429	1.85493	1.58872
	GAPDH	0.950875	1.20379	0.84534	0.91663	1.00178	0.862068
G		HL-7702						HepG2
	miR-106a-5p	0.830188	1.05786	0.99675	1.08242	0.960029	1.07275	5.33463	5.29039	4.72375	6.00198	6.45876	6.00315
	GAPDH	1.12992	0.988577	0.821067	0.778167	0.987359	1.29491	1.1587	0.83988	0.726929	1.26742	1.07341	1.21928
H		HEK293						HEK293T
	miR-106a-5p	1.05509	0.90626	1.04896	1.28147	0.912431	0.795791	1.86419	1.63626	1.29617	1.82242	1.55746	1.6562
	GAPDH	1.03545	1.06318	0.870518	1.09488	0.932843	1.00313	0.956434	0.938326	1.19791	1.03395	0.879619	0.967048
I	Online mapping:http://kmplot.com/analysis/index.php?p=service&cancer=pancancer_mirna
J	Online mapping:http://kmplot.com/analysis/index.php?p=service&cancer=pancancer_mirna
