# Supplementary material for: STAT3 promotes RNA polymerase III-directed transcription by controlling the miR-106a-5p/TP73 axis
Source: eLife. 2023 Jan 19;12:e82826. doi: 10.7554/eLife.82826 (PMC9851613; doi:10.7554/eLife.82826)
Supplement: Figure 8—source data 2. [file elife-82826-fig8-data2.xlsx]

## Sheet: Figure 8
figure 8
B	TP73 3’ UTR WT:	“-”	“-”	“+”	“+”
	TP73 3’ UTR Mut:	“+”	“+”	“-”	“-”
	106a-5p mimics:	“-”	“+”	“-”	“+”
		1.05465	1.07432	1.03228	0.505737
		1.01073	1.02783	0.93882	0.35503
		0.934623	0.963099	1.01971	0.366488
C	TP73 3’ UTR WT:	“-”	“-”	“+”	“+”
	TP73 3’ UTR Mut:	“+”	“+”	“-”	“-”
	106a-5p mimics:	“-”	“+”	“-”	“+”
		1.0722	1.02553	1.00094	0.413541
		1.00266	1.00928	0.947999	0.356028
		0.925134	0.889444	0.871707	0.348732
E		Ctrl mimics			106a-5p mimics
	5S rRNA	0.955043	0.894467	1.15049	2.85832	3.08982	2.43253
	U6 snRNA	1.14524	0.86341	0.991348	1.4345	2.08009	1.82385
	7SL RNA	0.987702	0.907953	1.10434	2.42781	2.55857	2.87157
	tRNA-Met	0.841146	0.921496	1.23736	3.00455	2.86312	2.29286
	tRNA-Val	0.952775	1.01935	1.02788	1.73265	1.56996	1.13898
	tRNA-Thr	1.00398	0.938971	1.05705	2.81487	3.07777	2.79338
	tRNA-Leu	0.866832	1.15837	0.974793	3.21241	3.30477	2.731
	GAPDH	0.92209	0.888126	1.18978	0.839235	0.782503	0.838446
G		Ctrl mimics			106a-5p mimics
	5S rRNA	1.159	0.819767	1.02123	1.75323	2.06131	2.31074
	U6 snRNA	1.06386	0.908578	1.02756	1.63754	1.41063	1.56646
	7SL RNA	1.108	0.933486	0.958513	2.48606	2.33778	2.83757
	tRNA-Met	1.1454	1.03975	0.814851	3.98395	3.25454	2.95223
	tRNA-Val	1.07633	1.03384	0.889826	1.66037	1.62941	1.59493
	tRNA-Thr	1.0642	0.827308	1.10849	2.16355	2.72588	2.36097
	tRNA-Leu	1.05832	0.938545	1.00314	3.12892	2.90092	2.62213
	GAPDH	1.14337	0.945222	0.911404	1.03928	1.0695	0.818302
I		Ctrl			STAT3sh			STAT3sh&miR-106a
	5S rRNA	1.00136	1.05646	0.942178	0.467682	0.460744	0.50059	1.29058	1.17386	1.323
	U6 snRNA	0.952144	1.031	1.01686	0.66304	0.645324	0.586051	1.03763	1.11063	1.15479
	7SL RNA	1.00889	0.948797	1.04232	0.488368	0.45034	0.434429	0.9421	0.88687	0.788756
	tRNA-Met	1.05869	0.992342	0.948969	0.463057	0.434912	0.438097	1.02447	0.867736	1.21346
	tRNA-Val	0.963992	1.05811	0.977898	0.381746	0.454532	0.419883	1.34458	1.34489	1.41192
	tRNA-Thr	0.95983	0.938329	1.10184	0.611645	0.577122	0.536491	1.94722	2.14787	2.33203
	tRNA-Leu	0.87296	1.05397	1.07307	0.42551	0.483878	0.501496	1.09843	1.04871	1.23133
	GAPDH	0.988644	0.989684	1.02167	1.00504	0.976938	1.01259	1.04188	0.976795	1.04384
J	Time(day)	Ctrl			STAT3sh			STAT3sh&miR-106a
	0	2	2	2	2	2	2	2	2	2
	1	4	4	5	3	4	5	4	5	5
	2	9	8	8	6	6	9	7	8	10
	3	21	26	27	12	13	16	16	23	23
	4	50	57	64	20	25	27	38	44	50
	5	110	119	125	43	47	55	87	94	99
