# Supplementary material for: STAT3 promotes RNA polymerase III-directed transcription by controlling the miR-106a-5p/TP73 axis
Source: eLife. 2023 Jan 19;12:e82826. doi: 10.7554/eLife.82826 (PMC9851613; doi:10.7554/eLife.82826)
Supplement: Figure 9—source data 1. [file elife-82826-fig9-data1.xlsx]

## Sheet: Figure 9
Figure 9
A	Input	STAT3	Ctrl IgG
	1.11822	2.04884	0.467303
	1.04964	1.71625	0.340755
	0.832143	1.67977	0.344056
C	Ctrl shRNA	STAT3 shRNA
	0.945962	0.422481
	1.01732	0.395767
	1.03672	0.388814
D	Ctrl	mCh-STAT3
	0.968614	1.87851
	1.03042	2.21028
	1.00097	2.05398
E		Ctrl shRNA			STAT3 shRNA
	miR-106a-5p	1.02991	0.98629	0.9838	0.469227	0.530356	0.652611
	GAPDH	1.18869	1.03201	0.7793	0.84781	0.95386	1.06033
F		Ctrl			mCh-STAT3
	miR-106a-5p	1.00631	1.17587	0.81782	2.35105	2.72206	3.15158
	GAPDH	1.0995	1.04949	0.85101	1.28531	1.00307	1.26647
