# Supplementary material for: STAT3 promotes RNA polymerase III-directed transcription by controlling the miR-106a-5p/TP73 axis
Source: eLife. 2023 Jan 19;12:e82826. doi: 10.7554/eLife.82826 (PMC9851613; doi:10.7554/eLife.82826)
Supplement: Supplementary file 1. [file elife-82826-supp1.xlsx]

## Sheet: RT引物
Gene name	RT primer name	Primer sequence	Notes
STAT3	RT STAT3 F	CTGAGGGAGCAGAGATGTGG
	RT STAT3 R	AATTGGGGGCTTGGTAAAAA
TP73	RT TP73 F	GACGAGGACACGTACTACCTT
	RT TP73 R	CTGCCGATAGGAGTCCACCA
DPT	RT DPT F	TGACAGACAATGGAACTACGC
	RT DPT R	TGCTGTAGCGACAACAGTAAAA
FGFR3	RT FGFR3 F	TGCGTCGTGGAGAACAAGTTT
	RT FGFR3 R	GCACGGTAACGTAGGGTGTG
BMP2	RT BMP2 F	ACTACCAGAAACGAGTGGGAA
	RT BMP2 R	GCATCTGTTCTCGGAAAACCT
GAPDH	RT GAPDH F	AAGGTCATCCATGACAAC
	RT GAPDH R	AGTGAGCTTCCCGTTCAG
5S	RT 5S F	CTACGGCCATACCACCCT
	RT 5S R	GCCTACAGCACCCGGTATT
U6	RT U6 F	CTCGCTTCGGCAGCACATA
	RT U6 R	ATATGGAACGCTTATCACGATTGCG
7SL	RT 7SL F	ACTAAGTTCGGCATCAATATG
	RT 7SL R	GAGTGCAGTGGCTATTCA
tRNA-Met	RT tRmet F	AACAACAACAACAACAACAA
	RT tRmet R	TTAGCAGAGGATGGTTTA
tRNA-Val	RT tRval F	TGTTTCCGCCCGGTTTCG
	RT tRval R	GTTTCCGTAGTGTAGTGG
tRNA-Thr	RT tRthr F	GGCTCCATAGCTCAGGG
	RT tRthr R	AGGCCCCAGCGAGATTTG
tRNA-Leu	RT tRleu F	GGTAGCGTGGCCGAGC
	Rt tRleu R	TGGCAGCGGTGGGATTC
miR-93-5p	RT 93 F	CAAAGTGCTGTTCGT	miRNA seq: CAAAGUGCUGUUCGUGCAGGUAG
	RT 93 R	TACCTCGGACCCTGCACTGG
miR-106a-5p	RT 106a F	AAAAGTGCTTACAGT	miRNA seq: AAAAGUGCUUACAGUGCAGGUAG
	RT 106 R	TACCTCGGACCCTGCACTGG
miR-519d-3p	RT 519d F	CAAAGTGCCTCCCT	miRNA seq: CAAAGUGCCUCCCUUUAGAGUG
	RT 519d R	TACCTCGGACCCTGCACTGG
miR-20a-5p	RT 20a F	TAAAGTGCTTATAGT	miRNA seq: UAAAGUGCUUAUAGUGCAGGUAG
	RT 20a R	TACCTCGGACCCTGCACTGG
miR-106a-5p mimics	Forward RNA	AAAAGUGCUUACAGUGCAGGUAG
	Reverse RNA	CUACCUGCACUGUAAGCACUUUU

## Sheet: ChIP引物
Gene promoter	ChIP primer name	sequence
5S
U6
7SL
tRNA-Met
